# Supplementary material for: First Genomic Insights Into The <em>Mandevilla</em> Genus
Source: Preprints.org preprint supplement (doi:10.20944/preprints202204.0255.v1), 2022-04-27
Supplement: Supplementary file 1 [file supplementary]

Archive with 9 entries (9 files):
- Table S1.xlsx
- Table S2.xlsx
- Table S3.xlsx
- Table S4.xlsx
- Table S5.xlsx
- Table S6.xlsx
- Table S7.xlsx
- Table S8.xlsx
- Supplementary Figure 1.pdf
