# Supplementary material for: First Genomic Insights Into The <em>Mandevilla</em> Genus
Source: Preprints.org preprint supplement (doi:10.20944/preprints202204.0255.v1), 2022-04-27
Supplement: Supplementary file 1 [file supplementary › Supplementary Figure 1.pdf]

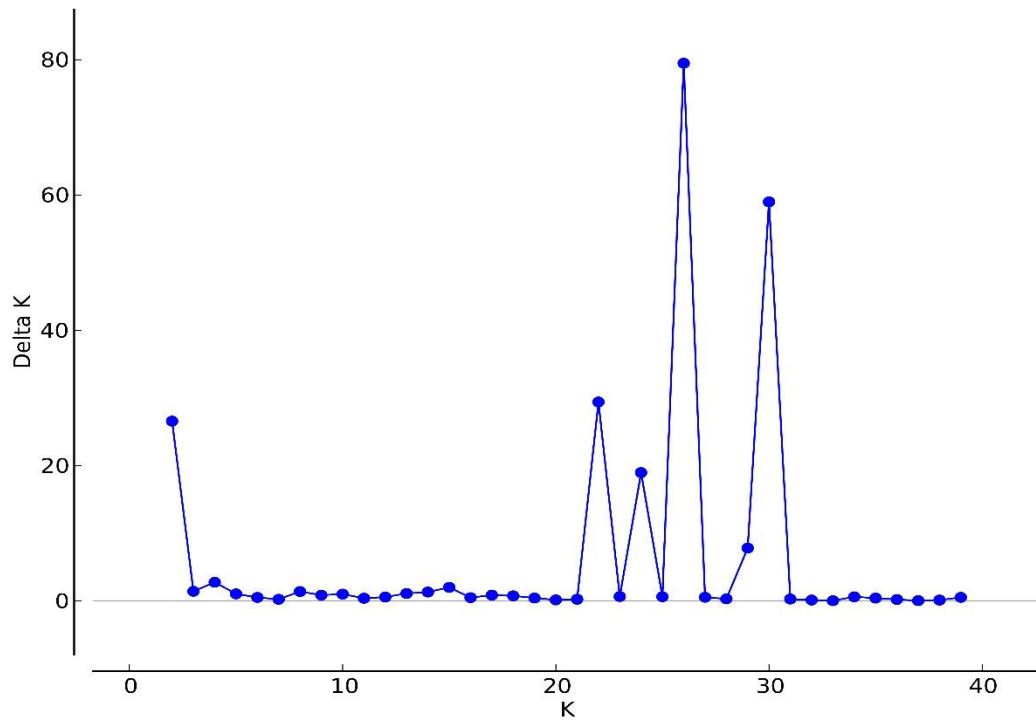

**Supplementary Figure 1.** Definition of the number of ancestral Mandevilla populations based on the SSR marker dataset.  $\Delta K$  values are represented by the blue line, while the blue points indicate the mean  $\text{LnP}(D) \pm \text{SD}$  values. Mean  $\text{LnP}(D) \pm \text{SD}$  (over 10 runs) is a function of  $K$ , as  $L'(K) = \Delta \text{LnP}(D)$  and mean  $\Delta K$  is calculated as  $|L''(K)|/(\text{SD}(L(K)))$ .
