# Supplementary material for: First Genomic Insights Into The <em>Mandevilla</em> Genus
Source: Preprints.org preprint supplement (doi:10.20944/preprints202204.0255.v1), 2022-04-27
Supplement: Supplementary file 1 [file supplementary › Table S2.xlsx]

## Sheet: Table S2
Table S2. tBLASTn results obtained by using the proteome of Coffea canephora (GCA_900059795.1) as a query to interrogate the assembled genome (E-value ≤1e-10, BLAST+ v.2.3.0)
Query (Coffea canephora)	Query length	Subject (Mandevilla)	Alignment length	Average similarity	E-value
CDO96711.1	354	jcf7180007778898	336	83.9535	1.27e-160
CDO96712.1	399	jcf7180007785708	310	46.0662	3.1e-15
CDO96715.1	437	jcf7180007833110	436	64.402	6.22e-152
CDO96716.1	118	jcf7180007787140	112	69.643	8.96e-43
CDO96717.1	217	jcf7180007787140	239	87.8825	2.995e-40
CDO96718.1	406	jcf7180007716822	393	76.4127	8.86667e-17
CDO96719.1	197	jcf7180007814499	172	77.5282	1.464e-12
CDO96720.1	193	jcf7180007738591	118	57.627	1.63e-25
CDO96721.1	276	jcf7180007809954	178	53.933	2.87e-41
CDO96722.1	367	jcf7180007789512	669	43.5888	7.52e-28
CDO96723.1	371	jcf7180007794382	302	37.086	2.33e-49
CDO96724.1	351	jcf7180007781908	204	39.706	6.81e-44
CDO96725.1	500	jcf7180007760007	117	43.59	2.23e-20
CDO96727.1	141	jcf7180007738567	43	67.442	3.46e-12
CDO96728.1	348	jcf7180007793009	306	48.039	1.46e-94
CDO96729.1	251	jcf7180007825130	257	75.9245	4.79e-13
CDO96730.1	90	jcf7180007782000	41	85.366	5.32e-15
CDO96731.1	233	jcf7180007782000	210	54.7075	1.12e-14
CDO96732.1	930	jcf7180007781428	554	54.693	2.82e-178
CDO96733.1	1347	jcf7180007781428	618	42.4655	1.415e-30
CDO96734.1	612	jcf7180007792561	551	49.546	2.33e-165
CDO96735.1	132	jcf7180007834622	106	78.1777	1.76667e-14
CDO96736.1	305	jcf7180007785308	252	67.5845	1.945e-27
CDO96737.1	381	jcf7180007783293	313	49.201	6.94e-75
CDO96738.1	271	jcf7180007719159	217	71.691	1.62667e-13
CDO96739.1	242	jcf7180007791373	112	71.992	3.63e-38
CDO96741.1	244	jcf7180007790764	89	66.292	8.85e-27
CDO96742.1	246	jcf7180007790764	95	61.053	3.24e-24
CDO96743.1	567	jcf7180007831697	514	65.0015	0
CDO96745.1	584	jcf7180007823071	604	78.6688	4.1e-70
CDO96746.1	508	jcf7180007813021	557	69.067	9.65e-48
CDO96747.1	527	jcf7180007793808	444	79.054	0
CDO96748.1	215	jcf7180007818267	194	40.206	2.17e-31
CDO96749.1	397	jcf7180007791904	375	42.4	1.04e-88
CDO96750.1	386	jcf7180007791904	327	44.954	3.71e-86
CDO96751.1	347	jcf7180007837408	305	36.066	3.28e-48
CDO96752.1	385	jcf7180007791904	348	42.816	2.66e-80
CDO96753.1	404	jcf7180007791904	386	41.71	3.87e-77
CDO96754.1	398	jcf7180007791904	354	45.198	2.19e-90
CDO96755.1	376	jcf7180007791904	337	46.291	2.15e-89
CDO96756.1	554	jcf7180007792777	551	81.125	0
CDO96757.1	372	jcf7180007808210	395	74.65	3.29e-171
CDO96758.1	396	jcf7180007808210	396	78.3835	1.37e-174
CDO96759.1	644	jcf7180007751033	639	72.4591	8.94288e-14
CDO96760.1	121	jcf7180007715335	79	93.726	1.82974e-15
CDO96761.1	365	jcf7180007715335	238	68.393	2.95e-84
CDO96762.1	159	jcf7180007803043	69	89.855	4.33e-19
CDO96764.1	500	jcf7180007787855	44	90.909	1.23e-16
CDO96765.1	295	jcf7180007820390	374	54.011	8.36e-118
CDO96766.1	383	jcf7180007791904	351	44.16	8.28e-95
CDO96767.1	491	jcf7180007719795	192	84.8355	7.19564e-14
CDO96769.1	290	jcf7180007717767	307	62.541	4.77e-125
CDO96770.1	457	jcf7180007788094	496	77.4482	2.42282e-23
CDO96771.1	383	jcf7180007791904	347	43.804	2.17e-93
CDO96772.1	178	jcf7180007779643	243	40.741	1.77e-50
CDO96773.1	676	jcf7180007779643	1371	36.4962	5.4225e-16
CDO96774.1	864	jcf7180007779643	1963	36.4663	7.60521e-16
CDO96775.1	1014	jcf7180007793032	1186	38.786	0
CDO96776.1	1107	jcf7180007793032	1185	42.532	0
CDO96777.1	423	jcf7180007711133	256	84.375	4.94e-144
CDO96778.1	504	jcf7180007759420	296	76.351	2.39e-138
CDO96779.1	267	jcf7180007781673	234	62.7715	3.35e-23
CDO96781.1	127	jcf7180007800066	130	74.0255	1.03e-48
CDO96782.1	524	jcf7180007709106	524	66.603	0
CDO96783.1	136	jcf7180007710444	101	86.139	4.54e-48
CDO96785.1	398	jcf7180007724871	601	46.8875	1.09e-15
CDO96786.1	478	jcf7180007789880	310	47.773	1.97e-62
CDO96787.1	349	jcf7180007725627	226	62.1455	1.95e-30
CDO96788.1	726	jcf7180007789880	306	45.5645	1.7e-54
CDO96789.1	801	jcf7180007789880	311	45.5385	3.21e-51
CDO96790.1	1887	jcf7180007832090	476	51.471	4.89e-129
CDO96791.1	121	jcf7180007783291	150	33.333	1.19e-18
CDO96792.1	173	jcf7180007725635	151	76.159	7.2e-63
CDO96793.1	1066	jcf7180007739827	745	51.066	2.29333e-21
CDO96794.1	446	jcf7180007710141	440	72.273	0
CDO96795.1	122	jcf7180007746548	96	45.833	2.41e-25
CDO96796.1	189	jcf7180007711709	190	85.789	2.93e-101
CDO96797.1	271	jcf7180007759778	97	87.629	5.08e-45
CDO96799.1	182	jcf7180007766514	91	86.813	3.39e-49
CDO96800.1	321	jcf7180007779558	191	85.864	1.39e-116
CDO96801.1	635	jcf7180007768663	200	46.5	1.74e-37
CDO96802.1	173	jcf7180007815468	165	67.273	8.7e-73
CDO96803.1	267	jcf7180007834356	258	38.372	4.78e-34
CDO96804.1	506	jcf7180007779453	324	45.062	1.02e-80
CDO96805.1	588	jcf7180007809995	851	62.9208	7.25e-12
CDO96806.1	433	jcf7180007715383	163	60.123	2.05e-73
CDO96807.1	675	jcf7180007710302	800	48.0245	8.63e-171
CDO96808.1	399	jcf7180007732130	262	52.2065	1.98e-18
CDO96809.1	711	jcf7180007748122	314	62.5677	1.26667e-32
CDO96810.1	237	jcf7180007786602	238	68.487	7.8e-107
CDO96811.1	259	jcf7180007730224	244	49.18	6.96e-68
CDO96812.1	457	jcf7180007724090	447	80.313	0
CDO96813.1	478	jcf7180007709148	463	87.041	0
CDO96814.1	325	jcf7180007796906	359	47.354	8.19e-101
CDO96815.1	432	jcf7180007761850	81	70.37	5.23e-28
CDO96816.1	524	jcf7180007761807	542	86.3854	9.6124e-24
CDO96817.1	629	jcf7180007761807	291	80.0097	3.73333e-44
CDO96818.1	107	jcf7180007788874	79	59.494	6.03e-25
CDO96819.1	268	jcf7180007765655	213	58.685	7.03e-84
CDO96820.1	575	jcf7180007779643	773	47.235	5.25e-15
CDO96821.1	857	jcf7180007793032	1181	34.3055	8.75e-19
CDO96822.1	177	jcf7180007728311	244	48.361	3.81e-62
CDO96823.1	1015	jcf7180007793032	1722	40.9765	2.14e-107
CDO96824.1	1165	jcf7180007793032	1194	48.492	0
CDO96825.1	770	jcf7180007779643	1676	35.6008	2.62038e-12
CDO96826.1	907	jcf7180007779643	2204	36.0825	6.40037e-14
CDO96827.1	1058	jcf7180007793032	1185	44.979	0
CDO96828.1	268	jcf7180007765655	213	58.216	2.23e-84
CDO96829.1	610	jcf7180007793032	1743	34.0152	4.34008e-15
CDO96830.1	526	jcf7180007793032	1748	32.7825	3.54e-12
CDO96831.1	426	jcf7180007750676	1870	34.3014	9.86012e-12
CDO96832.1	799	jcf7180007779643	2822	39.0224	1.68549e-12
CDO96833.1	187	jcf7180007779643	116	59.483	3.5e-41
CDO96834.1	411	jcf7180007750676	1239	36.9001	7.2233e-12
CDO96835.1	380	jcf7180007802503	170	76.6777	4.78e-56
CDO96836.1	617	jcf7180007820041	352	64.7483	2.94667e-15
CDO96837.1	238	jcf7180007782022	216	60.366	1.22e-16
CDO96838.1	210	jcf7180007834758	121	59.504	3.13e-33
CDO96839.1	284	jcf7180007778876	171	42.69	2.96e-18
CDO96840.1	885	jcf7180007835142	808	39.356	0
CDO96841.1	1164	jcf7180007779643	3405	37.1122	7.1156e-12
CDO96842.1	536	jcf7180007796202	913	39.402	4.705e-34
CDO96843.1	483	jcf7180007837871	380	75.789	7.15e-129
CDO96844.1	981	jcf7180007784412	782	49.469	0
CDO96845.1	376	jcf7180007837871	111	63.964	6.74e-25
CDO96846.1	253	jcf7180007791238	261	47.126	1.45e-48
CDO96848.1	111	jcf7180007724752	127	59.055	4.32e-41
CDO96849.1	390	jcf7180007724752	131	60.305	1.23e-40
CDO96850.1	143	jcf7180007726123	114	69.658	1.14e-30
CDO96851.1	291	jcf7180007789922	357	61.6375	6.5e-13
CDO96852.1	218	jcf7180007713100	145	93.793	6.58e-94
CDO96853.1	115	jcf7180007799142	59	88.136	2.81e-29
CDO96854.1	192	jcf7180007803417	84	87.7575	4.02e-33
CDO96855.1	499	jcf7180007803417	422	76.3279	5.4e-20
CDO96856.1	98	jcf7180007713600	98	61.224	2.37e-33
CDO96857.1	105	jcf7180007711102	94	59.574	5.16e-30
CDO96858.1	583	jcf7180007768017	583	62.2832	3.725e-14
CDO96859.1	799	jcf7180007779813	842	84.7603	1.02667e-37
CDO96860.1	457	jcf7180007783979	222	82.883	3.81e-127
CDO96861.1	409	jcf7180007823750	361	89.9153	1.81525e-19
CDO96863.1	215	jcf7180007788953	90	61.111	2.26e-30
CDO96864.1	113	jcf7180007718470	41	92.683	1.01e-19
CDO96865.1	1195	jcf7180007787119	1034	69.202	1.835e-57
CDO96867.1	721	jcf7180007789638	555	86.306	0
CDO96868.1	108	jcf7180007708387	99	76.1565	6.625e-17
CDO96869.1	461	jcf7180007789785	411	73.3477	2.31e-13
CDO96870.1	516	jcf7180007753301	516	73.062	0
CDO96872.1	429	jcf7180007788874	335	67.304	6.76667e-15
CDO96873.1	132	jcf7180007780637	93	43.011	3.02e-19
CDO96874.1	371	jcf7180007755601	408	55.017	4.79e-76
CDO96875.1	295	jcf7180007741724	326	86.1055	8.45e-24
CDO96876.1	688	jcf7180007741724	666	77.0183	2.44522e-20
CDO96877.1	293	jcf7180007750676	292	70.548	8.39e-111
CDO96878.1	284	jcf7180007785836	142	51.408	1.36e-34
CDO96880.1	265	jcf7180007785836	141	49.645	1.43e-34
CDO96881.1	672	jcf7180007708407	338	72.4698	6.4e-15
CDO96883.1	87	jcf7180007788874	89	65.169	3.77e-31
CDO96885.1	235	jcf7180007766741	205	70.9617	6.52333e-20
CDO96886.1	319	jcf7180007766741	234	70.732	6.5e-30
CDO96887.1	969	jcf7180007778872	345	43.188	3.4e-71
CDO96888.1	1019	jcf7180007778623	738	66.403	1.4678e-63
CDO96889.1	588	jcf7180007736814	363	31.405	3.37e-49
CDO96892.1	911	jcf7180007736814	290	42.414	1.62e-62
CDO96893.1	280	jcf7180007724940	140	88.616	5.75041e-31
CDO96894.1	554	jcf7180007736814	294	35.374	3.46e-42
CDO96895.1	326	jcf7180007789417	1598	34.8932	2.9e-14
CDO96896.1	765	jcf7180007719418	306	34.314	1.02e-40
CDO96897.1	536	jcf7180007749007	518	64.9533	5.56e-177
CDO96898.1	191	jcf7180007749007	108	55.6613	1.31e-23
CDO96899.1	683	jcf7180007782069	470	57.516	5.78e-136
CDO96900.1	200	jcf7180007793919	231	68.922	4.33e-70
CDO96901.1	241	jcf7180007793919	271	69.9157	3.61e-101
CDO96902.1	187	jcf7180007769623	107	74.766	2.59e-48
CDO96903.1	182	jcf7180007813653	162	78.6307	3.01667e-17
CDO96904.1	154	jcf7180007738070	167	53.5245	1.4e-13
CDO96905.1	102	jcf7180007736073	103	69.903	1.32e-44
CDO96906.1	466	jcf7180007820780	110	63.636	5.56e-29
CDO96907.1	266	jcf7180007724337	76	84.211	1.08e-32
CDO96908.1	130	jcf7180007823128	108	51.3595	1.42e-18
CDO96909.1	261	jcf7180007724480	257	69.65	2.09e-117
CDO96910.1	61	jcf7180007816737	244	59.8362	1.51675e-16
CDO96911.1	369	jcf7180007728031	330	41.1545	1.57e-44
CDO96912.1	366	jcf7180007788912	420	35.3937	6.27e-51
CDO96913.1	367	jcf7180007728031	381	47.2363	3.06667e-12
CDO96914.1	367	jcf7180007728031	383	45.6703	1.20333e-11
CDO96915.1	369	jcf7180007723684	381	48.0635	4.85e-68
CDO96916.1	219	jcf7180007801302	152	55.263	6.78e-38
CDO96917.1	198	jcf7180007814499	168	85.9558	5.976e-14
CDO96918.1	350	jcf7180007758753	267	73.9942	5.60118e-14
CDO96919.1	842	jcf7180007821282	858	71.2399	2.65e-22
CDO96920.1	1911	jcf7180007723664	847	80.351	7.12e-12
CDO96921.1	539	jcf7180007709182	239	85.9623	7.13333e-38
CDO96922.1	289	jcf7180007783563	165	71.928	4.9e-13
CDO96923.1	262	jcf7180007793793	167	55.689	1.39e-56
CDO96924.1	249	jcf7180007812318	199	97.5175	5.7e-31
CDO96925.1	512	jcf7180007790774	360	42.778	1.28e-90
CDO96926.1	775	jcf7180007788385	746	88.338	0
CDO96927.1	143	jcf7180007746650	87	90.805	5.32e-53
CDO96928.1	559	jcf7180007838587	367	75.204	9.11e-145
CDO96929.1	232	jcf7180007788460	170	58.235	6.14e-54
CDO96930.1	198	jcf7180007713705	156	87.821	8.12e-67
CDO96931.1	656	jcf7180007755961	467	70.3547	4.36667e-17
CDO96932.1	579	jcf7180007787233	1182	57.5448	1.59182e-11
CDO96933.1	344	jcf7180007785507	298	74.353	1.72e-11
CDO96934.1	290	jcf7180007725773	234	85.043	4.73e-129
CDO96935.1	501	jcf7180007741031	373	81.3948	4.66e-23
CDO96936.1	198	jcf7180007822379	146	77.784	2.395e-11
CDO96937.1	1020	jcf7180007708081	1037	71.745	0
CDO96938.1	199	jcf7180007721011	194	66.495	4.74e-83
CDO96939.1	199	jcf7180007721011	194	66.495	2.02e-83
CDO96940.1	1067	jcf7180007834608	474	69.922	2.2e-18
CDO96941.1	308	jcf7180007797067	274	65.4225	3.88e-80
CDO96942.1	388	jcf7180007788735	408	63.971	6.45e-116
CDO96943.1	334	jcf7180007712990	252	63.392	1.365e-19
CDO96944.1	2049	jcf7180007788865	1172	60.597	4.1175e-15
CDO96945.1	401	jcf7180007833477	100	42	2.93e-16
CDO96947.1	256	jcf7180007733082	93	87.199	3.43e-35
CDO96948.1	338	jcf7180007726323	290	72.834	3.02e-12
CDO96949.1	222	jcf7180007783968	68	77.941	5.01e-24
CDO96951.1	131	jcf7180007722231	138	59.42	9.21e-20
CDO96952.1	96	jcf7180007741512	78	48.718	4.36e-13
CDO96953.1	2014	jcf7180007783941	1404	56.1192	5.672e-17
CDO96954.1	543	jcf7180007728965	612	67.677	6.225e-23
CDO96955.1	273	jcf7180007816781	165	58.578	2.78e-42
CDO96956.1	104	jcf7180007752676	62	88.71	1.52e-29
CDO96957.1	391	jcf7180007752676	389	79.623	4e-19
CDO96958.1	268	jcf7180007737106	33	81.818	5.78e-11
CDO96959.1	442	jcf7180007713694	328	74.488	5.73334e-31
CDO96960.1	326	jcf7180007789597	267	79.775	2.05e-135
CDO96961.1	237	jcf7180007823020	101	77.255	6.23e-16
CDO96962.1	326	jcf7180007789597	267	76.404	4.68e-129
CDO96963.1	345	jcf7180007823020	326	70.4398	2.3575e-12
CDO96964.1	163	jcf7180007718587	152	34.211	2.22e-18
CDO96965.1	1101	jcf7180007791496	427	68.863	8.60504e-20
CDO96966.1	98	jcf7180007823134	96	84.375	2.84e-55
CDO96967.1	106	jcf7180007799685	105	67.619	2.01e-41
CDO96968.1	99	jcf7180007724122	93	88.172	4.74e-56
CDO96969.1	105	jcf7180007780873	204	57.8435	6e-30
CDO96970.1	102	jcf7180007780873	198	62.626	5.60009e-34
CDO96971.1	94	jcf7180007780083	88	56.818	9.67e-26
CDO96972.1	96	jcf7180007823134	94	54.255	2.17e-30
CDO96973.1	469	jcf7180007780873	465	74.839	0
CDO96974.1	275	jcf7180007780873	240	64.6135	1.17785e-40
CDO96975.1	105	jcf7180007753844	105	97.143	1.88e-66
CDO96976.1	147	jcf7180007779343	101	89.81	1.045e-15
CDO96977.1	560	jcf7180007789426	554	83.574	0
CDO96978.1	698	jcf7180007780510	822	67.9255	1.12667e-36
CDO96979.1	589	jcf7180007780585	339	83.776	1.17e-164
CDO96980.1	312	jcf7180007789642	305	49.508	1.05e-88
CDO96981.1	339	jcf7180007738413	175	68.134	2.505e-24
CDO96982.1	729	jcf7180007728005	736	82.88	0
CDO96983.1	327	jcf7180007745073	204	77.482	3.53376e-34
CDO96984.1	87	jcf7180007800775	111	65.766	1.6e-37
CDO96985.1	288	jcf7180007800775	158	64.113	6.00108e-15
CDO96987.1	116	jcf7180007805490	45	88.889	1.68e-20
CDO96988.1	961	jcf7180007836336	1286	67.4246	2.52238e-17
CDO96990.1	212	jcf7180007709317	214	69.3783	1.11e-58
CDO96991.1	308	jcf7180007792751	369	77.5537	2.21e-18
CDO96992.1	253	jcf7180007794930	177	38.983	2.71e-20
CDO96993.1	499	jcf7180007754814	515	83.204	2.725e-37
CDO96994.1	254	jcf7180007779184	396	68.273	1.20667e-12
CDO96995.1	1355	jcf7180007795520	775	48.903	0
CDO96997.1	337	jcf7180007753239	80	91.25	3.78e-46
CDO96998.1	445	jcf7180007730336	489	61.1971	4.45715e-14
CDO96999.1	263	jcf7180007796561	172	68.095	1.09e-13
CDO97000.1	379	jcf7180007787941	195	56.1365	3.84e-42
CDO97001.1	492	jcf7180007711354	256	84.35	1.148e-18
CDO97002.1	1079	jcf7180007798205	193	66.321	1.64e-49
CDO97003.1	235	jcf7180007729724	214	70.5855	2.34e-53
CDO97004.1	123	jcf7180007813768	37	86.486	1.06e-13
CDO97005.1	197	jcf7180007813768	141	73.4763	2.64475e-12
CDO97006.1	199	jcf7180007729484	55	72.727	2.29e-18
CDO97007.1	204	jcf7180007753083	209	67.183	1.077e-31
CDO97008.1	829	jcf7180007708957	495	73.298	8.27501e-20
CDO97009.1	312	jcf7180007820279	276	36.232	4.91e-40
CDO97010.1	471	jcf7180007785858	197	71.695	8.91e-67
CDO97011.1	486	jcf7180007801380	235	81.6925	2.3e-24
CDO97012.1	216	jcf7180007750968	143	79.1025	7.77e-60
CDO97013.1	730	jcf7180007738048	746	61.88	1.36818e-12
CDO97014.1	951	jcf7180007788717	600	54.763	3.65e-19
CDO97015.1	668	jcf7180007792828	314	62.102	2.53e-88
CDO97016.1	906	jcf7180007718241	643	82.3345	3.82e-15
CDO97017.1	648	jcf7180007712009	151	70.199	2.24e-54
CDO97018.1	862	jcf7180007788621	838	76.85	0
CDO97019.1	399	jcf7180007802473	533	71.457	4.2e-16
CDO97020.1	406	jcf7180007715345	127	61.654	3.0454e-14
CDO97021.1	108	jcf7180007715345	65	61.538	2.53e-19
CDO97022.1	133	jcf7180007715345	82	53.659	1.49e-18
CDO97023.1	162	jcf7180007758693	57	56.14	6.2e-16
CDO97024.1	436	jcf7180007756356	339	83.1827	3.96667e-13
CDO97025.1	399	jcf7180007801991	197	91.7345	5.5474e-27
CDO97026.1	1140	jcf7180007784412	770	86.4505	2.95e-98
CDO97027.1	498	jcf7180007745518	484	78.017	0
CDO97028.1	254	jcf7180007765187	112	74.107	5.9e-52
CDO97030.1	522	jcf7180007708587	319	34.169	1.1e-43
CDO97031.1	690	jcf7180007724367	401	36.658	1.09e-62
CDO97032.1	194	jcf7180007720126	163	92.2975	2.16e-29
CDO97033.1	825	jcf7180007780918	275	72.3215	9.05e-25
CDO97034.1	308	jcf7180007835753	293	47.5435	3.96e-15
CDO97035.1	312	jcf7180007835753	337	70.4196	9e-22
CDO97036.1	296	jcf7180007754021	296	73.311	1.29e-135
CDO97037.1	566	jcf7180007754021	641	73.9615	0
CDO97038.1	346	jcf7180007782015	351	77.5552	1.10244e-18
CDO97039.1	177	jcf7180007790126	195	62.7625	1.83e-12
CDO97040.1	432	jcf7180007787997	463	64.2034	6.36e-30
CDO97041.1	97	jcf7180007712396	66	75.758	4.81e-30
CDO97042.1	299	jcf7180007807302	217	55.76	1.71e-69
CDO97043.1	287	jcf7180007807302	190	54.211	2.97e-64
CDO97044.1	518	jcf7180007709666	487	84.394	0
CDO97045.1	93	jcf7180007792006	125	58.4	1.2e-35
CDO97048.1	160	jcf7180007716633	106	75.7125	2.185e-15
CDO97049.1	881	jcf7180007730270	643	82.818	4.885e-17
CDO97050.1	111	jcf7180007730270	57	70.175	2.93e-20
CDO97051.1	165	jcf7180007822252	75	54.667	3.59e-13
CDO97052.1	493	jcf7180007793379	347	72.4373	2.29716e-32
CDO97054.1	316	jcf7180007716540	312	71.9285	7.55e-18
CDO97055.1	158	jcf7180007763414	94	75.532	2.28e-45
CDO97056.1	489	jcf7180007787076	284	61.1185	6.7e-87
CDO97057.1	479	jcf7180007814478	381	69.055	2e-19
CDO97058.1	450	jcf7180007820071	341	87.69	4.03333e-56
CDO97059.1	377	jcf7180007793212	407	84.2145	6.5125e-12
CDO97060.1	284	jcf7180007714370	203	66.995	4.41e-92
CDO97061.1	889	jcf7180007757077	301	69.187	1.72e-33
CDO97062.1	475	jcf7180007760687	306	43.464	5.12e-75
CDO97063.1	206	jcf7180007800873	234	77.5617	3.20333e-14
CDO97064.1	892	jcf7180007779116	723	65.3764	1.5156e-33
CDO97065.1	125	jcf7180007709629	102	43.137	1.22e-13
CDO97066.1	309	jcf7180007766954	233	55.794	2.31e-72
CDO97067.1	418	jcf7180007781619	211	57.82	5.7e-51
CDO97068.1	321	jcf7180007711881	210	66.667	1.24e-98
CDO97069.1	41	jcf7180007781695	41	87.805	2.54e-18
CDO97070.1	332	jcf7180007742528	182	85.5952	9.275e-12
CDO97071.1	261	jcf7180007825229	231	65.914	1.54467e-31
CDO97072.1	144	jcf7180007758355	145	87.586	2.2e-77
CDO97073.1	321	jcf7180007787899	331	61.329	1.13e-107
CDO97074.1	2025	jcf7180007789475	430	79.5637	1.705e-47
CDO97075.1	529	jcf7180007747023	372	79.301	0
CDO97076.1	437	jcf7180007823996	200	61	2.88e-66
CDO97077.1	682	jcf7180007751600	1529	43.1685	1.1535e-15
CDO97079.1	430	jcf7180007791719	366	77.322	0
CDO97080.1	197	jcf7180007783089	181	72.216	1.545e-17
CDO97081.1	275	jcf7180007825088	178	77.528	2.49e-81
CDO97082.1	439	jcf7180007790429	199	68.837	2.61e-49
CDO97083.1	297	jcf7180007837752	333	45.946	2.76e-77
CDO97084.1	370	jcf7180007747115	370	87.838	0
CDO97085.1	370	jcf7180007797049	372	77.1787	1.74333e-12
CDO97086.1	758	jcf7180007793315	64	82.813	1.1e-28
CDO97087.1	216	jcf7180007785385	198	65.152	5.29e-75
CDO97088.1	598	jcf7180007748573	492	76.583	1.696e-12
CDO97089.1	514	jcf7180007748573	484	73.4303	9.6e-30
CDO97090.1	487	jcf7180007779722	476	73.3992	9.55e-56
CDO97091.1	90	jcf7180007779722	87	60.873	5.45e-18
CDO97092.1	381	jcf7180007779722	484	71.6403	7.7e-25
CDO97093.1	481	jcf7180007708462	280	74.0308	2.76067e-16
CDO97094.1	256	jcf7180007836531	116	50	5.25e-24
CDO97095.1	590	jcf7180007717428	159	93.082	1.06e-105
CDO97096.1	397	jcf7180007780507	357	56.5322	1.8e-23
CDO97097.1	603	jcf7180007729772	522	40.2277	5.03333e-24
CDO97098.1	291	jcf7180007710138	200	63.5	2.57e-63
CDO97099.1	135	jcf7180007721906	79	58.0105	8.35e-15
CDO97100.1	175	jcf7180007710870	146	46.575	3.69e-34
CDO97101.1	183	jcf7180007805829	138	54.348	6.11e-39
CDO97102.1	238	jcf7180007791659	225	92	2.18e-152
CDO97103.1	507	jcf7180007755953	458	65.721	0
CDO97104.1	154	jcf7180007713595	179	76.559	4.52e-15
CDO97105.1	433	jcf7180007784436	380	71.579	2.03e-129
CDO97106.1	659	jcf7180007712081	195	73.1153	1.82e-66
CDO97107.1	204	jcf7180007712081	84	76.19	4.49e-29
CDO97108.1	488	jcf7180007815406	476	72.479	0
CDO97109.1	484	jcf7180007815406	469	70.149	0
CDO97110.1	280	jcf7180007709559	107	57.944	1.12e-30
CDO97111.1	463	jcf7180007823105	459	70.37	0
CDO97112.1	886	jcf7180007743038	996	65.5742	1.42333e-20
CDO97114.1	3641	jcf7180007791717	3315	79.9204	5.71688e-13
CDO97115.1	647	jcf7180007788733	902	50.231	1.785e-35
CDO97116.1	300	jcf7180007780027	298	65.436	2.1e-122
CDO97117.1	446	jcf7180007780027	441	75.057	0
CDO97118.1	125	jcf7180007780027	125	82.4	1.15e-57
CDO97119.1	76	jcf7180007764463	45	82.222	5.21e-20
CDO97120.1	83	jcf7180007764463	84	85.714	2.19e-44
CDO97121.1	85	jcf7180007729495	83	72.289	1.98e-29
CDO97122.1	707	jcf7180007812722	1439	30.9503	2.36667e-35
CDO97123.1	254	jcf7180007718443	136	38.235	6.98e-16
CDO97124.1	237	jcf7180007744149	145	81.5095	4.64e-62
CDO97125.1	1054	jcf7180007711337	754	80.1964	4.27586e-17
CDO97126.1	608	jcf7180007792841	419	62.768	8.69e-171
CDO97128.1	427	jcf7180007734635	67	82.09	7.97e-28
CDO97129.1	352	jcf7180007781056	357	80.5333	4.04e-157
CDO97130.1	292	jcf7180007821852	108	64.815	1.46e-41
CDO97132.1	2949	jcf7180007802657	418	61.244	5.92e-138
CDO97133.1	202	jcf7180007708384	101	74.257	7.53e-38
CDO97135.1	224	jcf7180007790087	159	72.4355	1.62e-14
CDO97136.1	736	jcf7180007797124	232	63.606	1.03333e-11
CDO97137.1	235	jcf7180007712380	110	51.818	9.13e-25
CDO97138.1	363	jcf7180007717066	273	44.322	2e-62
CDO97139.1	209	jcf7180007787526	117	64.103	1.16e-47
CDO97140.1	467	jcf7180007787526	468	63.248	0
CDO97141.1	553	jcf7180007808186	178	66.3437	2.26367e-19
CDO97142.1	419	jcf7180007782918	123	88.1445	4.61e-18
CDO97143.1	432	jcf7180007749106	209	72.8175	7.18697e-15
CDO97144.1	315	jcf7180007765697	258	79.664	5e-28
CDO97145.1	214	jcf7180007711431	48	75	1.19e-16
CDO97146.1	361	jcf7180007729317	288	81.523	3.535e-28
CDO97147.1	464	jcf7180007787241	370	68.53	2.824e-13
CDO97148.1	137	jcf7180007737660	55	63.636	2.62e-18
CDO97149.1	226	jcf7180007824902	158	47.468	7.53e-31
CDO97150.1	597	jcf7180007797123	419	63.8167	7.26667e-46
CDO97151.1	461	jcf7180007788076	403	86.6	0
CDO97152.1	261	jcf7180007726061	292	66.025	3.53333e-22
CDO97153.1	326	jcf7180007815192	376	56.649	1.3e-100
CDO97155.1	429	jcf7180007812295	240	70.3635	1.205e-16
CDO97156.1	438	jcf7180007713870	170	83.529	2.98e-92
CDO97157.1	343	jcf7180007736315	168	85.2263	2.21e-69
CDO97158.1	348	jcf7180007791287	333	67.568	3.45e-149
CDO97159.1	319	jcf7180007791287	316	63.608	6.48e-137
CDO97160.1	1055	jcf7180007783228	724	77.706	2.5125e-21
CDO97162.1	421	jcf7180007821037	152	73.026	1.07e-64
CDO97163.1	742	jcf7180007778956	535	39.5467	6.73334e-20
CDO97164.1	320	jcf7180007724313	275	54.9614	2.688e-12
CDO97165.1	634	jcf7180007720590	137	88.998	3.93e-20
CDO97166.1	1996	jcf7180007784808	745	55.034	0
CDO97167.1	140	jcf7180007798748	133	72.18	4.06e-43
CDO97168.1	928	jcf7180007714711	219	64.185	7.36e-64
CDO97169.1	187	jcf7180007736334	183	76.503	1e-88
CDO97170.1	213	jcf7180007716722	148	57.432	8.62e-20
CDO97171.1	517	jcf7180007796466	323	57.685	1.35333e-44
CDO97174.1	646	jcf7180007766202	503	92.068	4.99e-51
CDO97176.1	294	jcf7180007711503	168	44.048	8.07e-32
CDO97177.1	475	jcf7180007787859	367	70.9817	2.82667e-46
CDO97178.1	483	jcf7180007790735	297	87.897	1.13e-58
CDO97179.1	509	jcf7180007787879	292	79.503	1.4525e-14
CDO97180.1	286	jcf7180007823193	188	32.447	1.98e-13
CDO97181.1	158	jcf7180007785503	83	56.627	3.85e-17
CDO97182.1	431	jcf7180007733980	384	67.969	4.37e-130
CDO97183.1	467	jcf7180007788176	250	68.2057	1.9575e-12
CDO97184.1	517	jcf7180007792014	451	83.9228	3.26e-19
CDO97185.1	176	jcf7180007793767	106	83.962	1.16e-59
CDO97186.1	527	jcf7180007778755	526	73.194	0
CDO97187.1	668	jcf7180007714974	484	67.7077	4.46667e-13
CDO97188.1	450	jcf7180007819851	287	63.753	2.05e-96
CDO97189.1	412	jcf7180007787591	417	83.693	0
CDO97190.1	300	jcf7180007731287	281	58.7905	5.05e-17
CDO97191.1	544	jcf7180007735443	556	64.8083	1.1875e-16
CDO97192.1	435	jcf7180007758837	113	82.301	2.14e-61
CDO97193.1	247	jcf7180007746647	287	81.234	6.54e-112
CDO97194.1	144	jcf7180007791118	143	97.902	1.32e-95
CDO97195.1	324	jcf7180007709533	270	48.519	7.41e-69
CDO97196.1	768	jcf7180007757437	600	58.3375	1.065e-23
CDO97197.1	1108	jcf7180007779704	803	85.2173	2.3e-55
CDO97198.1	653	jcf7180007791101	668	65.1917	6.93333e-17
CDO97200.1	654	jcf7180007791101	668	66.7817	3.43333e-17
CDO97202.1	247	jcf7180007782889	113	59.618	7.43e-22
CDO97203.1	492	jcf7180007764067	424	63.208	0
CDO97204.1	325	jcf7180007713255	260	64.231	4.25e-84
CDO97205.1	446	jcf7180007793902	372	73.656	0
CDO97206.1	462	jcf7180007779453	308	49.675	3.75e-95
CDO97207.1	617	jcf7180007797757	247	70.8007	2.52667e-15
CDO97208.1	240	jcf7180007749077	43	83.721	7.52e-19
CDO97209.1	319	jcf7180007726256	233	86.3835	2.705e-39
CDO97211.1	412	jcf7180007740013	226	65.9835	4.37e-31
CDO97212.1	389	jcf7180007746617	366	73.77	0
CDO97213.1	158	jcf7180007714680	70	71.6505	1.52e-18
CDO97214.1	143	jcf7180007714680	38	84.211	1.64e-13
CDO97215.1	582	jcf7180007808874	141	73.759	1.57e-45
CDO97216.1	602	jcf7180007789773	459	78.1187	1e-74
CDO97217.1	266	jcf7180007779683	291	69.416	4.86e-135
CDO97218.1	759	jcf7180007836425	559	53.667	8.8e-155
CDO97219.1	290	jcf7180007724952	155	91.439	1.035e-30
CDO97220.1	335	jcf7180007766131	335	70.448	2.6e-166
CDO97221.1	243	jcf7180007786424	61	62.295	3.44e-18
CDO97222.1	263	jcf7180007715394	34	85.294	6.04e-11
CDO97223.1	357	jcf7180007802128	149	89.933	7.66e-89
CDO97224.1	477	jcf7180007736838	516	59.2887	5.24217e-20
CDO97225.1	483	jcf7180007781661	475	69.684	0
CDO97226.1	400	jcf7180007781287	261	70.8253	1.1975e-17
CDO97227.1	400	jcf7180007781287	254	74.7713	4.525e-21
CDO97228.1	419	jcf7180007712380	341	74.9243	2.11e-26
CDO97229.1	229	jcf7180007820641	208	78.846	3.78e-126
CDO97230.1	1128	jcf7180007794313	368	62.1043	1.96667e-24
CDO97231.1	224	jcf7180007761146	72	86.111	1.86815e-12
CDO97232.1	82	jcf7180007709558	115	54.783	1.26e-30
CDO97233.1	543	jcf7180007787401	555	65.766	0
CDO97236.1	837	jcf7180007779275	928	69.2857	2.69732e-14
CDO97237.1	93	jcf7180007757914	122	43.443	1.03e-11
CDO97238.1	167	jcf7180007715429	173	52.601	7.15e-42
CDO97239.1	288	jcf7180007767613	60	90	9.13e-19
CDO97240.1	385	jcf7180007731949	220	67.2097	7.125e-19
CDO97241.1	881	jcf7180007798935	599	54.7193	2.35667e-35
CDO97242.1	270	jcf7180007798321	317	79.0025	1.18e-132
CDO97243.1	235	jcf7180007798321	235	88.936	3.86e-145
CDO97244.1	390	jcf7180007738211	80	81.25	1.66e-35
CDO97245.1	625	jcf7180007816293	399	48.003	3.08e-49
CDO97246.1	213	jcf7180007794959	71	78.873	3.41e-27
CDO97247.1	89	jcf7180007781699	47	82.979	3.4e-20
CDO97248.1	810	jcf7180007789441	585	57.024	6.05667e-23
CDO97249.1	491	jcf7180007788825	524	83.7855	1.255e-37
CDO97251.1	69	jcf7180007818065	40	95	9.47e-20
CDO97252.1	832	jcf7180007801121	784	77.423	0
CDO97253.1	387	jcf7180007798066	373	84.182	0
CDO97254.1	132	jcf7180007726749	69	85.4795	2.16e-24
CDO97255.1	394	jcf7180007837605	340	64.2455	1.93e-49
CDO97256.1	467	jcf7180007783810	442	38.688	1.17e-90
CDO97257.1	315	jcf7180007823184	145	57.931	1.68e-46
CDO97258.1	213	jcf7180007831932	1398	35.7106	1.65181e-12
CDO97259.1	259	jcf7180007751594	121	79.0085	1.575e-17
CDO97260.1	448	jcf7180007800838	338	72.485	1.27e-153
CDO97262.1	393	jcf7180007723717	336	54.762	1.62e-109
CDO97264.1	260	jcf7180007766453	30	93.333	6.14e-11
CDO97265.1	163	jcf7180007766453	149	74.7497	5.85e-48
CDO97266.1	56	jcf7180007721640	33	100	1.38e-14
CDO97267.1	650	jcf7180007758672	477	80.922	0
CDO97268.1	189	jcf7180007725936	143	77.451	1.39e-53
CDO97269.1	622	jcf7180007784031	590	80.6385	4.525e-80
CDO97271.1	394	jcf7180007812178	373	85.6723	7.8125e-16
CDO97272.1	341	jcf7180007713724	93	91.398	1.77e-50
CDO97273.1	343	jcf7180007731124	236	80.3312	2.04e-12
CDO97274.1	412	jcf7180007789985	372	66.8072	1.1e-58
CDO97275.1	630	jcf7180007714358	230	93.913	1.76e-159
CDO97276.1	686	jcf7180007721085	262	62.214	3.6e-101
CDO97277.1	802	jcf7180007787841	801	67.4435	2.635e-140
CDO97278.1	118	jcf7180007734049	83	68.675	1.59e-28
CDO97279.1	373	jcf7180007719050	402	82.4394	2.02533e-12
CDO97281.1	332	jcf7180007752156	136	61.765	1.93e-27
CDO97282.1	166	jcf7180007821347	210	59.524	3.79e-82
CDO97283.1	705	jcf7180007791961	344	77.4403	6.33336e-21
CDO97284.1	213	jcf7180007791961	55	70.909	2.59e-17
CDO97285.1	551	jcf7180007723930	505	57.8233	3.19e-160
CDO97286.1	193	jcf7180007711432	117	79.345	7.65e-13
CDO97287.1	661	jcf7180007783746	95	60	2.06e-27
CDO97288.1	304	jcf7180007723708	66	69.697	1.01e-23
CDO97291.1	528	jcf7180007783673	304	59.348	5.5e-26
CDO97292.1	352	jcf7180007712988	322	62.3217	2.305e-23
CDO97293.1	387	jcf7180007820101	295	38.0655	1.39e-40
CDO97294.1	134	jcf7180007783513	94	58.511	1.56e-27
CDO97299.1	85	jcf7180007763153	39	74.359	3.49e-14
CDO97300.1	183	jcf7180007730634	147	42.177	1.25e-11
CDO97301.1	871	jcf7180007779245	242	50.3207	8.75e-25
CDO97302.1	456	jcf7180007741044	352	82.9878	4.375e-23
CDO97303.1	530	jcf7180007761768	426	58.92	1.67e-145
CDO97304.1	204	jcf7180007816630	54	70.37	5.3e-18
CDO97305.1	450	jcf7180007740763	546	72.984	7.36667e-14
CDO97307.1	401	jcf7180007781559	346	46.243	4.06e-83
CDO97308.1	229	jcf7180007805802	76	80.263	3.3e-30
CDO97309.1	586	jcf7180007740476	477	67.3782	1.465e-11
CDO97311.1	322	jcf7180007783105	230	43.043	8.61e-49
CDO97312.1	2214	jcf7180007756086	1143	79.9597	1.20833e-24
CDO97313.1	275	jcf7180007718361	104	89.5085	7.35e-15
CDO97314.1	474	jcf7180007835588	96	48.958	5.24e-17
CDO97315.1	810	jcf7180007733630	224	57.143	1.91e-61
CDO97317.1	675	jcf7180007714704	428	50.234	1.17e-123
CDO97318.1	205	jcf7180007782801	181	42.541	6.14e-35
CDO97319.1	223	jcf7180007712141	193	38.342	4.38e-35
CDO97320.1	236	jcf7180007782801	162	40.123	2.23e-22
CDO97321.1	448	jcf7180007758944	441	74.2027	3.46667e-24
CDO97322.1	296	jcf7180007709941	201	78.8035	6.25e-29
CDO97323.1	163	jcf7180007788150	140	85	1.13e-72
CDO97324.1	166	jcf7180007788150	142	71.127	3.72e-66
CDO97325.1	162	jcf7180007806028	163	69.939	9.58e-77
CDO97326.1	161	jcf7180007723797	159	72.956	1.25e-72
CDO97328.1	537	jcf7180007797224	149	70.47	2.79e-59
CDO97329.1	261	jcf7180007728429	126	88.095	2.96e-67
CDO97330.1	427	jcf7180007832642	196	66.3265	1.58e-53
CDO97331.1	252	jcf7180007832642	93	53.763	2.22e-16
CDO97332.1	535	jcf7180007789614	462	76.7492	1.69e-11
CDO97333.1	669	jcf7180007734051	348	67.937	4.6e-14
CDO97334.1	417	jcf7180007835064	250	78.9067	2.2325e-11
CDO97335.1	1050	jcf7180007790948	1072	65.858	0
CDO97336.1	356	jcf7180007711039	314	63.057	1.01e-136
CDO97337.1	432	jcf7180007814357	395	80.2295	1.025e-51
CDO97338.1	333	jcf7180007736453	343	56.268	9.11e-100
CDO97339.1	322	jcf7180007783453	149	80.974	1.045e-24
CDO97340.1	540	jcf7180007791040	210	68.257	4.74671e-25
CDO97341.1	292	jcf7180007712119	51	62.745	1.76e-16
CDO97342.1	295	jcf7180007712119	139	84.869	1.105e-27
CDO97343.1	543	jcf7180007806561	96	57.292	3.25e-23
CDO97344.1	737	jcf7180007741089	483	79.875	3.18778e-14
CDO97345.1	219	jcf7180007744779	178	80.7923	6.86667e-19
CDO97346.1	555	jcf7180007820481	374	82.353	0
CDO97347.1	398	jcf7180007708842	398	72.362	0
CDO97348.1	179	jcf7180007708842	171	50.877	9.73e-50
CDO97349.1	404	jcf7180007791328	185	70.811	4.94e-86
CDO97350.1	374	jcf7180007732553	226	73.1248	3.58e-12
CDO97351.1	608	jcf7180007779441	133	79.0547	1.5e-46
CDO97352.1	474	jcf7180007708441	444	71.835	4.86e-70
CDO97354.1	587	jcf7180007746288	585	74.53	0
CDO97355.1	1299	jcf7180007786007	1143	73.2919	7.87537e-26
CDO97356.1	681	jcf7180007711071	658	75.63	6.2e-78
CDO97357.1	457	jcf7180007737401	203	90.148	2.11e-120
CDO97358.1	309	jcf7180007783500	247	68.421	1.48e-88
CDO97359.1	376	jcf7180007708352	405	47.407	1.06e-126
CDO97361.1	371	jcf7180007802005	66	83.333	1.53e-18
CDO97362.1	317	jcf7180007779199	164	69.0525	5.92e-46
CDO97363.1	536	jcf7180007709516	374	66.5983	8.53e-118
CDO97365.1	165	jcf7180007791862	87	60.218	1.01e-13
CDO97366.1	102	jcf7180007778772	66	84.848	7.37e-31
CDO97367.1	595	jcf7180007781675	494	80.6925	0
CDO97368.1	282	jcf7180007742938	311	44.695	5.36e-55
CDO97369.1	326	jcf7180007833937	303	55.776	4.64e-55
CDO97370.1	832	jcf7180007721390	350	58.286	3.72e-140
CDO97371.1	541	jcf7180007721390	350	61.429	6.75e-162
CDO97372.1	205	jcf7180007714497	137	81.135	5.45e-56
CDO97373.1	146	jcf7180007812538	89	59.551	6.66e-20
CDO97374.1	243	jcf7180007834785	249	48.594	1.28e-65
CDO97375.1	836	jcf7180007794249	892	66.2927	5.91113e-12
CDO97376.1	369	jcf7180007758140	38	86.842	1.37e-15
CDO97377.1	102	jcf7180007825229	96	75.7085	1.05e-33
CDO97378.1	144	jcf7180007758355	145	87.586	2.84e-74
CDO97379.1	328	jcf7180007812431	187	87.98	1.075e-15
CDO97380.1	93	jcf7180007710194	74	78.378	6.1e-33
CDO97381.1	664	jcf7180007750774	220	61.818	3.02e-56
CDO97382.1	465	jcf7180007790031	458	43.45	1.11e-123
CDO97383.1	369	jcf7180007827805	224	93.725	9.87e-120
CDO97384.1	242	jcf7180007728193	252	70.463	4.42e-80
CDO97385.1	695	jcf7180007728193	510	68.071	3.415e-33
CDO97386.1	422	jcf7180007794617	307	88.3197	4.475e-47
CDO97388.1	189	jcf7180007715303	94	74.2595	5.17e-16
CDO97389.1	510	jcf7180007832717	319	45.2035	3.72e-15
CDO97390.1	875	jcf7180007737038	133	38.346	1.27e-14
CDO97391.1	447	jcf7180007724504	98	72.5	9.96e-33
CDO97392.1	264	jcf7180007785264	60	96.667	5.01e-31
CDO97393.1	311	jcf7180007764396	165	60.1175	1.21573e-19
CDO97394.1	1873	jcf7180007788645	1466	84.1328	5.72456e-27
CDO97395.1	405	jcf7180007780925	411	58.151	4.21e-153
CDO97396.1	36	jcf7180007780925	36	88.889	1.59e-13
CDO97397.1	112	jcf7180007717669	35	82.857	6.84e-13
CDO97398.1	216	jcf7180007717053	220	54.545	1.24e-54
CDO97399.1	665	jcf7180007733087	682	84.1924	1.852e-14
CDO97400.1	534	jcf7180007709494	394	70.558	3.87e-175
CDO97401.1	470	jcf7180007710590	472	74.389	8.20009e-41
CDO97403.1	409	jcf7180007736369	263	75.8935	9.1e-28
CDO97406.1	365	jcf7180007757736	348	62.2653	3.2e-19
CDO97407.1	343	jcf7180007812177	298	35.906	8.58e-46
CDO97408.1	343	jcf7180007791111	320	37.98	4.37e-47
CDO97409.1	412	jcf7180007833205	411	55.718	1.84e-91
CDO97411.1	414	jcf7180007732557	451	47.894	6.74e-138
CDO97412.1	552	jcf7180007712504	575	82.2686	1.312e-20
CDO97413.1	562	jcf7180007793222	196	88.265	8.08e-95
CDO97414.1	660	jcf7180007808112	266	74.9365	6.975e-26
CDO97415.1	271	jcf7180007712412	219	57.8433	3.22667e-14
CDO97416.1	199	jcf7180007791383	197	65.6055	2.64e-26
CDO97417.1	293	jcf7180007728025	185	74.8665	2.89595e-32
CDO97418.1	131	jcf7180007793600	158	68.904	6.55e-12
CDO97419.1	667	jcf7180007786927	633	67.141	0
CDO97420.1	359	jcf7180007728558	318	81.769	2.66473e-30
CDO97421.1	411	jcf7180007826352	214	70.859	1.09e-14
CDO97423.1	142	jcf7180007802102	82	69.512	4.88e-29
CDO97424.1	1141	jcf7180007834607	1238	59.8311	8.26667e-137
CDO97425.1	335	jcf7180007734425	268	78.0955	1.58e-17
CDO97426.1	487	jcf7180007788186	519	60.308	0
CDO97427.1	361	jcf7180007788186	407	51.106	3.56e-144
CDO97431.1	330	jcf7180007788186	403	44.665	5.14e-95
CDO97432.1	477	jcf7180007788186	527	55.977	0
CDO97433.1	439	jcf7180007790662	325	89.8763	1.91333e-12
CDO97434.1	780	jcf7180007816928	286	64.685	5.53e-74
CDO97435.1	366	jcf7180007711022	222	46.254	4.77e-42
CDO97436.1	374	jcf7180007800859	826	52.9393	3.63725e-21
CDO97437.1	386	jcf7180007800859	564	66.9862	2.72e-26
CDO97438.1	375	jcf7180007711022	217	46.03	1.86e-41
CDO97439.1	161	jcf7180007809258	114	64.035	7.41e-36
CDO97440.1	187	jcf7180007812800	75	70.667	4.69e-26
CDO97441.1	343	jcf7180007801220	244	60.246	2.37e-95
CDO97442.1	69	jcf7180007717484	61	72.5565	4.43e-15
CDO97443.1	601	jcf7180007782800	542	68.1826	1.92201e-15
CDO97445.1	279	jcf7180007710547	257	45.914	3.81e-64
CDO97446.1	299	jcf7180007834784	270	50.37	7.99e-80
CDO97447.1	364	jcf7180007753593	123	96.748	1.83e-81
CDO97448.1	1062	jcf7180007798117	662	73.0753	7.375e-20
CDO97449.1	348	jcf7180007790413	164	94.512	9.69e-104
CDO97450.1	232	jcf7180007725614	214	63.519	3.28e-15
CDO97451.1	718	jcf7180007747551	395	36.456	1.92e-67
CDO97452.1	855	jcf7180007709403	443	60.261	2.995e-20
CDO97453.1	327	jcf7180007738802	63	76.3045	7.04e-15
CDO97454.1	340	jcf7180007813525	176	80.682	9.14e-94
CDO97455.1	404	jcf7180007761427	72	61.111	2.98e-20
CDO97456.1	135	jcf7180007790583	46	76.087	6.92e-16
CDO97457.1	644	jcf7180007806720	815	71.0697	3.225e-26
CDO97458.1	689	jcf7180007812234	510	61.5242	1.29992e-11
CDO97459.1	227	jcf7180007780221	129	67.8725	4.3e-12
CDO97460.1	386	jcf7180007797897	135	45.926	9e-25
CDO97461.1	452	jcf7180007778787	354	76.1428	1.6175e-15
CDO97462.1	639	jcf7180007708337	318	42.702	3.9e-64
CDO97463.1	329	jcf7180007837396	359	69.2055	1.34e-129
CDO97464.1	262	jcf7180007837396	299	66.532	1.74e-102
CDO97465.1	299	jcf7180007748715	346	39.4987	1.41337e-22
CDO97466.1	440	jcf7180007794379	442	76.923	3.42e-147
CDO97467.1	229	jcf7180007790753	83	96.386	1.85e-44
CDO97468.1	203	jcf7180007790753	177	83.3115	1.54e-68
CDO97469.1	656	jcf7180007722804	239	39.749	1.82e-42
CDO97471.1	181	jcf7180007820215	89	93.258	1.15e-49
CDO97472.1	658	jcf7180007795703	300	78.647	8.98e-105
CDO97473.1	167	jcf7180007803151	179	73.3273	4.13333e-16
CDO97474.1	258	jcf7180007791975	221	51.584	3.78e-75
CDO97475.1	479	jcf7180007788099	479	82.463	0
CDO97476.1	446	jcf7180007746623	270	56.667	2.67e-96
CDO97477.1	348	jcf7180007723991	162	77.2873	8.03333e-24
CDO97478.1	617	jcf7180007820041	349	65.2673	4.1e-20
CDO97479.1	706	jcf7180007820855	757	46.5733	2.35e-177
CDO97480.1	645	jcf7180007751769	636	76.101	0
CDO97481.1	339	jcf7180007806142	126	57.937	3.84e-40
CDO97482.1	704	jcf7180007750578	511	81.4327	2.34292e-20
CDO97483.1	500	jcf7180007717980	361	75.7825	7.3e-67
CDO97485.1	192	jcf7180007752317	81	45.679	2.61e-16
CDO97486.1	190	jcf7180007712420	82	74.39	1.5e-35
CDO97487.1	136	jcf7180007712420	48	70.833	7.15e-14
CDO97488.1	377	jcf7180007790791	184	75	3.87e-55
CDO97489.1	412	jcf7180007737268	62	79.032	5.14e-24
CDO97491.1	572	jcf7180007789422	624	44.551	1.01e-148
CDO97492.1	323	jcf7180007790013	319	50.0025	5.52e-62
CDO97493.1	206	jcf7180007780281	184	78.1905	1.635e-15
CDO97494.1	216	jcf7180007784112	185	77.838	2.47e-86
CDO97495.1	553	jcf7180007764811	480	39.375	6.7e-55
CDO97496.1	377	jcf7180007723615	399	81.1725	0
CDO97497.1	389	jcf7180007764454	318	56.207	5.16667e-18
CDO97499.1	411	jcf7180007764454	196	62.6517	6.33333e-17
CDO97500.1	527	jcf7180007779053	509	65.226	0
CDO97502.1	425	jcf7180007784691	236	89.831	8.33e-136
CDO97503.1	391	jcf7180007796435	389	73.522	0
CDO97504.1	336	jcf7180007782698	313	57.827	8.6e-59
CDO97505.1	123	jcf7180007747733	82	76.829	2.91e-33
CDO97507.1	824	jcf7180007727188	442	57.837	4.03333e-23
CDO97508.1	322	jcf7180007789745	746	39.397	3.80006e-16
CDO97510.1	97	jcf7180007802540	80	82.0635	1.17097e-13
CDO97512.1	389	jcf7180007789789	369	92.4808	1.845e-12
CDO97513.1	105	jcf7180007801106	80	91.25	7.43e-45
CDO97514.1	430	jcf7180007762812	67	92.537	3.69e-35
CDO97515.1	558	jcf7180007805874	245	64.898	1.5e-59
CDO97516.1	599	jcf7180007779326	355	68.0315	3.05e-65
CDO97518.1	294	jcf7180007724301	257	37.354	8.5e-42
CDO97519.1	586	jcf7180007779346	445	70.8275	1.01e-26
CDO97520.1	344	jcf7180007779346	464	79.469	4.71244e-14
CDO97521.1	362	jcf7180007778991	321	70.405	2.27e-143
CDO97522.1	2165	jcf7180007709044	644	56.2028	2.80056e-16
CDO97523.1	229	jcf7180007780117	282	70.466	6.80001e-16
CDO97524.1	63	jcf7180007746241	35	85.714	3.3e-13
CDO97525.1	241	jcf7180007780117	134	61.94	7.87e-41
CDO97526.1	514	jcf7180007780797	314	85.987	0
CDO97527.1	558	jcf7180007734872	443	82.619	0
CDO97528.1	517	jcf7180007807296	74	72.973	1.43e-29
CDO97529.1	123	jcf7180007791395	134	61.004	2.94001e-16
CDO97530.1	68	jcf7180007805293	73	53.425	7.78e-14
CDO97531.1	254	jcf7180007725985	54	66.667	7.96e-16
CDO97532.1	434	jcf7180007713056	190	67.029	5.2e-18
CDO97533.1	51	jcf7180007790872	51	66.667	2.47e-11
CDO97534.1	255	jcf7180007725985	153	75.5553	2.46333e-11
CDO97535.1	843	jcf7180007801269	474	72.0324	2.04001e-12
CDO97536.1	269	jcf7180007787075	282	61.348	1.93e-107
CDO97537.1	268	jcf7180007716572	266	80.451	4.57e-117
CDO97538.1	527	jcf7180007759564	370	77.9578	4.025e-14
CDO97539.1	300	jcf7180007825250	302	60.596	7.95e-110
CDO97540.1	340	jcf7180007727538	264	54.9743	2.13667e-13
CDO97541.1	495	jcf7180007792052	62	69.355	1.97e-17
CDO97542.1	419	jcf7180007711064	449	81.2215	2.785e-11
CDO97543.1	216	jcf7180007780412	134	56.716	3.83e-37
CDO97545.1	369	jcf7180007836161	181	89.1597	3.76667e-20
CDO97548.1	772	jcf7180007783434	574	79.384	6.5e-24
CDO97549.1	669	jcf7180007802666	122	74.59	2.36e-47
CDO97550.1	458	jcf7180007790690	413	53.269	1e-155
CDO97551.1	303	jcf7180007814359	302	85.43	5.47e-176
CDO97552.1	303	jcf7180007814359	302	85.762	9.39e-178
CDO97553.1	362	jcf7180007823708	368	43.4653	3.05e-13
CDO97554.1	452	jcf7180007820457	132	60.8973	1.07e-20
CDO97555.1	585	jcf7180007779542	585	76.752	0
CDO97557.1	289	jcf7180007832515	95	90.4925	2.17e-40
CDO97558.1	1051	jcf7180007790008	808	82.1892	9.9914e-44
CDO97559.1	440	jcf7180007793319	201	78.5138	1.385e-21
CDO97560.1	371	jcf7180007724156	342	60.373	1.01e-81
CDO97561.1	650	jcf7180007778872	617	57.05	0
CDO97562.1	559	jcf7180007778872	616	57.63	0
CDO97563.1	645	jcf7180007778872	651	71.429	0
CDO97564.1	443	jcf7180007791314	246	65.6457	3.60667e-17
CDO97565.1	551	jcf7180007747361	259	76.664	1.10667e-22
CDO97566.1	1096	jcf7180007714524	360	75.2425	7.26667e-17
CDO97567.1	848	jcf7180007783042	354	58.7805	3.41e-94
CDO97568.1	318	jcf7180007752644	209	58.373	1.99e-75
CDO97569.1	565	jcf7180007801011	332	75.904	8.89e-166
CDO97570.1	1177	jcf7180007716662	453	76.254	1.34e-70
CDO97571.1	213	jcf7180007733454	42	78.571	2.84e-17
CDO97573.1	1236	jcf7180007791734	482	73.9812	6.14e-20
CDO97574.1	546	jcf7180007759449	97	77.32	4.88e-44
CDO97575.1	358	jcf7180007717066	313	40.256	5.11e-63
CDO97576.1	587	jcf7180007779315	560	82.9094	1.07695e-26
CDO97577.1	147	jcf7180007782211	148	67.568	4.6e-38
CDO97578.1	562	jcf7180007790966	201	67.972	3.785e-13
CDO97579.1	439	jcf7180007738080	235	74.3723	3.86733e-17
CDO97580.1	625	jcf7180007781393	531	81.9423	3.10667e-21
CDO97581.1	445	jcf7180007711027	601	76.2055	1.43e-97
CDO97582.1	379	jcf7180007751285	196	86.615	4.665e-19
CDO97584.1	247	jcf7180007835824	233	72.7553	3.08667e-15
CDO97585.1	433	jcf7180007801333	431	63.535	1.43e-42
CDO97586.1	338	jcf7180007708527	255	60.2565	5.95e-15
CDO97588.1	160	jcf7180007717515	61	80.328	6.33e-25
CDO97590.1	368	jcf7180007802090	299	82.6763	1.34e-12
CDO97591.1	368	jcf7180007820979	324	44.444	6.4e-80
CDO97592.1	538	jcf7180007796965	364	67.582	1.22e-115
CDO97593.1	335	jcf7180007820484	79	60.4075	7.5e-18
CDO97594.1	332	jcf7180007729304	88	63.636	1.53e-25
CDO97595.1	387	jcf7180007710365	307	78.2376	3.44e-12
CDO97596.1	247	jcf7180007720553	153	93.734	3.63e-25
CDO97598.1	1463	jcf7180007786268	454	48.6285	2.1275e-13
CDO97599.1	192	jcf7180007780421	222	71.628	2.445e-14
CDO97600.1	457	jcf7180007834738	130	84.374	2.24355e-12
CDO97601.1	432	jcf7180007780198	382	74.084	0
CDO97602.1	232	jcf7180007728024	44	61.364	4.63e-11
CDO97603.1	956	jcf7180007711648	579	89.1063	1.47433e-28
CDO97605.1	132	jcf7180007805368	149	41.611	1.97e-28
CDO97606.1	415	jcf7180007779457	310	65.2513	1.06365e-19
CDO97607.1	498	jcf7180007763221	415	92.305	1.9625e-14
CDO97608.1	221	jcf7180007763221	219	72.603	2.57e-88
CDO97609.1	475	jcf7180007820602	392	30.6065	6.15256e-17
CDO97610.1	223	jcf7180007726810	133	79.699	4.58e-61
CDO97612.1	592	jcf7180007788279	699	59.2974	2.16e-14
CDO97613.1	378	jcf7180007788279	212	81.1314	6.04172e-16
CDO97614.1	374	jcf7180007796325	350	44.286	8.51e-71
CDO97615.1	569	jcf7180007796325	415	62.429	5.53333e-17
CDO97616.1	1001	jcf7180007716586	975	62.5795	1.475e-38
CDO97617.1	389	jcf7180007789789	372	88.925	3.375e-14
CDO97618.1	141	jcf7180007800281	146	74.318	9.81e-48
CDO97619.1	598	jcf7180007805638	225	87.111	1e-136
CDO97620.1	530	jcf7180007779552	584	73.5926	1.966e-23
CDO97621.1	361	jcf7180007779589	298	44.966	6.19e-60
CDO97622.1	559	jcf7180007788612	533	48.218	3.2e-142
CDO97623.1	521	jcf7180007786537	481	81.606	1.26333e-67
CDO97625.1	257	jcf7180007780226	176	83.1448	2.9e-14
CDO97626.1	240	jcf7180007744371	183	93.8275	6.275e-13
CDO97627.1	600	jcf7180007718277	269	85.8915	2.575e-14
CDO97628.1	517	jcf7180007722423	115	66.087	2.13e-35
CDO97629.1	291	jcf7180007709376	123	49.593	3.11e-27
CDO97631.1	214	jcf7180007716869	159	92.453	2.2e-94
CDO97632.1	202	jcf7180007716869	246	79.3903	1.51667e-11
CDO97633.1	287	jcf7180007820095	300	77	1.03e-160
CDO97634.1	725	jcf7180007737678	371	69.4033	6.76667e-29
CDO97635.1	398	jcf7180007710030	398	77.136	6.37e-173
CDO97636.1	113	jcf7180007717695	45	91.111	9.97e-21
CDO97637.1	948	jcf7180007790319	643	71.2525	2.3737e-18
CDO97638.1	350	jcf7180007725524	266	40.977	1.68e-58
CDO97639.1	644	jcf7180007824259	220	40.455	1.74e-42
CDO97640.1	466	jcf7180007790079	194	39.175	1.89e-20
CDO97641.1	307	jcf7180007779373	123	52.846	1.24e-31
CDO97642.1	127	jcf7180007792216	74	73.5405	3.46e-12
CDO97643.1	843	jcf7180007835034	901	56.937	0
CDO97644.1	400	jcf7180007733554	213	79.343	1.27e-110
CDO97645.1	816	jcf7180007711056	368	79.076	7.87e-170
CDO97646.1	468	jcf7180007799527	153	55.556	9.85e-49
CDO97647.1	1496	jcf7180007727715	969	43.639	7.55e-96
CDO97648.1	170	jcf7180007818477	102	60.784	3.01e-30
CDO97649.1	111	jcf7180007740693	91	75.824	9.8e-22
CDO97650.1	597	jcf7180007782853	207	35.266	3.7e-26
CDO97651.1	997	jcf7180007713437	291	61.168	2.61e-118
CDO97653.1	433	jcf7180007792798	217	75.488	8.09e-82
CDO97654.1	221	jcf7180007736499	203	46.798	9.69e-50
CDO97655.1	728	jcf7180007791261	316	72.9164	4.44001e-12
CDO97656.1	609	jcf7180007813856	296	73.649	6.88e-148
CDO97657.1	301	jcf7180007737589	95	61.053	2.13e-27
CDO97658.1	1253	jcf7180007796626	738	82.8741	3.90909e-21
CDO97659.1	319	jcf7180007815582	74	58.1845	8.75e-12
CDO97660.1	406	jcf7180007737432	289	66.8615	1.025e-38
CDO97661.1	456	jcf7180007837074	744	31.3437	8.73334e-22
CDO97662.1	1082	jcf7180007808279	214	68.692	1.18e-85
CDO97663.1	193	jcf7180007793086	159	76.73	2.96e-77
CDO97664.1	1076	jcf7180007790457	181	54.2415	1.59e-40
CDO97665.1	856	jcf7180007717710	539	57.5368	9.14e-13
CDO97666.1	299	jcf7180007780193	274	81.022	4.53e-144
CDO97668.1	509	jcf7180007780053	213	72.1303	5.55213e-27
CDO97669.1	335	jcf7180007793266	257	60.311	3.91e-67
CDO97670.1	345	jcf7180007780963	359	45.958	2.81333e-12
CDO97672.1	1318	jcf7180007799683	807	83.89	1.735e-24
CDO97674.1	759	jcf7180007752066	1243	55.7127	2.31333e-43
CDO97675.1	252	jcf7180007782390	239	78.6075	2.185e-28
CDO97676.1	681	jcf7180007768347	167	77.933	3.27e-65
CDO97677.1	368	jcf7180007757299	441	75.6227	1.24667e-32
CDO97678.1	307	jcf7180007740624	57	87.719	3.78e-26
CDO97679.1	340	jcf7180007778599	345	79.8957	5.33333e-19
CDO97680.1	238	jcf7180007778599	138	65.217	1.2e-45
CDO97681.1	436	jcf7180007788185	453	73.731	0
CDO97682.1	953	jcf7180007787296	1006	45.4901	4.44444e-27
CDO97683.1	946	jcf7180007803488	427	75.9443	1.7675e-12
CDO97684.1	675	jcf7180007834607	735	57.847	0
CDO97685.1	685	jcf7180007783718	235	71.936	2.5e-68
CDO97686.1	442	jcf7180007753956	71	84.507	1.87e-32
CDO97687.1	333	jcf7180007812527	392	52.806	1.71e-112
CDO97688.1	300	jcf7180007713748	139	86.2355	2.13e-16
CDO97689.1	250	jcf7180007794301	113	45.133	7.26e-19
CDO97690.1	248	jcf7180007723841	99	51.515	4.15e-19
CDO97691.1	550	jcf7180007758365	351	63.818	3.27e-160
CDO97692.1	220	jcf7180007781811	194	65.979	6.16e-65
CDO97693.1	217	jcf7180007796949	196	59.184	2.12e-65
CDO97694.1	619	jcf7180007716693	793	49.118	5.05e-17
CDO97695.1	679	jcf7180007751476	692	78.715	2.875e-46
CDO97698.1	389	jcf7180007820280	134	80.608	2.29e-56
CDO97699.1	437	jcf7180007808876	435	93.333	0
CDO97700.1	466	jcf7180007714922	134	87.3085	2.52e-54
CDO97701.1	753	jcf7180007789402	755	77.483	0
CDO97702.1	745	jcf7180007771415	743	82.7472	1.285e-12
CDO97703.1	347	jcf7180007813359	237	64.699	9.09e-59
CDO97704.1	517	jcf7180007778867	521	61.036	0
CDO97705.1	478	jcf7180007729889	192	42.188	4.16e-41
CDO97706.1	587	jcf7180007721887	570	72.744	0
CDO97707.1	338	jcf7180007721887	124	94.4615	5.35e-15
CDO97708.1	645	jcf7180007815386	472	79.025	0
CDO97709.1	265	jcf7180007756342	138	78.261	7.69e-65
CDO97711.1	399	jcf7180007719306	399	87.218	0
CDO97712.1	208	jcf7180007719306	237	61.8485	1.85e-13
CDO97713.1	1263	jcf7180007786524	694	68.8532	2.90001e-24
CDO97714.1	405	jcf7180007752691	104	93.9525	1.44635e-16
CDO97715.1	520	jcf7180007717278	263	62.357	2.13e-109
CDO97716.1	514	jcf7180007723998	226	81.858	4.83e-131
CDO97717.1	259	jcf7180007723998	229	88.21	3.79e-150
CDO97718.1	337	jcf7180007813156	242	69.008	2.67e-106
CDO97719.1	178	jcf7180007724215	175	70.857	4.49e-83
CDO97720.1	160	jcf7180007804513	193	52.332	5.99e-35
CDO97721.1	358	jcf7180007790497	61	82.207	5.4e-17
CDO97722.1	237	jcf7180007727960	66	84.848	1.66e-33
CDO97723.1	428	jcf7180007748419	273	72.045	5.76667e-18
CDO97724.1	1001	jcf7180007808567	796	84.63	4.24857e-26
CDO97725.1	110	jcf7180007823745	58	86.207	2.98e-26
CDO97726.1	406	jcf7180007823745	74	93.243	1.67e-36
CDO97727.1	2398	jcf7180007765472	2455	70.2169	5.43867e-13
CDO97728.1	231	jcf7180007787573	86	74.419	4.49e-37
CDO97730.1	749	jcf7180007724719	286	37.063	1.35e-49
CDO97731.1	843	jcf7180007790660	607	77.779	8.2e-26
CDO97732.1	672	jcf7180007713274	503	68.318	2.43667e-27
CDO97733.1	343	jcf7180007713090	303	61.716	1.62e-76
CDO97734.1	471	jcf7180007787325	553	86.0182	1.11167e-11
CDO97735.1	623	jcf7180007793333	341	71.56	1.34415e-34
CDO97736.1	157	jcf7180007787741	90	75.556	4.52e-31
CDO97737.1	433	jcf7180007807970	79	75.949	1.79e-34
CDO97739.1	576	jcf7180007780661	348	83.0285	2.8205e-12
CDO97740.1	257	jcf7180007753111	201	87.5455	2.39375e-12
CDO97742.1	88	jcf7180007791585	87	77.011	4.35e-42
CDO97744.1	486	jcf7180007780616	488	93.6868	3.15002e-25
CDO97745.1	432	jcf7180007721116	234	87.1125	3.92628e-16
CDO97746.1	196	jcf7180007708541	122	58.197	1.1e-34
CDO97747.1	450	jcf7180007814000	178	49.438	2.84e-38
CDO97748.1	243	jcf7180007815488	149	64.43	7.59e-35
CDO97749.1	250	jcf7180007751686	109	55.046	1.91e-27
CDO97750.1	584	jcf7180007779381	210	45.238	8.12e-42
CDO97751.1	507	jcf7180007799332	356	79.789	3.91458e-18
CDO97752.1	1134	jcf7180007835968	1043	51.582	0
CDO97753.1	420	jcf7180007832594	569	66.1354	2.04e-16
CDO97754.1	600	jcf7180007747609	322	50.214	7.77e-63
CDO97755.1	674	jcf7180007775436	677	49.778	0
CDO97756.1	328	jcf7180007819992	131	77.7265	1.77e-19
CDO97757.1	339	jcf7180007787828	118	73.7715	1.86e-14
CDO97758.1	275	jcf7180007749771	123	96.1257	2.77e-55
CDO97759.1	775	jcf7180007708361	581	82.5807	4.1e-12
CDO97760.1	566	jcf7180007781494	526	66.92	0
CDO97761.1	971	jcf7180007709149	893	66.199	1.8825e-49
CDO97762.1	1106	jcf7180007831932	2228	61.8032	1.0725e-23
CDO97763.1	193	jcf7180007797121	192	73.438	1.56e-88
CDO97764.1	328	jcf7180007741663	219	67.6933	4.86667e-22
CDO97765.1	88	jcf7180007780786	88	95.455	2.78e-51
CDO97766.1	432	jcf7180007802694	388	87.7013	5.96667e-12
CDO97767.1	548	jcf7180007779529	510	76.471	0
CDO97768.1	324	jcf7180007833974	326	83.775	2.75e-22
CDO97769.1	376	jcf7180007724301	308	79.545	2.02e-170
CDO97770.1	432	jcf7180007788234	180	62.778	7.91e-58
CDO97771.1	1111	jcf7180007724719	1109	76.826	0
CDO97772.1	536	jcf7180007787372	244	61.3633	1.92e-13
CDO97773.1	583	jcf7180007724194	484	85.6376	1.03529e-15
CDO97774.1	169	jcf7180007712165	159	56.604	2.72e-38
CDO97775.1	867	jcf7180007788688	897	67.3389	1.85e-24
CDO97776.1	561	jcf7180007752095	364	73.4895	4.54e-32
CDO97777.1	712	jcf7180007760287	204	82.9215	2.2475e-16
CDO97778.1	430	jcf7180007760287	424	81.1915	8.60026e-25
CDO97779.1	281	jcf7180007747197	78	52.564	1.73e-14
CDO97781.1	479	jcf7180007718019	485	81.158	4.33333e-25
CDO97782.1	616	jcf7180007743260	345	71.8388	4.20018e-28
CDO97783.1	310	jcf7180007825306	294	70.408	1.19e-90
CDO97784.1	165	jcf7180007825306	142	54.225	1.92e-21
CDO97785.1	237	jcf7180007711416	100	55	2.21e-23
CDO97786.1	704	jcf7180007794561	272	68.8402	4.80033e-21
CDO97787.1	260	jcf7180007782032	230	85.217	4.53e-137
CDO97788.1	632	jcf7180007794097	588	71.1475	2.365e-119
CDO97789.1	567	jcf7180007794097	584	64.0725	3.82e-111
CDO97790.1	300	jcf7180007794050	104	83.804	2.2734e-14
CDO97791.1	374	jcf7180007790955	333	42.042	1.67e-52
CDO97792.1	487	jcf7180007794050	326	89.5181	8.38633e-16
CDO97793.1	237	jcf7180007716504	240	42.083	3.11e-53
CDO97794.1	505	jcf7180007767129	462	77.6358	3.2e-25
CDO97795.1	122	jcf7180007790684	100	62.4175	2.26e-16
CDO97796.1	1840	jcf7180007790684	731	83.9703	1.51333e-44
CDO97797.1	394	jcf7180007791222	147	82.993	1.47e-59
CDO97798.1	96	jcf7180007800169	74	58.108	1.4e-20
CDO97800.1	772	jcf7180007788684	699	81.1466	2.07349e-36
CDO97801.1	319	jcf7180007750109	91	47.253	1.67e-23
CDO97802.1	792	jcf7180007787213	767	84.615	0
CDO97803.1	404	jcf7180007803643	118	61.017	1.98e-35
CDO97804.1	391	jcf7180007717833	247	46.559	1.66e-65
CDO97805.1	731	jcf7180007738782	868	70.2277	1.92667e-133
CDO97806.1	389	jcf7180007717833	250	46.8	4.46e-60
CDO97807.1	831	jcf7180007838296	262	63.678	6.05e-34
CDO97808.1	1022	jcf7180007780819	280	71.8485	2.645e-15
CDO97809.1	159	jcf7180007761293	164	71.1	6.75e-18
CDO97810.1	228	jcf7180007759605	138	82.434	1.71967e-12
CDO97811.1	214	jcf7180007808145	68	47.059	5.39e-12
CDO97813.1	395	jcf7180007794444	370	74.595	8.6e-139
CDO97814.1	1372	jcf7180007745243	1186	56.329	0
CDO97815.1	1525	jcf7180007800767	2531	65.7521	5.71538e-28
CDO97816.1	521	jcf7180007769306	496	65.6273	1.19e-14
CDO97817.1	471	jcf7180007742518	306	64.2517	3.7e-14
CDO97818.1	218	jcf7180007779994	203	78.1585	3.585e-30
CDO97819.1	570	jcf7180007716628	336	52.512	3.77e-18
CDO97820.1	584	jcf7180007787522	539	58.937	9.7e-15
CDO97821.1	364	jcf7180007736222	344	70.487	5.6875e-12
CDO97822.1	1118	jcf7180007736222	1065	63.7865	1.02302e-43
CDO97823.1	900	jcf7180007723906	206	70.876	4.065e-26
CDO97824.1	235	jcf7180007764770	87	59.77	2.39e-19
CDO97825.1	402	jcf7180007789889	152	77.6377	1.02667e-13
CDO97828.1	544	jcf7180007713238	496	60.7795	2.5395e-82
CDO97829.1	629	jcf7180007783833	483	91.304	0
CDO97830.1	511	jcf7180007758734	356	84.797	3.61e-13
CDO97831.1	128	jcf7180007736719	84	75.837	7.51e-25
CDO97832.1	283	jcf7180007745320	146	62.329	9.24e-43
CDO97834.1	736	jcf7180007709895	560	58.699	1.212e-12
CDO97835.1	56	jcf7180007721640	33	100	1.34e-14
CDO97836.1	658	jcf7180007794321	625	85.2516	1.03025e-18
CDO97837.1	578	jcf7180007817040	334	63.473	4.48e-135
CDO97839.1	560	jcf7180007726343	457	54.923	8.04e-167
CDO97840.1	509	jcf7180007783833	447	44.743	6.78e-114
CDO97841.1	954	jcf7180007755941	952	56.918	1.31e-102
CDO97842.1	270	jcf7180007789437	271	82.412	1.34e-23
CDO97843.1	489	jcf7180007750318	530	76.7335	4.3e-39
CDO97845.1	990	jcf7180007820077	641	75.9322	0
CDO97846.1	737	jcf7180007789550	804	75.203	1.0375e-37
CDO97847.1	180	jcf7180007723944	185	79.123	3.715e-28
CDO97848.1	95	jcf7180007730395	95	63.158	8.66e-26
CDO97850.1	356	jcf7180007763311	374	49.685	1.34e-15
CDO97851.1	396	jcf7180007719513	306	64.8447	1.20667e-37
CDO97852.1	544	jcf7180007719513	555	76.036	0
CDO97853.1	125	jcf7180007814236	110	57.4355	8.56e-25
CDO97854.1	611	jcf7180007717579	329	45.897	4.15e-60
CDO97855.1	209	jcf7180007710609	255	59.1505	2.5e-60
CDO97856.1	238	jcf7180007837578	234	41.453	1.81e-33
CDO97857.1	277	jcf7180007793793	160	55	8.78e-49
CDO97858.1	114	jcf7180007784030	74	50	2.98e-17
CDO97859.1	264	jcf7180007711195	95	63.9795	5.9e-29
CDO97860.1	234	jcf7180007783922	278	86.092	6.40009e-24
CDO97861.1	201	jcf7180007757902	204	87.5637	9.99448e-13
CDO97863.1	417	jcf7180007805949	455	71.209	4.77e-141
CDO97864.1	849	jcf7180007791812	645	70.6644	2.88e-14
CDO97865.1	380	jcf7180007713945	207	64.251	4.2e-69
CDO97866.1	679	jcf7180007718539	627	62.8288	1.70715e-21
CDO97867.1	357	jcf7180007784517	178	64.8855	2.63e-18
CDO97868.1	244	jcf7180007832877	167	86.2125	5.95061e-28
CDO97869.1	349	jcf7180007732803	353	80.17	4.6e-173
CDO97871.1	5476	jcf7180007740007	2380	60.0708	1.635e-15
CDO97872.1	531	jcf7180007791523	461	94.36	0
CDO97873.1	104	jcf7180007780747	102	58.824	3.4e-35
CDO97874.1	901	jcf7180007708778	843	52.2117	7.31818e-16
CDO97875.1	185	jcf7180007791523	102	50.98	3.99e-21
CDO97877.1	582	jcf7180007781507	611	55.483	2.47e-113
CDO97878.1	102	jcf7180007719392	107	50.467	2.45e-26
CDO97880.1	316	jcf7180007823069	107	61.682	5.13e-36
CDO97881.1	528	jcf7180007824301	610	70.3727	5.175e-16
CDO97882.1	839	jcf7180007722658	441	55.4755	1.51e-119
CDO97883.1	310	jcf7180007786208	80	58.547	8.75e-15
CDO97884.1	195	jcf7180007788994	195	81.538	2.97e-93
CDO97885.1	620	jcf7180007778918	352	65.5482	5.625e-20
CDO97886.1	274	jcf7180007801027	50	86	1.99e-21
CDO97887.1	414	jcf7180007779164	370	88.852	8.45e-57
CDO97888.1	131	jcf7180007717416	135	67.407	5.21e-23
CDO97889.1	467	jcf7180007780887	402	56.898	7.86667e-13
CDO97890.1	1230	jcf7180007769303	957	80.6143	3.57783e-12
CDO97891.1	184	jcf7180007808404	66	68.182	5.79e-23
CDO97892.1	122	jcf7180007798598	55	90.909	7.87e-28
CDO97893.1	88	jcf7180007754313	70	84.286	3.69e-26
CDO97894.1	330	jcf7180007791426	227	44.934	1.32e-49
CDO97895.1	436	jcf7180007801554	390	50	7.58e-85
CDO97896.1	363	jcf7180007739110	163	69.6675	1.86e-16
CDO97897.1	146	jcf7180007797355	34	88.235	5.88e-13
CDO97899.1	407	jcf7180007805468	269	65.1153	4.4e-14
CDO97900.1	344	jcf7180007712954	315	30.476	2.68e-39
CDO97901.1	429	jcf7180007712317	313	72.3017	2.0725e-17
CDO97902.1	309	jcf7180007712317	274	58.67	2.785e-20
CDO97903.1	377	jcf7180007759610	189	84.0675	3.46e-54
CDO97904.1	576	jcf7180007791433	629	67.797	1.38e-22
CDO97905.1	357	jcf7180007797588	121	66.415	5.6e-27
CDO97906.1	528	jcf7180007716617	203	67.488	1.83e-85
CDO97907.1	726	jcf7180007798537	487	67.0714	3.37714e-14
CDO97909.1	574	jcf7180007819832	200	74.7665	1.55e-60
CDO97911.1	258	jcf7180007745838	226	68.142	4.24e-72
CDO97912.1	842	jcf7180007778560	562	70.3912	1.7625e-42
CDO97913.1	597	jcf7180007779529	515	43.495	1.48e-127
CDO97914.1	816	jcf7180007726546	313	77.5544	8.16208e-14
CDO97915.1	639	jcf7180007711260	738	51.7987	8.73333e-25
CDO97916.1	478	jcf7180007718271	135	84.8433	9.53333e-19
CDO97917.1	337	jcf7180007817061	281	69.2037	4.29e-21
CDO97918.1	835	jcf7180007713124	892	78.0009	3.77085e-12
CDO97919.1	500	jcf7180007823631	426	46.714	5.04e-110
CDO97920.1	175	jcf7180007784002	45	80	4.75e-14
CDO97921.1	485	jcf7180007794467	258	72.2735	3.76e-18
CDO97922.1	226	jcf7180007837434	301	65.3932	2.028e-18
CDO97923.1	279	jcf7180007789153	229	80.2215	2.68e-19
CDO97924.1	202	jcf7180007785814	122	75.437	4.71165e-24
CDO97925.1	757	jcf7180007787774	748	74.527	1.73667e-60
CDO97926.1	186	jcf7180007747272	100	80	1.99e-43
CDO97927.1	293	jcf7180007821340	48	85.417	4.96e-20
CDO97928.1	730	jcf7180007753880	282	75.177	4.59e-118
CDO97929.1	1493	jcf7180007788652	1466	78.3757	0
CDO97930.1	292	jcf7180007736179	164	87.195	3.16e-100
CDO97931.1	275	jcf7180007804391	208	75.481	2.58e-104
CDO97932.1	530	jcf7180007719655	87	95.402	8.3e-38
CDO97933.1	206	jcf7180007805260	222	76.4525	9.22e-70
CDO97934.1	240	jcf7180007782887	246	65.041	4.55e-66
CDO97935.1	353	jcf7180007836357	283	48.763	2.56e-83
CDO97936.1	480	jcf7180007708655	130	78.064	1.53e-14
CDO97937.1	1252	jcf7180007729764	668	50.299	5.45e-163
CDO97938.1	129	jcf7180007712206	114	79.0685	2.07e-14
CDO97940.1	620	jcf7180007826422	174	86.207	1.18e-88
CDO97941.1	203	jcf7180007720080	204	93.137	9.17e-115
CDO97942.1	664	jcf7180007779214	151	74.0303	2.48667e-11
CDO97943.1	159	jcf7180007779214	81	46.914	7.33e-13
CDO97944.1	143	jcf7180007729453	153	88.8993	2.70675e-17
CDO97945.1	739	jcf7180007716592	373	70.241	6.75e-157
CDO97946.1	244	jcf7180007798411	45	84.444	2.82e-17
CDO97947.1	276	jcf7180007779429	215	66.512	3.09e-95
CDO97948.1	394	jcf7180007790799	416	49.9558	3.015e-26
CDO97949.1	389	jcf7180007823688	248	73.387	1.57e-123
CDO97950.1	585	jcf7180007796807	221	64.924	3.165e-25
CDO97951.1	758	jcf7180007827262	742	38.539	7.65e-37
CDO97952.1	108	jcf7180007719889	60	65	1.26e-18
CDO97953.1	423	jcf7180007781497	411	59.367	3.62e-108
CDO97954.1	308	jcf7180007793265	314	83.439	5.99e-172
CDO97955.1	305	jcf7180007813402	419	59.5894	9.82e-16
CDO97957.1	359	jcf7180007806291	411	69.759	1.09141e-68
CDO97958.1	363	jcf7180007734724	215	61.9545	1.39e-60
CDO97960.1	474	jcf7180007791101	636	34.171	6.6e-19
CDO97961.1	639	jcf7180007736326	293	60.751	9.42e-57
CDO97962.1	611	jcf7180007767744	262	46.565	2.45e-44
CDO97963.1	278	jcf7180007791505	237	71.0783	7.93823e-17
CDO97967.1	402	jcf7180007814757	288	71.875	3.96e-124
CDO97968.1	767	jcf7180007784713	729	76.8377	8.19875e-13
CDO97969.1	495	jcf7180007732201	346	78.8058	2.6e-30
CDO97970.1	361	jcf7180007824872	198	48.99	4.37e-29
CDO97971.1	509	jcf7180007711228	404	79.2373	1.29143e-13
CDO97972.1	330	jcf7180007799044	213	88.627	2.645e-49
CDO97973.1	488	jcf7180007714207	425	56.7045	1.37e-84
CDO97974.1	1155	jcf7180007779153	793	60.347	1.2262e-15
CDO97975.1	706	jcf7180007738258	343	73.0248	6.17169e-12
CDO97976.1	150	jcf7180007793355	70	73.6745	4.22e-20
CDO97977.1	370	jcf7180007709999	374	79.109	6.50003e-27
CDO97978.1	651	jcf7180007838594	445	72.9427	4.83333e-14
CDO97979.1	1499	jcf7180007715605	1457	78.7286	6.5e-14
CDO97980.1	99	jcf7180007788874	44	72.727	6.99e-14
CDO97981.1	1461	jcf7180007739302	1679	57.5399	4.42e-12
CDO97982.1	375	jcf7180007813106	367	58.9343	9.06e-117
CDO97983.1	268	jcf7180007837574	200	63.661	9.5334e-19
CDO97984.1	605	jcf7180007832702	535	70.5344	1.07e-155
CDO97985.1	212	jcf7180007781696	189	76.19	8.49e-96
CDO97986.1	286	jcf7180007789826	144	73.611	1.38e-64
CDO97987.1	374	jcf7180007805993	265	70.943	6.57e-90
CDO97989.1	336	jcf7180007737921	353	78.835	3.56667e-17
CDO97990.1	211	jcf7180007767180	71	74.648	1.33e-29
CDO97991.1	498	jcf7180007797398	333	46.246	2.5e-75
CDO97992.1	194	jcf7180007724451	169	56.909	1.22e-45
CDO97993.1	302	jcf7180007807746	259	50.3777	5.12e-14
CDO97994.1	577	jcf7180007708999	615	81.8888	4.67778e-12
CDO97995.1	251	jcf7180007743064	208	66.827	1.68e-59
CDO97996.1	353	jcf7180007734915	46	65.217	7.68e-13
CDO97997.1	171	jcf7180007785480	103	46.602	4.35e-20
CDO97998.1	708	jcf7180007778887	855	59.2297	1.12857e-14
CDO97999.1	1005	jcf7180007757028	767	63.0726	3.32e-14
CDO98001.1	143	jcf7180007750218	41	73.171	8.14e-13
CDO98003.1	248	jcf7180007805101	270	57.778	2.35e-76
CDO98004.1	444	jcf7180007813442	444	80.631	0
CDO98005.1	537	jcf7180007816806	184	54.7345	1.375e-15
CDO98006.1	427	jcf7180007787547	444	76.4835	4.065e-73
CDO98007.1	437	jcf7180007784161	444	85.1128	1.6175e-18
CDO98008.1	334	jcf7180007729237	390	47.99	6.04e-56
CDO98009.1	233	jcf7180007788642	233	63.948	1.21e-97
CDO98010.1	321	jcf7180007730694	111	72.973	2.24e-31
CDO98011.1	198	jcf7180007809746	203	60.3165	3.88e-14
CDO98012.1	617	jcf7180007814869	578	49.7877	1.11333e-16
CDO98013.1	594	jcf7180007779947	545	59.633	0
CDO98014.1	335	jcf7180007753719	359	74.9204	9.07286e-12
CDO98015.1	303	jcf7180007753719	123	83.844	3.67e-37
CDO98016.1	184	jcf7180007743986	70	87.143	5.46e-39
CDO98017.1	130	jcf7180007812857	97	79.8485	2.47039e-12
CDO98018.1	428	jcf7180007812857	115	58.261	4.22e-28
CDO98019.1	986	jcf7180007788370	404	60.9345	1.34e-34
CDO98020.1	151	jcf7180007724731	60	51.667	4.67e-13
CDO98022.1	765	jcf7180007787781	457	72.2503	3.86667e-58
CDO98023.1	165	jcf7180007714867	157	81.529	1.43e-63
CDO98024.1	144	jcf7180007799467	201	57.711	1.03e-44
CDO98025.1	452	jcf7180007768642	543	50.2307	4.65e-117
CDO98026.1	204	jcf7180007834498	296	63.4635	7.15044e-46
CDO98027.1	313	jcf7180007834498	631	79.1937	1.2825e-61
CDO98028.1	313	jcf7180007834498	631	77.3148	3.525e-58
CDO98029.1	98	jcf7180007834498	92	88.0435	7.59e-33
CDO98030.1	310	jcf7180007784746	325	76.917	1.28e-25
CDO98031.1	423	jcf7180007815470	60	96.667	5.32e-30
CDO98032.1	460	jcf7180007718012	76	78.947	9.96e-31
CDO98033.1	178	jcf7180007711466	158	70.253	2.6e-50
CDO98034.1	206	jcf7180007787609	170	80.9525	7.87e-60
CDO98035.1	554	jcf7180007760687	308	43.182	1.71e-66
CDO98036.1	1134	jcf7180007739123	819	68.879	0
CDO98037.1	119	jcf7180007718973	76	67.105	2.2e-22
CDO98038.1	907	jcf7180007835908	428	70.2676	2.28e-23
CDO98039.1	395	jcf7180007793009	319	35.423	5.6e-57
CDO98040.1	651	jcf7180007709031	647	73.416	0
CDO98041.1	701	jcf7180007709031	670	76.1251	1.204e-22
CDO98042.1	309	jcf7180007811992	309	85.437	0
CDO98043.1	307	jcf7180007811992	311	79.011	1.255e-21
CDO98044.1	238	jcf7180007746174	139	80.576	1.9e-62
CDO98047.1	761	jcf7180007797361	457	57.877	3.28e-127
CDO98048.1	188	jcf7180007802321	184	35.87	3.46e-26
CDO98049.1	303	jcf7180007791505	229	61.3307	3.4461e-14
CDO98051.1	464	jcf7180007723488	319	64.721	6.13333e-24
CDO98052.1	166	jcf7180007723488	166	95.181	2.24e-101
CDO98053.1	344	jcf7180007717151	146	69.412	2.47334e-11
CDO98054.1	189	jcf7180007782300	202	73.3275	1.48e-54
CDO98055.1	223	jcf7180007788443	190	43.158	6.06e-44
CDO98056.1	487	jcf7180007741576	256	95.051	1.32e-46
CDO98057.1	749	jcf7180007779807	262	70.229	2.5e-107
CDO98058.1	199	jcf7180007779807	66	87.879	6.66e-32
CDO98059.1	251	jcf7180007711201	207	52.657	1.3e-49
CDO98061.1	289	jcf7180007767806	86	43.023	5.19e-15
CDO98062.1	1072	jcf7180007711825	226	74.096	1.23667e-19
CDO98063.1	858	jcf7180007812532	872	74.0094	1.692e-16
CDO98064.1	653	jcf7180007717943	892	45.045	3.86667e-16
CDO98065.1	372	jcf7180007789430	231	56.71	2.54e-67
CDO98067.1	707	jcf7180007791949	552	61.957	2.11e-147
CDO98068.1	152	jcf7180007791949	155	89.0905	8.02705e-31
CDO98069.1	663	jcf7180007708819	328	76.078	8.67e-114
CDO98070.1	926	jcf7180007710127	318	87.9523	1.97333e-31
CDO98072.1	427	jcf7180007751163	476	59.454	2.31e-120
CDO98073.1	118	jcf7180007751163	155	45.806	5.48e-28
CDO98074.1	721	jcf7180007797545	376	73.6877	1.10667e-12
CDO98075.1	710	jcf7180007780820	287	66.551	6.28e-115
CDO98076.1	356	jcf7180007761673	359	66.852	3.4e-147
CDO98077.1	649	jcf7180007789195	385	49.0495	1.825e-20
CDO98078.1	370	jcf7180007792143	111	55.856	2.11e-33
CDO98079.1	909	jcf7180007790973	186	75.9565	5.6e-14
CDO98080.1	191	jcf7180007732025	106	58.491	1.29e-32
CDO98081.1	202	jcf7180007779974	229	52.511	7.45e-26
CDO98082.1	160	jcf7180007833152	144	90.278	3.56e-88
CDO98083.1	457	jcf7180007833152	449	67.5808	4.43333e-17
CDO98084.1	486	jcf7180007802008	132	59.1565	7.38e-32
CDO98085.1	394	jcf7180007710026	330	72.271	1.69e-15
CDO98086.1	523	jcf7180007808902	479	86.6516	1.736e-25
CDO98087.1	314	jcf7180007822391	369	40.108	5.79e-89
CDO98088.1	315	jcf7180007822391	371	40.431	7.36e-88
CDO98089.1	314	jcf7180007822391	375	42.667	4.32e-99
CDO98090.1	311	jcf7180007822391	373	46.113	1.65e-111
CDO98091.1	314	jcf7180007822391	375	55.2	9.03e-135
CDO98092.1	1422	jcf7180007780831	1398	72.6594	2.52857e-22
CDO98093.1	1422	jcf7180007780831	1398	72.9009	5.37857e-21
CDO98094.1	480	jcf7180007835142	478	83.682	0
CDO98095.1	813	jcf7180007732503	816	59.9867	0
CDO98096.1	718	jcf7180007835142	1242	54.455	1.605e-58
CDO98097.1	98	jcf7180007835142	91	61.538	5.46e-25
CDO98098.1	421	jcf7180007788323	413	77.825	1.54e-84
CDO98099.1	630	jcf7180007716542	351	86.174	6.75e-40
CDO98100.1	176	jcf7180007714874	157	68.153	3.99e-46
CDO98101.1	326	jcf7180007737017	326	87.576	5.45e-88
CDO98102.1	612	jcf7180007765235	331	82.473	1.035e-41
CDO98103.1	131	jcf7180007793007	100	100	6.98e-59
CDO98104.1	310	jcf7180007836458	249	32.53	2.06e-19
CDO98105.1	348	jcf7180007824100	210	63.233	2.57e-54
CDO98106.1	426	jcf7180007797398	256	42.969	3.16e-65
CDO98107.1	204	jcf7180007727144	128	53.125	3.04e-19
CDO98108.1	368	jcf7180007756940	303	72.2085	6.17e-127
CDO98109.1	332	jcf7180007756940	285	79.2785	1.24e-129
CDO98110.1	536	jcf7180007741141	461	74.7115	7.76667e-22
CDO98111.1	240	jcf7180007794821	331	69.615	3.77555e-12
CDO98112.1	506	jcf7180007798582	543	36.873	9.83e-83
CDO98113.1	538	jcf7180007821223	89	89.888	7.92e-46
CDO98115.1	256	jcf7180007788831	135	76.4285	1.28e-11
CDO98116.1	888	jcf7180007801548	409	83.863	0
CDO98117.1	170	jcf7180007723774	312	45.8377	3.523e-24
CDO98118.1	468	jcf7180007782740	271	47.601	1.54e-65
CDO98119.1	272	jcf7180007725559	102	48.039	7.49e-13
CDO98120.1	89	jcf7180007745345	50	78	2e-18
CDO98121.1	352	jcf7180007712528	56	69.643	4.97e-17
CDO98124.1	608	jcf7180007784797	299	49.773	2.98e-16
CDO98125.1	532	jcf7180007736860	236	63.521	4.23e-26
CDO98126.1	373	jcf7180007785248	373	75.067	0
CDO98127.1	350	jcf7180007780841	223	78.924	1.61e-115
CDO98128.1	693	jcf7180007780841	693	72.872	0
CDO98129.1	211	jcf7180007798151	168	74.5535	4.15e-26
CDO98131.1	123	jcf7180007816636	121	42.975	1.98e-17
CDO98132.1	152	jcf7180007792003	132	65.152	1.41e-30
CDO98133.1	461	jcf7180007710544	432	33.796	2.32e-62
CDO98134.1	285	jcf7180007791335	268	77.8253	2.75356e-42
CDO98135.1	170	jcf7180007727920	52	69.231	3.09e-20
CDO98137.1	436	jcf7180007736275	208	81.25	2.54e-121
CDO98138.1	820	jcf7180007781543	1611	34.5237	2.3925e-17
CDO98139.1	418	jcf7180007780453	425	69.882	0
CDO98140.1	180	jcf7180007745502	38	92.105	3.07e-14
CDO98141.1	180	jcf7180007718432	71	53.521	1.18e-16
CDO98142.1	172	jcf7180007807081	79	88.608	3.36e-45
CDO98143.1	147	jcf7180007779492	42	85.714	1.02e-17
CDO98144.1	212	jcf7180007756445	140	90.708	4.58e-11
CDO98145.1	809	jcf7180007749694	784	85.3985	6.05e-75
CDO98146.1	128	jcf7180007739930	59	74.576	7.96e-19
CDO98147.1	125	jcf7180007837066	119	41.176	7.9e-15
CDO98148.1	236	jcf7180007796718	268	59.328	5.46e-84
CDO98149.1	133	jcf7180007725888	82	68.293	4.79e-30
CDO98151.1	317	jcf7180007816694	271	68.0765	5.28e-64
CDO98152.1	310	jcf7180007792845	307	50.814	2.2e-57
CDO98153.1	398	jcf7180007792845	336	81.25	3.14e-168
CDO98154.1	216	jcf7180007796836	181	44.751	1.08e-41
CDO98155.1	211	jcf7180007791033	211	82.5735	5.75e-34
CDO98156.1	156	jcf7180007785153	46	84.698	1.36e-11
CDO98157.1	259	jcf7180007783323	213	82.8872	1.715e-38
CDO98158.1	291	jcf7180007795162	176	74.4255	1.75008e-13
CDO98159.1	189	jcf7180007782028	201	82.0133	9.93333e-15
CDO98160.1	257	jcf7180007782796	227	67.381	5.82e-78
CDO98161.1	1134	jcf7180007790747	1209	68.6879	1.125e-14
CDO98162.1	374	jcf7180007709239	318	84.591	1.93e-169
CDO98163.1	616	jcf7180007709239	632	67.3843	1.8e-114
CDO98164.1	290	jcf7180007709239	242	51.653	4.35e-57
CDO98165.1	186	jcf7180007717780	105	53.333	1.34e-24
CDO98166.1	271	jcf7180007785739	198	48.99	5.93e-49
CDO98167.1	493	jcf7180007790662	303	63.5357	7.22e-62
CDO98168.1	184	jcf7180007802073	60	75	2.2e-21
CDO98169.1	498	jcf7180007760718	430	81.628	0
CDO98170.1	746	jcf7180007734705	444	67.4368	3.2e-20
CDO98171.1	674	jcf7180007790202	675	66.519	0
CDO98172.1	735	jcf7180007790202	661	65.961	0
CDO98173.1	323	jcf7180007790202	312	85.577	2.4e-176
CDO98174.1	390	jcf7180007709107	48	93.75	9.07e-22
CDO98175.1	452	jcf7180007736096	84	88.095	1.05e-40
CDO98177.1	1717	jcf7180007812748	576	61.632	0
CDO98178.1	522	jcf7180007787718	540	79.989	2.55e-23
CDO98179.1	762	jcf7180007729745	718	95.6935	1.75e-54
CDO98180.1	175	jcf7180007836964	277	45.8265	3.73e-19
CDO98182.1	207	jcf7180007820549	207	76.812	9.69e-96
CDO98183.1	106	jcf7180007831427	94	44.681	3.24e-12
CDO98184.1	361	jcf7180007752297	312	85.259	8e-13
CDO98185.1	578	jcf7180007712229	242	71.5162	7.33725e-20
CDO98186.1	1130	jcf7180007796157	963	77.7753	1.18727e-29
CDO98187.1	486	jcf7180007736551	343	86.88	1.79e-172
CDO98188.1	280	jcf7180007812046	271	78.229	1.28e-138
CDO98190.1	196	jcf7180007754913	167	77.844	1.4e-79
CDO98191.1	214	jcf7180007787005	218	58.257	5.24e-71
CDO98192.1	513	jcf7180007823990	334	75.749	9.41e-157
CDO98193.1	195	jcf7180007731128	197	73.096	8.64e-86
CDO98194.1	554	jcf7180007743485	483	54.6888	9.0866e-12
CDO98195.1	545	jcf7180007708362	540	67.407	0
CDO98196.1	551	jcf7180007708362	549	71.22	0
CDO98197.1	207	jcf7180007708362	234	67.949	1.91e-98
CDO98198.1	338	jcf7180007729495	256	71.1705	7.55e-48
CDO98199.1	468	jcf7180007821052	467	85.653	0
CDO98200.1	457	jcf7180007833633	464	73.7513	7.83333e-32
CDO98201.1	280	jcf7180007834008	228	54.737	1.37006e-13
CDO98202.1	278	jcf7180007734901	133	39.098	7.49e-16
CDO98204.1	440	jcf7180007724719	344	39.244	5.29e-66
CDO98205.1	210	jcf7180007788688	227	48.899	1.42e-47
CDO98206.1	956	jcf7180007712165	1025	72.0742	0
CDO98207.1	182	jcf7180007803898	189	44.974	4.46e-26
CDO98208.1	1020	jcf7180007792756	964	80.1307	5.75e-14
CDO98209.1	231	jcf7180007752471	134	67.104	6.53451e-13
CDO98210.1	183	jcf7180007789874	99	71.717	1.81e-42
CDO98211.1	52	jcf7180007817821	52	82.692	1.16e-23
CDO98213.1	193	jcf7180007722628	188	65.0085	3.25e-20
CDO98214.1	324	jcf7180007758990	91	57.143	5.86e-21
CDO98215.1	302	jcf7180007804246	112	58.929	5.47e-35
CDO98216.1	116	jcf7180007820020	116	65.517	8.6e-44
CDO98217.1	302	jcf7180007711117	226	85.219	1.88e-89
CDO98218.1	303	jcf7180007785836	133	73.684	7.31e-50
CDO98219.1	677	jcf7180007794278	590	73.754	1.12009e-19
CDO98220.1	275	jcf7180007795953	271	80.443	1.09e-160
CDO98223.1	332	jcf7180007785588	292	88.347	1.88861e-22
CDO98224.1	536	jcf7180007741291	373	45.039	2.24e-24
CDO98225.1	448	jcf7180007717066	432	84.198	0
CDO98226.1	368	jcf7180007812548	93	59.14	1.96e-26
CDO98227.1	318	jcf7180007747934	316	71.862	4.14e-36
CDO98228.1	399	jcf7180007795161	189	68.254	3.14e-59
CDO98229.1	465	jcf7180007791601	196	81.122	2.73e-100
CDO98230.1	263	jcf7180007807392	77	70.13	5.64e-31
CDO98231.1	164	jcf7180007807392	86	80.233	1.85e-40
CDO98232.1	414	jcf7180007710649	291	66.323	1.68e-129
CDO98233.1	1451	jcf7180007739955	586	33.106	3.45e-74
CDO98234.1	389	jcf7180007794022	201	79.4898	2.2086e-24
CDO98235.1	647	jcf7180007769336	197	72.081	3.71e-94
CDO98236.1	730	jcf7180007792132	617	74.075	0
CDO98237.1	556	jcf7180007714581	250	74	1.84e-130
CDO98238.1	89	jcf7180007731450	41	80.488	7.71e-17
CDO98239.1	442	jcf7180007790956	431	92.1472	4.68e-24
CDO98241.1	358	jcf7180007710547	316	29.114	9.77e-34
CDO98242.1	434	jcf7180007759000	299	90.97	0
CDO98244.1	656	jcf7180007788612	656	92.683	0
CDO98245.1	905	jcf7180007833115	973	69.7023	1.05667e-38
CDO98247.1	227	jcf7180007801105	164	37.805	1.91e-18
CDO98249.1	208	jcf7180007728110	111	79.279	1.28e-53
CDO98250.1	510	jcf7180007780775	202	67.822	7e-79
CDO98251.1	470	jcf7180007715734	396	44.444	2.03e-95
CDO98252.1	253	jcf7180007717434	69	63.768	2.23e-22
CDO98253.1	213	jcf7180007802901	48	93.386	2.27e-14
CDO98255.1	242	jcf7180007718236	91	80.7845	2.37e-29
CDO98256.1	489	jcf7180007718236	177	81.356	3.57e-86
CDO98257.1	104	jcf7180007786035	104	73.077	2.78e-38
CDO98258.1	413	jcf7180007802909	146	91.796	4.8e-12
CDO98259.1	340	jcf7180007711463	284	54.93	2.91e-89
CDO98260.1	370	jcf7180007825459	196	48.469	1.18e-35
CDO98261.1	541	jcf7180007785915	382	43.717	2.35e-90
CDO98263.1	675	jcf7180007742035	273	41.026	3.89e-45
CDO98264.1	304	jcf7180007790100	279	80.8183	3.96667e-46
CDO98265.1	532	jcf7180007817364	508	75.591	0
CDO98266.1	423	jcf7180007787516	423	76.832	0
CDO98267.1	95	jcf7180007756347	67	83.582	5.28e-26
CDO98268.1	449	jcf7180007780110	333	43.243	1.67e-76
CDO98269.1	302	jcf7180007717838	520	48.2667	3.22333e-34
CDO98270.1	672	jcf7180007815439	333	82.282	0
CDO98271.1	289	jcf7180007736178	150	72.7203	5.96667e-11
CDO98272.1	71	jcf7180007780132	36	88.889	7.88e-15
CDO98273.1	681	jcf7180007790857	275	58.545	6.17e-80
CDO98274.1	288	jcf7180007713192	166	60.7465	2.74741e-11
CDO98275.1	817	jcf7180007807691	618	44.175	9.51e-159
CDO98276.1	1092	jcf7180007792395	855	72.1126	7.775e-17
CDO98277.1	933	jcf7180007739534	1008	80.8577	3.63875e-13
CDO98278.1	692	jcf7180007714048	139	51.079	2.08e-28
CDO98279.1	222	jcf7180007796715	214	66.822	8.31e-102
CDO98280.1	338	jcf7180007787956	288	76.736	2.05e-151
CDO98281.1	645	jcf7180007790384	172	63.372	8.38e-58
CDO98282.1	105	jcf7180007761801	138	58.696	8.73e-40
CDO98283.1	986	jcf7180007769505	628	85.249	0
CDO98284.1	235	jcf7180007801105	170	37.059	5.15e-20
CDO98285.1	541	jcf7180007835979	376	87.766	0
CDO98286.1	417	jcf7180007797817	417	70.983	0
CDO98287.1	174	jcf7180007820270	118	60.169	3.54e-30
CDO98288.1	455	jcf7180007782650	150	68.1383	1.01333e-12
CDO98289.1	532	jcf7180007779355	515	69.515	0
CDO98290.1	503	jcf7180007780061	698	67.8498	4.78e-17
CDO98291.1	514	jcf7180007759465	313	67.79	3.055e-15
CDO98292.1	464	jcf7180007759465	337	65.8505	4.665e-13
CDO98293.1	314	jcf7180007788601	279	77.292	5.75e-56
CDO98294.1	181	jcf7180007813583	161	77.7297	1.47e-26
CDO98295.1	222	jcf7180007718740	124	85.484	4.72e-74
CDO98296.1	279	jcf7180007804955	192	49.479	2.03e-52
CDO98298.1	418	jcf7180007766178	383	97.844	3.01e-45
CDO98299.1	284	jcf7180007831207	196	61.409	9.9335e-22
CDO98300.1	512	jcf7180007750763	512	72.266	0
CDO98301.1	392	jcf7180007744322	284	83.424	6.1e-32
CDO98302.1	621	jcf7180007767864	260	83.0053	9.56667e-18
CDO98303.1	425	jcf7180007787643	339	52.507	3.38e-77
CDO98304.1	98	jcf7180007733744	111	52.252	3.15e-32
CDO98305.1	241	jcf7180007711678	113	69.912	2.95e-34
CDO98306.1	579	jcf7180007724268	410	54.306	7.5e-23
CDO98307.1	603	jcf7180007715794	103	82.524	1.24e-52
CDO98308.1	139	jcf7180007831588	53	62.264	9.62e-15
CDO98309.1	1018	jcf7180007783537	1211	59.3753	1.00012e-13
CDO98310.1	923	jcf7180007709424	876	84.2298	1.93333e-20
CDO98311.1	928	jcf7180007708182	672	81.5447	3.31667e-13
CDO98312.1	454	jcf7180007737969	393	52.163	6.93e-113
CDO98314.1	571	jcf7180007709682	130	81.538	5.53e-21
CDO98315.1	356	jcf7180007820941	296	83.6729	5.20572e-23
CDO98316.1	1273	jcf7180007778783	515	67.1244	1.0264e-46
CDO98317.1	257	jcf7180007820439	105	43.81	6.51e-18
CDO98318.1	267	jcf7180007748549	346	66.5493	2.5834e-16
CDO98319.1	551	jcf7180007790662	247	42.51	1.86e-56
CDO98320.1	439	jcf7180007711857	277	79.061	6.25e-152
CDO98321.1	271	jcf7180007835219	214	89.252	4.7e-116
CDO98323.1	618	jcf7180007779597	355	70.704	3.49e-129
CDO98324.1	1297	jcf7180007783819	558	78.853	0
CDO98325.1	395	jcf7180007739605	403	58.4367	3.36667e-14
CDO98326.1	420	jcf7180007834995	104	68.269	3.14e-40
CDO98327.1	321	jcf7180007737534	147	72.0085	5.43e-43
CDO98328.1	341	jcf7180007793114	267	64.3083	8.9e-39
CDO98329.1	1039	jcf7180007788999	888	62.2678	8.35917e-16
CDO98330.1	116	jcf7180007794743	121	58.678	4.06e-19
CDO98332.1	167	jcf7180007760009	167	79.641	7.97e-86
CDO98333.1	205	jcf7180007792766	172	61.628	9.73e-31
CDO98334.1	737	jcf7180007747459	249	36.145	4.87e-36
CDO98335.1	617	jcf7180007743254	337	81.2276	1.68889e-12
CDO98336.1	571	jcf7180007709498	943	56.6035	9.5e-49
CDO98337.1	175	jcf7180007782416	172	66.839	1.14e-49
CDO98338.1	335	jcf7180007709616	247	82.6555	2.48e-12
CDO98339.1	324	jcf7180007720338	205	74.4922	8.84e-17
CDO98340.1	577	jcf7180007790858	313	84.6173	3.87133e-25
CDO98342.1	463	jcf7180007725189	151	68.1783	5.52e-38
CDO98343.1	434	jcf7180007716840	146	50.685	1.6e-24
CDO98344.1	590	jcf7180007831955	273	68.127	1.65001e-17
CDO98345.1	450	jcf7180007735569	295	53.8195	8.9e-17
CDO98346.1	164	jcf7180007718322	91	72.527	1.8e-40
CDO98348.1	602	jcf7180007727809	617	80.093	2.90333e-22
CDO98349.1	491	jcf7180007802327	604	72.817	6.06667e-15
CDO98350.1	486	jcf7180007802327	432	66.418	1.6375e-14
CDO98351.1	446	jcf7180007711192	428	91.3417	0
CDO98352.1	361	jcf7180007752150	246	70.305	1.76e-15
CDO98353.1	249	jcf7180007792246	219	57.078	6.16e-85
CDO98354.1	724	jcf7180007779688	639	69.797	0
CDO98355.1	216	jcf7180007807852	153	79.739	5.21e-81
CDO98356.1	221	jcf7180007716869	175	48.571	3.12e-44
CDO98357.1	692	jcf7180007743869	320	43.125	2.53e-45
CDO98358.1	252	jcf7180007716770	274	59.879	1.095e-27
CDO98359.1	292	jcf7180007781756	200	68.375	1.64e-15
CDO98361.1	86	jcf7180007784867	49	63.265	8.21e-12
CDO98362.1	192	jcf7180007781735	59	89.831	8.49e-22
CDO98363.1	932	jcf7180007789898	474	58.65	7.41e-136
CDO98365.1	477	jcf7180007716825	251	59.73	1.83501e-17
CDO98366.1	79	jcf7180007711238	32	93.75	2.28e-11
CDO98367.1	199	jcf7180007762204	51	81.2095	5.66e-12
CDO98368.1	593	jcf7180007753579	270	90.455	4.675e-26
CDO98369.1	301	jcf7180007766006	229	55.08	2.928e-24
CDO98370.1	135	jcf7180007766006	106	51.887	4.78e-25
CDO98371.1	777	jcf7180007739422	687	47.016	0
CDO98372.1	577	jcf7180007801306	512	72.187	0
CDO98373.1	349	jcf7180007836603	223	69.507	6.67e-76
CDO98374.1	588	jcf7180007734566	481	55.094	0
CDO98376.1	450	jcf7180007709396	110	80	4e-51
CDO98377.1	248	jcf7180007709396	227	85.803	3.475e-45
CDO98378.1	449	jcf7180007836183	612	68.6686	2.8e-21
CDO98379.1	535	jcf7180007726289	130	53.846	1.16e-34
CDO98380.1	632	jcf7180007758388	320	58.645	3.99e-89
CDO98381.1	1395	jcf7180007788395	387	87.5145	4.87e-12
CDO98382.1	369	jcf7180007724174	119	79.4115	3.08e-46
CDO98383.1	196	jcf7180007750681	74	75.932	4.75e-21
CDO98385.1	569	jcf7180007780667	140	93.3568	4.6e-18
CDO98387.1	351	jcf7180007712765	355	48.077	8.6e-17
CDO98389.1	416	jcf7180007813310	315	34.286	4.69e-55
CDO98390.1	495	jcf7180007743317	430	50.2407	2.8e-84
CDO98391.1	528	jcf7180007712038	422	61.5657	1.3e-15
CDO98392.1	467	jcf7180007789603	488	67.3865	1.36e-14
CDO98393.1	1212	jcf7180007788330	335	55.821	6.24e-95
CDO98394.1	538	jcf7180007831571	770	96.184	1.16e-137
CDO98395.1	209	jcf7180007812781	283	64.0267	1.99e-66
CDO98396.1	356	jcf7180007710547	273	36.63	1e-33
CDO98397.1	754	jcf7180007724496	603	67.094	5.075e-23
CDO98398.1	239	jcf7180007834696	212	58.4975	2.165e-12
CDO98399.1	277	jcf7180007813774	249	59.5273	1.19e-13
CDO98400.1	705	jcf7180007784269	634	68.5875	2.235e-70
CDO98401.1	418	jcf7180007783353	288	72.917	7.53e-125
CDO98402.1	478	jcf7180007779161	139	50.36	4.06e-32
CDO98403.1	399	jcf7180007762174	205	74.187	2.65233e-15
CDO98405.1	415	jcf7180007798656	216	82.395	8.55e-27
CDO98406.1	221	jcf7180007726000	127	44.094	5.09e-28
CDO98407.1	387	jcf7180007786878	354	79.306	2.5e-12
CDO98408.1	94	jcf7180007806764	75	65.333	1.37e-16
CDO98409.1	92	jcf7180007806764	93	50.538	1.31e-20
CDO98410.1	954	jcf7180007782227	476	85.299	7.36667e-13
CDO98411.1	707	jcf7180007786058	553	85.114	1.09e-21
CDO98412.1	933	jcf7180007761257	712	50.3885	1.395e-31
CDO98413.1	649	jcf7180007761257	732	50.9285	3.065e-24
CDO98414.1	646	jcf7180007761257	683	49.5335	2.345e-22
CDO98415.1	689	jcf7180007799412	293	66.553	2.82e-138
CDO98416.1	471	jcf7180007785782	200	65.5	7.07e-75
CDO98417.1	405	jcf7180007796890	305	61.4075	7.68e-98
CDO98418.1	294	jcf7180007796890	282	59.689	3.99e-98
CDO98419.1	976	jcf7180007737519	958	72.234	0
CDO98420.1	683	jcf7180007710742	359	66.7993	1.29e-15
CDO98421.1	1251	jcf7180007801767	1176	68.2189	1.7e-13
CDO98422.1	286	jcf7180007798393	191	66.492	1.97e-63
CDO98423.1	522	jcf7180007717933	163	73.5023	5.98667e-17
CDO98424.1	693	jcf7180007717860	290	80.6073	1.20667e-17
CDO98425.1	825	jcf7180007710260	477	72.0425	2.20718e-15
CDO98426.1	837	jcf7180007834838	513	68.5197	1.60573e-78
CDO98427.1	388	jcf7180007788843	245	50.204	1.69e-18
CDO98428.1	326	jcf7180007779536	141	73.7035	4.1e-55
CDO98429.1	592	jcf7180007748419	141	57.614	2.3206e-12
CDO98430.1	172	jcf7180007764227	118	60.169	3.95e-25
CDO98431.1	959	jcf7180007781204	601	77.569	2.375e-20
CDO98432.1	274	jcf7180007797978	303	71.287	1.51e-137
CDO98433.1	105	jcf7180007728957	99	94.949	3.48e-66
CDO98435.1	431	jcf7180007752539	443	67.9635	2.015e-18
CDO98436.1	315	jcf7180007782268	254	53.062	1.545e-11
CDO98437.1	477	jcf7180007784787	157	66.331	1.66e-17
CDO98438.1	118	jcf7180007823834	79	56.962	8.75e-15
CDO98439.1	237	jcf7180007716625	236	52.119	4.93e-54
CDO98441.1	203	jcf7180007800891	125	48	1.14e-26
CDO98443.1	595	jcf7180007790001	630	66.6275	2.75e-29
CDO98444.1	587	jcf7180007746817	131	92.366	1.1e-74
CDO98445.1	568	jcf7180007824740	281	65.9618	2.46114e-12
CDO98446.1	1209	jcf7180007708070	226	76.4265	6e-15
CDO98447.1	411	jcf7180007714103	453	61.1695	2.6e-22
CDO98448.1	156	jcf7180007804810	66	80.303	9.3e-30
CDO98449.1	684	jcf7180007740065	191	85.4873	2.14346e-13
CDO98451.1	457	jcf7180007729745	399	25.815	3.75e-15
CDO98452.1	438	jcf7180007710003	412	57.039	1.2e-153
CDO98453.1	543	jcf7180007729745	458	26.419	2.33e-23
CDO98454.1	312	jcf7180007710003	296	55.068	9.53e-96
CDO98455.1	472	jcf7180007710003	417	50.6	7.69e-126
CDO98456.1	482	jcf7180007710003	423	56.028	3.17e-132
CDO98457.1	348	jcf7180007710003	334	53.593	1.95e-108
CDO98458.1	132	jcf7180007834529	43	90.801	5.07e-13
CDO98459.1	225	jcf7180007834529	112	82.5013	8e-13
CDO98460.1	157	jcf7180007790454	134	81.819	6.2e-12
CDO98461.1	421	jcf7180007806987	161	67.502	4.33333e-15
CDO98462.1	699	jcf7180007813561	296	80.068	1.05e-146
CDO98466.1	607	jcf7180007787352	205	71.2527	1.29e-19
CDO98467.1	843	jcf7180007780531	762	64.173	0
CDO98468.1	299	jcf7180007789805	263	70.342	2.53e-88
CDO98469.1	668	jcf7180007724958	493	80.8415	9.2e-27
CDO98470.1	466	jcf7180007783724	213	81.49	1.785e-19
CDO98471.1	939	jcf7180007788170	609	81.4493	8.4e-112
CDO98473.1	384	jcf7180007835723	301	60.133	1.28e-77
CDO98474.1	1445	jcf7180007788264	736	71.215	1.36e-13
CDO98475.1	477	jcf7180007815074	182	59.89	1.89e-44
CDO98477.1	123	jcf7180007796188	116	57.759	1.91e-18
CDO98478.1	596	jcf7180007790339	411	53.4415	8.93e-37
CDO98479.1	664	jcf7180007782990	587	73.2617	1.82e-32
CDO98480.1	685	jcf7180007779393	305	82.623	7.02e-176
CDO98482.1	718	jcf7180007780292	374	36.096	1.81e-30
CDO98483.1	170	jcf7180007779455	116	78.022	2.13e-13
CDO98484.1	310	jcf7180007783086	292	84.656	1e-12
CDO98485.1	677	jcf7180007716557	644	60.4436	1.738e-16
CDO98486.1	159	jcf7180007813995	145	58.621	1.71e-41
CDO98487.1	175	jcf7180007783313	171	59.4185	3.69e-52
CDO98488.1	804	jcf7180007713390	610	75.452	4.9e-48
CDO98489.1	272	jcf7180007817708	287	73.171	4.33e-136
CDO98490.1	161	jcf7180007720195	88	34.091	2.09e-15
CDO98491.1	851	jcf7180007750404	469	66.3125	2.70633e-12
CDO98492.1	767	jcf7180007769303	720	66.8633	1.6875e-40
CDO98493.1	372	jcf7180007725218	446	63.86	1.14509e-22
CDO98494.1	167	jcf7180007817802	159	84.906	3.85e-77
CDO98495.1	115	jcf7180007814018	123	54.472	9e-28
CDO98496.1	231	jcf7180007709089	92	57.609	9.49e-17
CDO98497.1	414	jcf7180007762642	402	55.473	2.17e-132
CDO98498.1	907	jcf7180007781499	779	37.099	1.18e-134
CDO98499.1	403	jcf7180007709828	151	65.395	4.16e-42
CDO98500.1	655	jcf7180007783162	618	74.4212	8.64445e-16
CDO98501.1	260	jcf7180007759644	143	76.923	9.13e-72
CDO98502.1	272	jcf7180007762440	102	74.51	8.18e-44
CDO98503.1	490	jcf7180007714368	440	84.714	4.625e-58
CDO98504.1	261	jcf7180007795252	162	82.3227	2.43333e-20
CDO98505.1	244	jcf7180007760452	116	65.2553	2.41667e-13
CDO98506.1	204	jcf7180007760452	178	42.697	1.75e-17
CDO98507.1	331	jcf7180007708919	338	49.112	4.79e-97
CDO98508.1	280	jcf7180007760452	267	61.423	9.71e-99
CDO98509.1	90	jcf7180007760452	90	56.667	8.54e-21
CDO98510.1	157	jcf7180007786235	53	79.245	1.11e-18
CDO98511.1	659	jcf7180007796302	551	67.123	4.624e-21
CDO98512.1	373	jcf7180007736367	138	81.3795	3.43e-21
CDO98513.1	345	jcf7180007711503	296	77.8937	2.69e-19
CDO98514.1	306	jcf7180007711503	277	58.005	4.16e-24
CDO98515.1	788	jcf7180007741962	830	63.494	0
CDO98516.1	676	jcf7180007791908	134	71.642	5.15e-56
CDO98517.1	73	jcf7180007779102	71	63.38	1.63e-21
CDO98518.1	778	jcf7180007734735	368	33.681	3.26e-19
CDO98519.1	871	jcf7180007782881	798	33.208	7.47e-141
CDO98520.1	141	jcf7180007762252	64	69.4355	2.59e-15
CDO98521.1	435	jcf7180007746585	276	69.928	2.17e-101
CDO98522.1	66	jcf7180007751934	130	73.8465	4.725e-18
CDO98523.1	248	jcf7180007711197	248	73.387	6.3e-127
CDO98524.1	196	jcf7180007711197	194	70.103	6.46e-86
CDO98525.1	279	jcf7180007820257	255	67.843	2.87e-124
CDO98526.1	265	jcf7180007783562	258	67.829	2.88e-121
CDO98527.1	279	jcf7180007820257	255	67.843	3.06e-124
CDO98528.1	133	jcf7180007835306	289	53.7147	2.45e-11
CDO98529.1	312	jcf7180007820257	255	67.843	3.87e-125
CDO98530.1	267	jcf7180007783562	258	68.605	3.85e-130
CDO98531.1	221	jcf7180007711197	248	67.339	6.56e-109
CDO98532.1	958	jcf7180007793302	1045	68.2047	3.78889e-15
CDO98534.1	485	jcf7180007711130	487	53.388	1.84e-140
CDO98535.1	480	jcf7180007709123	921	70.5865	0
CDO98536.1	651	jcf7180007781970	595	50.8593	2.6036e-19
CDO98537.1	637	jcf7180007719046	659	61.457	0
CDO98538.1	563	jcf7180007791284	203	72.969	1.18e-16
CDO98540.1	511	jcf7180007785188	317	71.3	5.97e-119
CDO98542.1	271	jcf7180007715925	127	74.803	3.57e-46
CDO98543.1	309	jcf7180007784798	276	45.29	3.23e-56
CDO98544.1	352	jcf7180007729371	325	63.385	2.44e-111
CDO98545.1	237	jcf7180007775396	131	58.779	4.33e-31
CDO98546.1	270	jcf7180007780965	64	64.0625	1.89e-11
CDO98547.1	366	jcf7180007784483	118	60.169	5.48e-28
CDO98548.1	267	jcf7180007790059	208	44.6795	5.60001e-13
CDO98549.1	1237	jcf7180007787058	538	60.1012	1.1346e-33
CDO98550.1	320	jcf7180007781944	156	79.487	3.46e-69
CDO98551.1	818	jcf7180007799846	765	34.771	1.23e-95
CDO98552.1	205	jcf7180007789766	196	54.082	1.15e-62
CDO98553.1	821	jcf7180007741804	590	46.949	6.46e-148
CDO98554.1	209	jcf7180007710061	182	59.341	3e-65
CDO98555.1	214	jcf7180007710061	184	60.87	5.8e-60
CDO98556.1	823	jcf7180007741804	595	47.899	1.69e-152
CDO98557.1	207	jcf7180007710061	188	59.043	1.08e-65
CDO98558.1	212	jcf7180007710061	190	60.526	6.43e-62
CDO98559.1	212	jcf7180007710061	190	60.526	6.43e-62
CDO98560.1	214	jcf7180007760415	413	49.8477	3.23448e-18
CDO98562.1	247	jcf7180007800810	184	59.463	6.5e-24
CDO98563.1	629	jcf7180007709499	433	85.8335	3.115e-32
CDO98564.1	420	jcf7180007751089	41	80.488	4.2e-17
CDO98565.1	837	jcf7180007712430	691	75.4907	2.8917e-12
CDO98566.1	725	jcf7180007821638	296	92.8255	5.55e-61
CDO98567.1	391	jcf7180007750963	375	68	4.81e-103
CDO98569.1	364	jcf7180007791904	362	60.497	2.51e-152
CDO98571.1	343	jcf7180007791904	371	54.447	4.69e-135
CDO98572.1	613	jcf7180007747864	1799	30.7782	1.1185e-36
CDO98573.1	374	jcf7180007736471	349	53.295	4.85e-130
CDO98575.1	103	jcf7180007714077	71	53.521	1.03e-15
CDO98576.1	253	jcf7180007798724	219	64.1705	2.855e-12
CDO98577.1	430	jcf7180007712071	51	64.706	5.76e-12
CDO98578.1	327	jcf7180007812548	60	83.333	7.44e-27
CDO98579.1	875	jcf7180007781499	746	33.78	1.35e-108
CDO98580.1	875	jcf7180007781499	757	34.082	1.08e-112
CDO98581.1	211	jcf7180007802527	210	59.9395	3.35007e-26
CDO98582.1	348	jcf7180007797361	412	48.3465	3.59e-95
CDO98583.1	113	jcf7180007797361	145	45.517	7.38e-33
CDO98584.1	152	jcf7180007816636	181	58.564	1.33e-61
CDO98585.1	434	jcf7180007787570	192	40.104	1.17e-19
CDO98586.1	459	jcf7180007797361	402	48.8455	1.14e-94
CDO98587.1	796	jcf7180007788346	435	50.389	2.68e-82
CDO98588.1	149	jcf7180007797361	156	46.154	4.04e-35
CDO98589.1	1116	jcf7180007797361	663	46.9583	6.36667e-61
CDO98590.1	288	jcf7180007782302	286	49.822	1.13e-62
CDO98591.1	236	jcf7180007804877	144	55.556	1.04e-44
CDO98592.1	446	jcf7180007769274	135	74.166	3.39e-15
CDO98593.1	117	jcf7180007724597	74	74.324	9.47e-27
CDO98594.1	833	jcf7180007837823	890	68.918	2.145e-17
CDO98595.1	550	jcf7180007743757	373	72.5777	9.12e-144
CDO98596.1	465	jcf7180007790840	367	84.1648	8.50008e-15
CDO98597.1	236	jcf7180007788105	301	32.89	9.92e-33
CDO98598.1	563	jcf7180007763592	219	68.768	1.62e-77
CDO98599.1	918	jcf7180007724597	912	59.43	0
CDO98600.1	489	jcf7180007798957	143	70.629	2.51e-43
CDO98601.1	480	jcf7180007719973	460	81.9903	6.93333e-70
CDO98602.1	535	jcf7180007779117	508	58.006	1.17e-106
CDO98603.1	171	jcf7180007757258	96	54.167	1.04e-25
CDO98604.1	184	jcf7180007792555	188	59.0513	1.39e-35
CDO98606.1	860	jcf7180007757644	949	65.0449	1.0475e-11
CDO98607.1	1069	jcf7180007779941	1176	79.3811	5.03529e-12
CDO98608.1	712	jcf7180007732474	196	82.8567	2.91333e-14
CDO98609.1	457	jcf7180007709338	462	41.775	1.25e-102
CDO98610.1	389	jcf7180007748580	72	97.222	1.21e-39
CDO98611.1	336	jcf7180007815378	116	73.276	2.56e-51
CDO98612.1	239	jcf7180007793462	113	69.027	1.17e-47
CDO98613.1	714	jcf7180007734129	328	76.3007	8.53333e-27
CDO98614.1	147	jcf7180007798172	151	92.537	5.49e-70
CDO98615.1	192	jcf7180007798172	193	93.763	4.65e-22
CDO98618.1	783	jcf7180007729856	160	58.75	9.3e-51
CDO98619.1	781	jcf7180007753255	82	87.805	9.54e-40
CDO98620.1	94	jcf7180007724462	97	63.654	9.97e-22
CDO98621.1	355	jcf7180007782754	387	90.574	6.03333e-16
CDO98622.1	117	jcf7180007816282	53	73.585	3.61e-19
CDO98623.1	385	jcf7180007811854	122	83.4497	7.2e-17
CDO98624.1	1182	jcf7180007779081	868	74.7465	4.99e-154
CDO98625.1	233	jcf7180007710097	233	63.394	2.45e-65
CDO98626.1	1166	jcf7180007762781	511	78.104	2.94333e-17
CDO98627.1	272	jcf7180007806357	185	84.3665	5.25e-20
CDO98628.1	525	jcf7180007835465	285	71.101	1.656e-11
CDO98629.1	510	jcf7180007765564	548	63.9288	1.63e-68
CDO98630.1	263	jcf7180007797031	307	57.266	7.2e-42
CDO98631.1	188	jcf7180007834168	85	48.235	9.16e-18
CDO98632.1	436	jcf7180007736478	135	98.519	1.83e-92
CDO98633.1	80	jcf7180007716820	59	66.102	1.43e-16
CDO98634.1	308	jcf7180007716922	314	70.701	1.58e-104
CDO98636.1	302	jcf7180007708351	286	70.026	5.70001e-55
CDO98637.1	178	jcf7180007801395	167	64.671	1.15e-62
CDO98638.1	501	jcf7180007812510	492	70.325	0
CDO98639.1	149	jcf7180007780504	128	92.969	4.96e-76
CDO98640.1	594	jcf7180007749621	179	73.1442	6.05e-17
CDO98641.1	380	jcf7180007719235	212	70.0477	2.25705e-16
CDO98642.1	357	jcf7180007787180	349	76.504	0
CDO98643.1	482	jcf7180007727970	482	78.631	0
CDO98644.1	251	jcf7180007780144	236	57.43	4.67e-34
CDO98645.1	457	jcf7180007746619	307	59.8925	1.305e-22
CDO98646.1	332	jcf7180007742579	345	61.8787	4.26667e-26
CDO98647.1	424	jcf7180007759960	387	79.0975	1e-37
CDO98648.1	193	jcf7180007720272	73	90.411	2.66e-43
CDO98650.1	841	jcf7180007782774	441	63.016	6.9188e-13
CDO98651.1	129	jcf7180007746196	131	57.252	3.8e-32
CDO98652.1	387	jcf7180007781275	244	52.459	5.98e-69
CDO98653.1	832	jcf7180007807659	115	88.696	7.64e-63
CDO98654.1	326	jcf7180007805683	324	76.543	5.85e-173
CDO98655.1	431	jcf7180007786209	145	94.8865	2.76e-71
CDO98656.1	261	jcf7180007778610	178	89.0863	2.34333e-29
CDO98657.1	790	jcf7180007765018	522	72.7435	4.935e-49
CDO98658.1	375	jcf7180007785772	186	70.9815	2.41e-13
CDO98659.1	277	jcf7180007785772	130	86.923	2.37e-57
CDO98660.1	519	jcf7180007724425	171	50.508	2.325e-14
CDO98661.1	376	jcf7180007787997	88	81.702	1.55e-25
CDO98662.1	233	jcf7180007724428	67	82.09	1.72e-30
CDO98663.1	446	jcf7180007710546	145	75.3955	2.56e-49
CDO98664.1	316	jcf7180007834983	149	48.993	2.3e-26
CDO98665.1	489	jcf7180007719398	523	69.9498	1.328e-12
CDO98666.1	567	jcf7180007724622	448	72.768	0
CDO98668.1	704	jcf7180007737216	528	44.551	4.115e-24
CDO98669.1	372	jcf7180007779014	57	96.491	2.15e-28
CDO98670.1	364	jcf7180007764918	116	68.103	5.11e-43
CDO98671.1	192	jcf7180007765335	36	83.333	4.81e-12
CDO98672.1	444	jcf7180007793111	208	50	9.98e-60
CDO98674.1	581	jcf7180007737678	364	75.7433	1.85333e-35
CDO98675.1	369	jcf7180007723657	328	43.902	1.08e-88
CDO98678.1	432	jcf7180007781169	442	78.054	0
CDO98679.1	575	jcf7180007803798	93	50.538	2.36e-17
CDO98680.1	832	jcf7180007816561	338	77.9742	2.675e-25
CDO98683.1	499	jcf7180007749815	560	44.4545	1.05703e-11
CDO98684.1	705	jcf7180007720890	144	80.1423	3.39e-44
CDO98685.1	295	jcf7180007825179	275	42.545	2.09e-38
CDO98687.1	483	jcf7180007709752	301	29.236	1.17e-21
CDO98688.1	635	jcf7180007749698	511	79.6258	7.9089e-13
CDO98689.1	344	jcf7180007818213	197	65.99	6.28e-89
CDO98690.1	453	jcf7180007718598	515	59.022	5.8e-14
CDO98692.1	692	jcf7180007789218	303	44.554	3e-76
CDO98693.1	435	jcf7180007724090	425	46.118	9.63e-134
CDO98694.1	312	jcf7180007813782	154	81.066	2.515e-26
CDO98695.1	898	jcf7180007778739	946	77.3	4.63333e-15
CDO98697.1	365	jcf7180007778739	465	67.8277	7.8e-37
CDO98699.1	271	jcf7180007786981	239	58.382	8.5e-12
CDO98700.1	522	jcf7180007761341	637	64.0202	4.76e-20
CDO98701.1	361	jcf7180007761341	653	67.6578	1.988e-12
CDO98702.1	984	jcf7180007789400	997	69.366	3.94444e-24
CDO98703.1	510	jcf7180007789400	374	84.492	0
CDO98704.1	393	jcf7180007789400	393	96.438	0
CDO98705.1	137	jcf7180007838350	56	71.871	2.38e-11
CDO98706.1	306	jcf7180007797370	356	26.124	1.3e-26
CDO98707.1	1677	jcf7180007728363	1628	73.1083	6.58158e-29
CDO98708.1	251	jcf7180007788028	68	64.706	2.89e-18
CDO98710.1	2046	jcf7180007779200	677	46.491	1.345e-31
CDO98711.1	295	jcf7180007835664	233	82.403	3.13e-133
CDO98712.1	77	jcf7180007835664	58	87.931	3.2e-28
CDO98714.1	407	jcf7180007814876	135	59.3477	8.80008e-14
CDO98715.1	156	jcf7180007798355	156	98.718	2.97e-82
CDO98716.1	581	jcf7180007798355	647	73.3167	0
CDO98717.1	327	jcf7180007798355	331	75.0147	9.1e-63
CDO98718.1	762	jcf7180007711612	240	58.4203	8.6e-65
CDO98719.1	753	jcf7180007744293	449	53.229	4.57e-143
CDO98721.1	4283	jcf7180007789396	813	75.1074	2.25714e-35
CDO98722.1	618	jcf7180007805630	789	58.7228	2.55e-24
CDO98723.1	394	jcf7180007836996	321	75.701	6.45e-157
CDO98724.1	505	jcf7180007836996	513	83.2785	2.2e-26
CDO98725.1	109	jcf7180007753643	61	88.525	6.36e-29
CDO98726.1	341	jcf7180007730146	367	66.851	2.555e-42
CDO98727.1	429	jcf7180007768195	342	83.3817	4.325e-27
CDO98728.1	1138	jcf7180007735473	1059	79.1129	9.01801e-15
CDO98729.1	1033	jcf7180007760478	836	65.2338	3.41084e-12
CDO98731.1	652	jcf7180007785816	464	80.569	1.15144e-20
CDO98732.1	281	jcf7180007748992	362	58.287	5.19e-124
CDO98733.1	521	jcf7180007748992	263	54.753	4.21e-76
CDO98734.1	121	jcf7180007708931	74	80.147	3.22e-12
CDO98735.1	313	jcf7180007819842	159	66.667	7.58e-57
CDO98736.1	544	jcf7180007717881	473	73.9016	4.03e-19
CDO98738.1	88	jcf7180007761273	89	60.674	2.38e-26
CDO98739.1	565	jcf7180007778732	569	62.8105	1.48167e-11
CDO98740.1	178	jcf7180007779826	173	49.133	1.73e-30
CDO98741.1	185	jcf7180007716968	354	58.449	2.11e-48
CDO98743.1	247	jcf7180007836921	187	59.893	5.86e-30
CDO98744.1	106	jcf7180007726870	95	77.815	2.4e-13
CDO98745.1	410	jcf7180007793810	145	73.664	1.45e-46
CDO98746.1	857	jcf7180007788930	187	32.62	1.71e-15
CDO98747.1	272	jcf7180007785549	280	87.0512	2.22e-116
CDO98748.1	338	jcf7180007747239	191	74.1935	1.06e-16
CDO98749.1	191	jcf7180007754059	123	60.976	1.02e-32
CDO98752.1	800	jcf7180007752902	193	88.387	1.12233e-23
CDO98753.1	342	jcf7180007801103	299	54.849	1.91e-90
CDO98754.1	265	jcf7180007726705	118	83.051	9.22e-66
CDO98755.1	370	jcf7180007837660	347	72.746	8.98e-12
CDO98756.1	348	jcf7180007779883	431	47.332	1.9e-119
CDO98758.1	811	jcf7180007743666	748	74.6021	1.21875e-12
CDO98760.1	881	jcf7180007800777	411	91.971	0
CDO98761.1	608	jcf7180007779217	623	87.6273	5.01722e-14
CDO98762.1	54	jcf7180007790872	54	70.37	2.77e-12
CDO98763.1	409	jcf7180007787542	599	63.3673	6.5e-16
CDO98764.1	180	jcf7180007816861	176	76.136	1.27e-88
CDO98765.1	859	jcf7180007782739	807	71.995	0
CDO98766.1	157	jcf7180007782739	104	79.808	2.26e-50
CDO98767.1	1125	jcf7180007709571	780	38.79	7.2e-19
CDO98768.1	676	jcf7180007736673	811	70.6598	4.00912e-13
CDO98769.1	95	jcf7180007715455	92	82.7765	7.45e-14
CDO98770.1	644	jcf7180007715455	516	71.2241	2.78931e-12
CDO98771.1	592	jcf7180007715455	473	84.9849	1.53761e-16
CDO98772.1	113	jcf7180007781788	105	64.177	2.565e-11
CDO98773.1	297	jcf7180007781788	148	54.054	1.1e-43
CDO98774.1	301	jcf7180007781788	260	79.8085	3.375e-16
CDO98775.1	595	jcf7180007836996	598	60.87	0
CDO98776.1	597	jcf7180007836996	590	55.085	0
CDO98777.1	231	jcf7180007746885	105	78.095	5.24e-48
CDO98778.1	114	jcf7180007818526	67	74.627	1.25e-26
CDO98779.1	270	jcf7180007729895	134	90.299	7.63e-74
CDO98780.1	52	jcf7180007753170	51	94.118	1.41e-12
CDO98782.1	759	jcf7180007812236	278	75.6775	1.28099e-12
CDO98783.1	115	jcf7180007802235	146	66.887	5.15e-36
CDO98784.1	573	jcf7180007836996	405	34.074	2.56e-59
CDO98785.1	61	jcf7180007781000	62	93.016	1.89e-22
CDO98786.1	919	jcf7180007711055	429	76.077	2.16e-84
CDO98787.1	568	jcf7180007711116	566	48.763	0
CDO98788.1	770	jcf7180007711342	870	66.037	8.275e-42
CDO98791.1	708	jcf7180007709716	719	67.177	0
CDO98792.1	196	jcf7180007738771	92	44.565	5.2e-21
CDO98793.1	463	jcf7180007736696	183	43.169	9.99e-48
CDO98794.1	500	jcf7180007787268	173	73.965	6.52e-16
CDO98795.1	357	jcf7180007793793	158	51.899	2.4e-48
CDO98796.1	930	jcf7180007710136	806	59.3005	4.89e-89
CDO98797.1	124	jcf7180007710136	69	53.623	1.85e-13
CDO98798.1	255	jcf7180007725539	217	65.654	1.05e-13
CDO98799.1	528	jcf7180007821747	384	77.8355	1.4275e-19
CDO98800.1	530	jcf7180007815018	475	79.266	7.42e-19
CDO98801.1	330	jcf7180007760339	333	72.4143	3.06767e-36
CDO98803.1	645	jcf7180007838317	639	75.6595	6.75e-66
CDO98804.1	675	jcf7180007838317	824	76.1547	4.1e-18
CDO98807.1	415	jcf7180007755473	370	63.227	5.80038e-26
CDO98808.1	148	jcf7180007791413	118	56.78	8.63e-27
CDO98809.1	159	jcf7180007791413	157	70.701	1.4e-68
CDO98810.1	165	jcf7180007711077	156	78.895	3.04e-54
CDO98811.1	222	jcf7180007788874	222	59.459	4.07e-79
CDO98812.1	160	jcf7180007782894	161	85.6715	1.83e-74
CDO98813.1	286	jcf7180007812144	315	51.746	2.71e-50
CDO98814.1	606	jcf7180007714042	220	78.745	4.96e-13
CDO98815.1	653	jcf7180007740100	291	48.701	4.01e-16
CDO98816.1	260	jcf7180007740100	144	72.353	4.04e-42
CDO98818.1	350	jcf7180007760257	49	67.347	3.42e-13
CDO98819.1	295	jcf7180007725362	115	91.459	7.9e-14
CDO98820.1	345	jcf7180007725362	359	66.3685	4.575e-34
CDO98821.1	244	jcf7180007797025	236	64.725	1.605e-19
CDO98822.1	376	jcf7180007796504	196	67.6983	2.85e-60
CDO98823.1	124	jcf7180007730124	130	57.7705	5.15009e-14
CDO98824.1	1145	jcf7180007730124	1055	75.9892	4.46687e-12
CDO98825.1	189	jcf7180007836040	61	77.049	1.04e-25
CDO98826.1	260	jcf7180007791587	135	58.519	3.28e-24
CDO98827.1	505	jcf7180007788857	536	72.4	3.13e-26
CDO98829.1	262	jcf7180007812728	198	89.6222	2.255e-14
CDO98830.1	405	jcf7180007732523	443	57.2403	3.52e-122
CDO98831.1	829	jcf7180007822350	288	42.708	1.12e-65
CDO98832.1	569	jcf7180007812093	563	64.095	0
CDO98833.1	545	jcf7180007736055	513	65.8375	0
CDO98834.1	566	jcf7180007736055	546	63.9245	0
CDO98835.1	725	jcf7180007797152	675	51.7487	8.47143e-25
CDO98836.1	188	jcf7180007750138	94	61.702	5.63e-17
CDO98837.1	329	jcf7180007748557	331	55.141	7.99e-104
CDO98838.1	321	jcf7180007748557	332	58.2995	2.64e-110
CDO98839.1	225	jcf7180007721582	165	40.606	3.07e-28
CDO98840.1	967	jcf7180007739941	299	71.392	5.925e-13
CDO98841.1	243	jcf7180007766538	146	89.0317	5.571e-15
CDO98842.1	537	jcf7180007793083	363	71.1778	5.725e-14
CDO98843.1	502	jcf7180007778779	492	80.691	0
CDO98844.1	141	jcf7180007801743	108	48.148	1.14e-12
CDO98845.1	124	jcf7180007779526	45	60	5.98e-12
CDO98846.1	1436	jcf7180007835457	426	72.657	2.715e-20
CDO98847.1	726	jcf7180007709685	715	74.912	1.60444e-19
CDO98848.1	250	jcf7180007782422	126	51.786	1.23e-28
CDO98849.1	403	jcf7180007791847	417	72.902	3.91e-134
CDO98850.1	151	jcf7180007726604	93	67.742	6.7e-33
CDO98851.1	464	jcf7180007715663	350	95.2935	1.815e-75
CDO98853.1	239	jcf7180007781239	221	61.538	3.04e-91
CDO98854.1	212	jcf7180007737657	199	57.789	2.89e-61
CDO98855.1	98	jcf7180007716035	31	100	7.07e-15
CDO98856.1	1327	jcf7180007794356	245	64.898	9.82e-103
CDO98858.1	350	jcf7180007780628	350	76.571	5.1e-157
CDO98859.1	1354	jcf7180007838311	1353	74.3164	2.57715e-14
CDO98860.1	168	jcf7180007816158	205	54.634	3.34e-60
CDO98861.1	159	jcf7180007794349	126	71.5707	1.51747e-19
CDO98862.1	812	jcf7180007789008	573	78.2968	3.64071e-13
CDO98863.1	511	jcf7180007791842	138	68.6225	1.275e-11
CDO98864.1	1020	jcf7180007720285	964	44.9637	4.355e-78
CDO98866.1	875	jcf7180007778908	674	79.2576	5.06e-12
CDO98867.1	295	jcf7180007787588	341	50.733	1.53e-83
CDO98868.1	628	jcf7180007750945	73	61.644	1.07e-16
CDO98869.1	1342	jcf7180007833618	1380	48.478	0
CDO98870.1	195	jcf7180007758927	112	62.5	1.23e-39
CDO98871.1	931	jcf7180007780282	674	77.6607	2.24201e-15
CDO98873.1	463	jcf7180007780516	137	87.497	1.28e-56
CDO98874.1	460	jcf7180007733585	464	86.207	0
CDO98876.1	138	jcf7180007812919	137	58.394	5.89e-34
CDO98877.1	301	jcf7180007725684	338	50.449	1.08e-12
CDO98878.1	82	jcf7180007722793	56	76.786	6.56e-22
CDO98879.1	431	jcf7180007788620	424	68.632	0
CDO98880.1	242	jcf7180007716105	49	81.633	2.73e-17
CDO98881.1	411	jcf7180007714770	406	73.9857	1.32333e-14
CDO98882.1	314	jcf7180007719441	256	47.656	2.78e-18
CDO98884.1	744	jcf7180007710013	708	35.028	7.35e-123
CDO98885.1	363	jcf7180007780519	427	70.6735	3.88e-79
CDO98886.1	1677	jcf7180007745958	1012	65.3188	1.348e-11
CDO98887.1	471	jcf7180007734897	133	54.135	1e-33
CDO98888.1	149	jcf7180007770667	106	46.226	7.89e-14
CDO98889.1	388	jcf7180007710559	290	41.379	1.94e-74
CDO98890.1	396	jcf7180007710559	313	41.853	5.01e-77
CDO98891.1	493	jcf7180007807237	391	72.3878	2.824e-13
CDO98892.1	337	jcf7180007781445	355	69.014	2.94e-152
CDO98893.1	630	jcf7180007721831	538	77.7513	6.36667e-39
CDO98894.1	383	jcf7180007762230	349	35.53	1.57e-50
CDO98895.1	482	jcf7180007711053	147	87.7835	2.505e-25
CDO98896.1	297	jcf7180007711559	93	51.613	1.81e-25
CDO98897.1	563	jcf7180007762216	412	73.7627	5.16667e-12
CDO98898.1	710	jcf7180007788991	149	78.523	1.14e-52
CDO98899.1	102	jcf7180007741200	102	86.275	1.35e-61
CDO98900.1	102	jcf7180007741200	102	90.196	2.21e-64
CDO98901.1	513	jcf7180007823035	342	92.868	6.25e-79
CDO98902.1	1088	jcf7180007741627	546	39.56	6.7e-113
CDO98904.1	355	jcf7180007806481	173	73.8523	1.253e-29
CDO98906.1	267	jcf7180007837799	86	83.5207	4.8e-28
CDO98907.1	402	jcf7180007780147	47	70.213	7.07e-12
CDO98908.1	80	jcf7180007768003	89	41.573	5.97e-14
CDO98909.1	196	jcf7180007800947	85	65.882	5.68e-23
CDO98913.1	415	jcf7180007836574	682	74.8343	1.41e-45
CDO98914.1	594	jcf7180007711528	428	50.467	5.36e-105
CDO98915.1	250	jcf7180007747170	93	65.591	1.32e-38
CDO98916.1	350	jcf7180007783880	161	82.3607	2.175e-22
CDO98917.1	559	jcf7180007737678	291	90.2197	9.9e-38
CDO98919.1	540	jcf7180007778985	484	70.661	0
CDO98920.1	348	jcf7180007789122	376	55.6393	3.92e-15
CDO98921.1	400	jcf7180007779488	135	61.1435	1.75e-16
CDO98922.1	540	jcf7180007782991	489	70.0448	1.542e-27
CDO98923.1	316	jcf7180007826144	264	36.364	9.74e-34
CDO98926.1	336	jcf7180007710098	263	48.289	7.04e-71
CDO98927.1	226	jcf7180007799300	94	64.894	3.6e-29
CDO98928.1	523	jcf7180007738801	304	81.7518	5.35e-12
CDO98929.1	623	jcf7180007779516	623	66.292	0
CDO98930.1	1029	jcf7180007779953	1075	52.93	0
CDO98931.1	1158	jcf7180007741196	1074	57.027	6.45e-20
CDO98932.1	428	jcf7180007835675	263	59.1205	2.3545e-30
CDO98933.1	273	jcf7180007710098	280	43.929	7.21e-65
CDO98934.1	325	jcf7180007710098	263	44.867	2.09e-64
CDO98935.1	717	jcf7180007728882	711	66.782	5.93333e-13
CDO98936.1	60	jcf7180007711065	54	83.333	7.9e-24
CDO98937.1	105	jcf7180007711065	123	81.8255	8.1e-19
CDO98938.1	267	jcf7180007709839	53	84.906	1.72e-22
CDO98939.1	781	jcf7180007710431	494	64.7514	1.9052e-14
CDO98940.1	488	jcf7180007729618	254	66.2738	4.36667e-13
[truncated: 20,253 more rows]
