# Supplementary material for: First Genomic Insights Into The <em>Mandevilla</em> Genus
Source: Preprints.org preprint supplement (doi:10.20944/preprints202204.0255.v1), 2022-04-27
Supplement: Supplementary file 1 [file supplementary › Table S3.xlsx]

## Sheet: Table S3
Table S3. Results obtained by using 10 amino acid sequences associated to enzymes involved in the biosynthesis of the three main MIAs (i.e. catharanthine, tabersonine and vincadifformine) in Catharanthus roseus (Apocynaceae) as query in a tBLASTn-based approach (E-value ≤ 1e-40) against the assembled genome of Mandevilla.
Query (Catharanthus roseus)	Abbr.	Subject (Mandevilla)	Average similarity	Alignment length	SNP	IN/DEL	qstart	qend	substart	subend	E-value	bit score	Query length	Subject length
AVM85920.1_hydrolase_1_[Catharanthus_roseus]	HL1	jcf7180007812597	48265	317	149	6	8	318	217	1140	2.32e-097	298	330	1141
AVM85921.1_hydrolase_2_[Catharanthus_roseus]	HL2	jcf7180007709631	51988	327	140	9	3	320	110	1066	1.75e-093	301	320	2726
AVM85922.1_hydrolase_3_[Catharanthus_roseus]	HL3	jcf7180007788326	49843	319	153	4	5	320	282	1226	6.63e-104	316	321	1283
AVM85923.1_hydrolase_4_[Catharanthus_roseus]	HL4	jcf7180007789215	49235	327	140	5	6	313	2960	2001	5.86e-088	293	314	6135
AVM85916.1_geissoschizine_oxidase_[Catharanthus_roseus]	GO	jcf7180007834514	41748	206	119	1	290	495	1539	925	2.13e-092	196	501	5690
AVM85916.1_geissoschizine_oxidase_[Catharanthus_roseus]	GO	jcf7180007834514	37548	261	155	4	42	298	2381	1611	2.13e-092	164	501	5690
AVM85917.1_redox_1_[Catharanthus_roseus]	Redox1	jcf7180007785191	49855	345	96	2	82	349	1056	22	2.28e-069	228	354	1238
AVM85915.1_geissoschizine_synthase_[Catharanthus_roseus]	GS	jcf7180007780949	51714	350	167	2	12	361	4422	3379	5.81e-098	322	364	4594
AVM85919.1_stemmadenine_O-acetyltransferase_[Catharanthus_roseus]	SAT	jcf7180007786565	44630	419	209	9	4	401	5808	4558	1.60e-107	353	421	5931
AYE56095.1_O-acetylstemmadenine_oxidase_[Catharanthus_roseus]	ASO	jcf7180007708834	49405	504	245	7	27	523	283	1785	1.27e-144	462	529	6163
