# Supplementary material for: First Genomic Insights Into The <em>Mandevilla</em> Genus
Source: Preprints.org preprint supplement (doi:10.20944/preprints202204.0255.v1), 2022-04-27
Supplement: Supplementary file 1 [file supplementary › Table S4.xlsx]

## Sheet: Table S4
Table S4. Primer pairs randomly designed on the newly assembled genome of Mandevilla and able to amplify as many SSR loci. For each SSR locus, SSR name, SSR-containing contig, location of each SSR-containing contig mapped onto the Coffea arabica genome, primer sequences, mean SSR locus size, melting temperatures, anchor used and SSR motif are reported.
SSR	SSR-containing Contig	Coffea Accession	Coffea Chr	Primer F	Primer R	Marker Size	Forward primer Tm (°C)	Reverse primer Tm (°C)	Anchor	Motif
SSR_01	jcf7180007709438	NC_039901.1	Chr_2e	CCCCTCAAGCTTCACAATTA	TCCATTTGAACTTCATGGGA	268	55.3	54.5	PAN1	(TG)11
SSR_02	jcf7180007709990	NC_039915.1	Chr_9e	ATTTGTTTGCAACCTCCATG	CCGCAACTCAAACTCAAATT	327	55	55.1	PAN1	(GAA)7
SSR_03	jcf7180007711233	NC_039913.1	Chr_8c	GAAAACCAAAATCCTCCAGC	GATGGTGTGGGAATTGAGTA	282	55.1	54.7	PAN2	(CTT)10
SSR_04	jcf7180007715403	NC_039901.1	Chr_2e	ACGAGGAAGACCAAGAAAAG	AACTACTAACCGAACCGAAC	306	55.3	55.2	PAN2	(AG)20
SSR_05	jcf7180007717710	NC_039901.1	Chr_2e	AGCCTTGTGTGTGGAATAAT	ATGTAAACAATGACCCCTCC	258	54.9	55	PAN3	(AT)10
SSR_06	jcf7180007726993	NC_039905.1	Chr_4e	GAGATACATAAGCAGGGCAT	TATGCAACATCTTCAGGAGG	395	54.7	54.8	PAN2	(TCT)8
SSR_07	jcf7180007766194	NC_039906.1	Chr_5e	GATCTCAATCCTGGACTCAC	GGTACTCATAAGCCAACCAA	120	55	55	PAN2	(ATT)8
SSR_08	jcf7180007780515	NC_039904.1	Chr_4c	CCTAGACTGCACCATCAATT	TGGATAGGTCTTGGTCTTTT	359	55.1	53.5	PAN3	(TC)27(AC)20
SSR_09	jcf7180007780963	NC_039917.1	Chr_10c	CTCAAGGTGTTTAATGTGCC	AGCTTATTACATACACCCTCT	335	54.9	53.4	PAN3	(CA)10
SSR_10	jcf7180007782136	NC_039906.1	Chr_5e	AACGCTCCTAAGTTGAAAGA	CTTCATCTCAACCTCCATCC	185	54.6	55.2	PAN3	(GA)16
SSR_11	jcf7180007784713	NC_039905.1	Chr_4e	TTACCTTGTTCGCAGCTTAT	ATTTTCACATGCATCACACC	233	55.1	54.8	PAN3	(TC)11
SSR_12	jcf7180007787041	NC_039912.1	Chr_8e	TGAAATAAAGGGTTAGGGCA	TCACTAATCCAGACAATCACA	153	54.2	54.3	PAN3	(GA)10
SSR_13	jcf7180007788101	NC_039899.1	Chr_1e	GTTTCCATACCAAATAGCACC	CCTCAAGACTGCACATAAAC	266	54.9	54.3	M13	(CT)11
SSR_14	jcf7180007788340	NC_039898.1	Chr_1c	CCCTTGCCTTCTTATGGTTT	ATGGAAAAGGCACACTGAAA	199	55.6	55.7	PAN2	(TG)11
SSR_15	jcf7180007796376	NC_039910.1	Chr_7c	TGAGGCACATACCATAGAGA	AATTTCTTGTCGTGGGCTAT	223	55	55	PAN3	(TTG)7
SSR_16	jcf7180007805205	NC_039910.1	Chr_7c	ATTCCTCCTCTCTCATCTCC	TGAAAATCAGCAGCAAAGC	103	55.1	54.9	M13	(CAA)7
SSR_17	jcf7180007815209	NC_039908.1	Chr_6c	CTTTCTGCCTTTACTCCCTTA	ATATCGGAACTCAGGACGT	149	54.9	55.2	PAN1	(AAT)7
SSR_18	jcf7180007826207	NC_039900.1	Chr_2c	ATGAATTGAAGTTGCCGCA	ATCCTAATCTCCCCACTCTG	300	56.1	55.4	M13	(TAA)18
SSR_19	jcf7180007832353	NC_039899.1	Chr_1e	TTGGGCACTTTCTCATTTGA	CAGGTCTGTTGGCATCATATA	257	55.4	55.2	PAN2	(CTT)9
SSR_20	jcf7180007832392	NC_039906.1	Chr_5e	TTCCCATTAAAGCACTTGGT	AAAGCCACTCATCATGCATA	231	55.1	55.1	PAN2	(GAG)8
SSR_21	jcf7180007832681	NC_039911.1	Chr_7e	GCAAGGAATCTAGAAACCGA	GTTTTGTTGGAAAGGGAAGG	334	55.2	55	PAN2	(AT)10
SSR_22	jcf7180007833586	NC_039912.1	Chr_8e	ATTTTGATTGCAGTTCCCAC	GATGGAGGAAGAGAAGATGG	403	54.7	54.6	PAN3	(GA)11
SSR_23	jcf7180007833885	NC_039904.1	Chr_4c	GATTCCAATTCCGACTAGCT	TCGAACTGGGGAATTAACAA	324	54.9	54.6	M13	(ATT)9
SSR_24	jcf7180007835344	NC_039902.1	Chr_3c	CTCTGGACATGAGTTACACT	CTTAGATAGTGCCAGTGACC	201	54.1	55	M13	(CTA)7
SSR_25	jcf7180007835353	NC_039902.1	Chr_3c	CACAAGGTTAAGAGGAAGCA	GATTAAGTGATGGGGTGAGG	271	55.3	55.2	PAN3	(TC)13(TA)19
SSR_26	jcf7180007835394	NC_039900.1	Chr_2c	CTCGGTGCAAGGATAAACT	TTGATTGAAAAGGAATGGTCG	216	54.9	54.8	PAN2	(ATA)7
SSR_27	jcf7180007837431	NC_039905.1	Chr_4e	AGTTCAATAGCGAGGACATT	GGAAAACTGCTATTTGTGCT	223	54.5	54.5	M13	(AC)10
SSR_28	jcf7180007837577	NC_039916.1	Chr_10e	GAGATCAATGAGGATGGGAC	CACTTACAGTTTCAGGTCCT	415	55	54.6	M13	(TGA)7
SSR_29	jcf7180007837889	NC_039907.1	Chr_5c	TCTACATTCTCTTCCGCATG	GATTAAGATCCATCCCTCCTG	417	55	54.9	PAN1	(TAA)7
SSR_30	jcf7180007735964	NC_039916.1	Chr_10e	CAACACCTATACCTCACACC	GAGTTTGTAGTCTCCAACCTT	233	55.2	55.2	M13	(AG)18
SSR_31	jcf7180007740007	NC_039905.1	Chr_4e	CCAATGGCAGCAATTAAACT	TGCAACAGGTTTCAAGTTTC	363	54.8	54.9	M13	(TA)11(TG)9
SSR_32	jcf7180007747705	NC_039908.1	Chr_6c	AGAGTCAATTTAGGGGCAAC	GCAACTCCCTTTCCAATACT	294	55.3	55.3	PAN3	(TTC)8
SSR_33	jcf7180007748819	NC_039907.1	Chr_5c	AAGGGAGAAGTAAAAGCGAG	AACCCTAGCTCAATTCAACC	371	55.1	55.3	PAN1	(TC)10
SSR_34	jcf7180007748992	NC_039902.1	Chr_3c	TCTCCAATTAGCAGTACAAGG	TTAGACAGGGAGAGAGACAG	202	55	55	PAN1	(ATT)8
SSR_35	jcf7180007751476	NC_039900.1	Chr_2c	TGGTTTTCACATCAGACAGA	CCTGGTTCACATGTTCACTT	199	54.5	55.9	PAN3	(AT)12
SSR_36	jcf7180007778688	NC_039918.1	Chr_11c	TGTCCTTCCCACTATCTAGG	ATGTGAAATGTGCTTGCTTC	225	55	55.2	PAN1	(ATG)8
SSR_37	jcf7180007778859	NC_039918.1	Chr_11c	TGTCTCTTAATTCTCCGCTC	ATCACTTTTCTCCACACACA	270	54.6	54.8	PAN2	(AT)16
SSR_38	jcf7180007783504	NC_039913.1	Chr_8c	TCATCAGACGCTTTCACATA	CGTTACCTTTTCTTAGCTGC	246	54.5	54.7	PAN1	(GGT)7
SSR_39	jcf7180007787488	NC_039908.1	Chr_6c	CAAAGAAGCAAGTGTGTTCA	TGAGCGATGTATGTCAGAAG	356	54.7	55	PAN2	(GA)10
SSR_40	jcf7180007791249	NC_039900.1	Chr_2c	TGGACGAACTTGATACTACG	TGTTGAAAATCCCAGTCCAA	300	54.7	55.1	PAN1	(GCG)8
SSR_41	jcf7180007791459	NC_039907.1	Chr_5c	GCCTCTCAAGTCATTAGGTG	AGGGTACTAAGGATGGTCTAA	171	55.6	54.5	PAN2	(TA)12
SSR_42	jcf7180007795753	NC_039910.1	Chr_7c	GAATAAACAGCCCAGTCTCA	AGATACTTCCAATAGCTTGCA	107	55.1	54.7	PAN1	(AG)13
SSR_43	jcf7180007795935	NC_039898.1	Chr_1c	TCTGGGTTTCTATGTGAGGT	ACAGACAAAATGCCAACCTA	337	55.5	55.2	M13	(TC)10
SSR_44	jcf7180007805739	NC_039913.1	Chr_8c	TTAGGTGGTGCTCTCTTTTC	GCGAAGAACCCACAAAATTA	279	55	54.5	M13	(AT)7(AG)13
SSR_45	jcf7180007832196	NC_039919.1	Chr_11e	GTTGAAGTTGTGATTTTGACA	CAGTAACAATGTCTTCCCGT	281	53.2	55.4	PAN1	(TA)16
SSR_46	jcf7180007836687	NC_039900.1	Chr_2c	ATTAGGTTGGATCGGTTGTT	AAGGAAGGAGAGAAATGACG	308	54.6	54.8	PAN3	(AT)21
SSR_47	jcf7180007709660	NC_039913.1	Chr_8c	TGCTGCATTAATCACCTACA	GGCAGAAGAAGATTTGTCCA	157	54.7	55.6	M13	(TCT)7
SSR_48	jcf7180007709888	NC_039900.1	Chr_2c	CCGTGCCTCCTATGATTTAC	CTGACCATGCAATTACTCCT	187	55.7	55.1	M13	(TC)15
SSR_49	jcf7180007713200	NC_039910.1	Chr_7c	AGTGTTGGTGAAGTTTCTCA	GCAACCAAAGATCGTACATG	346	54.7	55.1	PAN1	(AT)11(GT)22
SSR_50	jcf7180007758368	NC_039900.1	Chr_2c	CATTCAGCACACAGTTCTTC	AGTCATCGTTGTGAAATGGA	138	54.9	55	M13	(TC)6TT(TC)13
SSR_51	jcf7180007788307	NC_039900.1	Chr_2c	TTGGTTCAGGTTTTCTAAGC	TGCTACTCTTCTTTGCTACA	198	53.7	54	PAN1	(GT)9(GA)11
SSR_52	jcf7180007789506	NC_039908.1	Chr_6c	TTTTCCGTGAATCCAGATCT	GAGATACAAAGTGAGGAGGC	168	54.4	55.3	PAN1	(CT)18
SSR_53	jcf7180007832341	NC_039912.1	Chr_8e	GAGGCACCTGTTAATATCAGT	CTGTAAGTTCGGAGTGTCAC	125	55.1	55.8	PAN3	(CTT)8
SSR_54	jcf7180007837875	NC_039911.1	Chr_7e	TGCTTTACTGATGAACACCA	GAGGGCTAGTTAGTCGATCT	150	54.9	55.6	PAN2	(TC)16GCTT(TC)5
SSR_55	jcf7180007783435	NC_039918.1	Chr_11c	TTTCAGCATAGGTTCGACAA	AAAGCCTGAATCTCCTCTTG	185	55	55	PAN2	(GA)10
SSR_56	jcf7180007837875	NC_039911.1	Chr_7e	ATGCTTAGTGGGCTTTCTTT	CATGCACCTGAGAGAAGATT	406	55.2	55.1	PAN1	(TC)16
SSR_57	jcf7180007837379	NC_039916.1	Chr_10e	TCAGTAGACACAGTATTGGTC	CAATCGGCAAATCAAGTACC	367	54.4	55.1	PAN3	(TA)14
SSR_58	jcf7180007783134	NC_039908.1	Chr_6c	AAGAAATTCTCCTTGCTCGT	GAGAGCCATTAGATGCAGAA	272	55	54.9	M13	(AT)20
SSR_59	jcf7180007758368	NC_039900.1	Chr_2c	ATTCAGCACACAGTTCTTCT	GTCTATGACGGAGAGAAACC	163	54.9	55	M13	(TC)13
SSR_60	jcf7180007838219	NC_039910.1	Chr_7c	CCCTAGAGACCTTTTCATCC	CGAGTGTCTTCAAGCCATTA	336	54.5	55.5	M13	(TCA)7
SSR_61	jcf7180007826352	NC_039900.1	Chr_2c	ACAAAGCTTCTCCATCTCAG	GGGTGACTTTCCTGCTAATT	413	55.1	55.3	PAN3	(TC)13
SSR_62	jcf7180007780415	NC_039915.1	Chr_9e	AGTTCAGTGGTGGAGTAAAG	TCGAAGAAGAAGAGCAAGAG	157	54.6	54.9	PAN2	(TA)15
SSR_63	jcf7180007830845	NC_039919.1	Chr_11e	ATAGGATGAAGCTAGGGACC	CTCGGTATTGGTTTCATTGC	230	55.5	55.1	PAN3	(AT)10
SSR_64	jcf7180007832341	NC_039912.1	Chr_8e	GGCACCTGTTAATATCAGTG	GATGGATGTAGAGGATGGTG	206	53.8	54.7	M13	(CTT)8
SSR_65	jcf7180007836976	NC_039903.1	Chr_3e	ACTGGACAAAGTATTCTCGG	GTGTTCAATGGCAAGTCAAA	394	54.8	55	PAN2	(TC)10
SSR_66	jcf7180007709888	NC_039900.1	Chr_2c	CGTGCCTCCTATGATTTACT	ATTACTCCTTGCTCTCCTCT	175	54.7	54.9	PAN1	(TC)15
SSR_67	jcf7180007740372	NC_039918.1	Chr_11c	TACTAATTCGTCGTTTGGCT	CTTTTAGGTCATTTGGTCCAA	115	54.8	54	PAN1	(CA)11
SSR_68	jcf7180007778809	NC_039901.1	Chr_2e	TAGGTTGGATCGGTTGTTG	TCCAATCAACTTATAGCCTCA	197	54.8	54	PAN3	(AT)10
SSR_69	jcf7180007789824	NC_039916.1	Chr_10e	GTGAATCATTAGAGATGCCTG	CACCATCCTTGTCACATTTT	146	54.2	54.1	M13	(AT)13
SSR_70	jcf7180007789824	NC_039916.1	Chr_10e	TATTGAGGTTTGGCTTTCGA	CATTAACACCCCTCTTGTCA	345	55	55	PAN1	(GA)12
SSR_71	jcf7180007778669	NC_039916.1	Chr_10e	CCTCTTCCGTTCTTCATCTT	CTTCAATCACCAAAACCTCC	317	54.8	54.5	PAN2	(CT)14
SSR_72	jcf7180007804000	NC_039901.1	Chr_2e	GTACCAATTTGAAAGGGCTC	ACCAACCAACTAGAAAACGA	255	54.6	54.8	PAN1	(TA)11
SSR_73	jcf7180007814923	NC_039901.1	Chr_2e	GACACAAGAAGTTAGGCAAA	TTTTATAACCCAGGAATCGGT	400	53.8	54.6	PAN3	(AT)12
SSR_74	jcf7180007836927	NC_039898.1	Chr_1c	GACGGATGCTCTTAATTCCT	GTGTACAGATCCCTACTTCC	253	54.9	54.3	M13	(AG)13
SSR_75	jcf7180007791812	NC_039905.1	Chr_4e	TGTAGAGCCCCTATATCCTG	CCTGTGTTTTCATTTGCTGT	324	54.9	55	PAN3	(CTT)10
SSR_76	jcf7180007795753	NC_039910.1	Chr_7c	AATAAACAGCCCAGTCTCAA	TTCTTCAATTTGCAGCCTTT	272	54.5	54.2	PAN3	(AG)13
SSR_77	jcf7180007710390	NC_039911.1	Chr_7e	AATCAAGTGGTAATTGGGAGT	TTGTGGTCCTCGTTTTAGTT	388	54.8	54.8	PAN1	(AT)10
SSR_78	jcf7180007831443	NC_039900.1	Chr_2c	TAATTCTCTCACCCGACAAC	TAGAAGAAGGAAAAGGGAGC	347	54.8	54.4	PAN2	(CTC)7
SSR_79	jcf7180007791856	NC_039905.1	Chr_4e	AGGCCTTGTTGATAGCTTTG	ACTTAGGAAAAGGGTGGTTG	384	56	55.1	M13	(AAT)9
SSR_80	jcf7180007780167	NC_039899.1	Chr_1e	CTTTGGATTTGAAAGCGGAA	CAAAGGTATGTCTCTGGGTC	421	54.8	55.2	PAN2	(GA)10
SSR_81	jcf7180007832953	NC_039898.1	Chr_1c	GTGAGTCTCCTGTCATCATC	GAAAATGTTCCCATCAGACA	418	55	53.5	M13	(AT)24
SSR_82	jcf7180007781690	NC_039912.1	Chr_8e	AAGCTTCGGATTGTTGTCAT	AGTCCTAGTTCGCTGTAGTA	220	55.6	54.7	PAN2	(TA)11
SSR_83	jcf7180007708458	NC_039905.1	Chr_4e	AACTATCTACCTTGCCTTGC	AGATTGGAAAGAGTTGCTGT	285	55.1	54.9	PAN1	(AAT)7
SSR_84	jcf7180007831940	NC_039900.1	Chr_2c	ACTGCCAAATCTACCATTGA	CCTTGGTCATTCATCGTCAA	293	54.6	55.8	PAN2	(ATA)16
SSR_85	jcf7180007792942	NC_039904.1	Chr_4c	TAAACTGGTTGTGATCTGCA	AGTACTTAGAATGTAGTGGCT	208	54.9	53.4	PAN1	(TG)10
SSR_86	jcf7180007782246	NC_039910.1	Chr_7c	GCTATTAGTTCCTGTGCGAA	CTATTGCGTGTACTTCCTCA	312	55.6	54.9	PAN1	(GT)10
SSR_87	jcf7180007752702	NC_039899.1	Chr_1e	TCCACCATAGCCCTATTACT	ACTCTAGGAAAGTTCAGTGG	301	54.7	54	PAN3	(TC)12(TA)17
SSR_88	jcf7180007761807	NC_039900.1	Chr_2c	ATCAAGAATCACACTCACCC	ACTAAGAAGAGAAGCCCAAC	419	55	54.7	PAN1	(TC)12AAAAACAACC(TA)13
SSR_89	jcf7180007719129	NC_039909.1	Chr_6e	AAACTGGGACCATACACATC	TTGACGTAACTGTTTGACCA	424	55	55.2	PAN3	(ACA)7
SSR_90	jcf7180007832549	NC_039904.1	Chr_4c	AACCACTCGCTCCTATATCA	TCTTGCTTTTCCCTTTTCCA	158	55.4	55.3	PAN3	(AAT)8
SSR_91	jcf7180007713571	NC_039916.1	Chr_10e	AGACTATGCTCACTCCAGAA	TACCCATTCCTTGCACTTAG	269	55.3	54.7	PAN2	(AAT)11
SSR_92	jcf7180007786935	NC_039898.1	Chr_1c	TTCGAAATATCCCAAATGAGG	CTTATTGTCCAGGTCTGCTT	131	53.7	55	PAN2	(CA)10
SSR_93	jcf7180007710799	NC_039904.1	Chr_4c	AAGATGAGAAGGAAGCAAAAT	GAAAAGCCCTCAGACATTTG	150	53.4	54.9	PAN1	(TA)13
SSR_94	jcf7180007750472	NC_039917.1	Chr_10c	GATGGCGTTTTCTTGTCTTT	CGAAGCACACAATATAACAGA	92	54.8	54.1	M13	(CA)15
SSR_95	jcf7180007789506	NC_039908.1	Chr_6c	ATTTTCCGTGAATCCAGATCT	TGAGAAGGGGTTGTTGTTG	139	55	55.2	PAN3	(CT)18
SSR_96	jcf7180007713200	NC_039910.1	Chr_7c	TGATCTCCTTGCCAATCATG	CCAAAGATCGTACATGACCA	307	55.5	55.2	M13	(AT)11(GT)22
SSR_97	jcf7180007756734	NC_039909.1	Chr_6e	AAGGTAAGGCACATGGATTT	TTTTGTTCCTCGCTAGTTCA	428	54.9	54.9	M13	(TAT)7
SSR_98	jcf7180007795935	NC_039899.1	Chr_1e	TCTTGTTCAGTATTGCTCCG	AGTAACTTGGAGTGCTGATG	446	55.5	55.1	PAN1	(TC)10
SSR_99	jcf7180007788307	NC_039900.1	Chr_2c	TTCCTTCTCCAATTTCACCC	CCAGGAGTTAATGTCAACCA	411	55.2	55	PAN2	(GA)11
SSR_100	jcf7180007834415	NC_039906.1	Chr_5e	TAGTTCTCGTTCGTTTGCTT	GCTCCTCATTTTGGACAGAT	401	55.4	55.4	M13	(AT)11
