# Supplementary material for: First Genomic Insights Into The <em>Mandevilla</em> Genus
Source: Preprints.org preprint supplement (doi:10.20944/preprints202204.0255.v1), 2022-04-27
Supplement: Supplementary file 1 [file supplementary › Table S5.xlsx]

## Sheet: Table S5
Table S5. Genetic similarity matrix based on 23 SSR. In the first column the observed heterozygosis is indicated too
		Ho	Sample	2031	2055	2049	2013	2014	2051	2053	2050	2052	2054	2012	2001	2002	2003	2004	2005	2006	2007	2008	2009	2010	2011	2015	2016	2017	2018	2019	2020	2021	2022	2023	2024	2025	2026	2027	2028	2029	2030	2033	2034	2035	2036	2037	2038	2039	2040
		0.4091	2031	1
		0.3478	2055	0.672131	1
		0.3043	2049	0.721311	0.595238	1
		0.3043	2013	0.754098	0.642857	0.698413	1
		0.4091	2014	0.588235	0.674797	0.577236	0.569106	1
		0.3636	2051	0.621849	0.747967	0.601626	0.658537	0.747967	1
		0.4545	2053	0.621849	0.747967	0.601626	0.658537	0.747967	1	1
		0.3913	2050	0.581967	0.769841	0.603175	0.587302	0.780488	0.772358	0.772358	1
		0.3478	2052	0.557377	0.809524	0.547619	0.563492	0.788618	0.845528	0.845528	0.880952	1
		0.3913	2054	0.565574	0.722222	0.587302	0.587302	0.813008	0.788618	0.788618	0.84127	0.833333	1
		0.55	2012	0.787611	0.637168	0.80531	0.672566	0.645455	0.6	0.6	0.646018	0.584071	0.637168	1
		0.3043	2001	0.54918	0.674603	0.571429	0.587302	0.780488	0.804878	0.804878	0.809524	0.785714	0.888889	0.59292	1
		0.3043	2002	0.54918	0.674603	0.571429	0.587302	0.780488	0.804878	0.804878	0.809524	0.785714	0.888889	0.59292	1	1
		0.2727	2003	0.564103	0.68595	0.578512	0.61157	0.771186	0.805085	0.805085	0.809917	0.768595	0.876033	0.584071	0.991736	0.991736	1
		0.6154	2004	0.681818	0.671429	0.714286	0.657143	0.80597	0.731343	0.731343	0.828571	0.771429	0.828571	0.66129	0.8	0.8	0.8	1
		0.5714	2005	0.692308	0.637681	0.652174	0.637681	0.772727	0.681818	0.681818	0.768116	0.73913	0.782609	0.622951	0.768116	0.768116	0.768116	0.981132	1
		0.375	2006	0.567901	0.658824	0.623529	0.588235	0.788235	0.717647	0.717647	0.811765	0.8	0.823529	0.623377	0.823529	0.823529	0.811765	0.886792	0.901639	1
		0.2632	2007	0.679612	0.803738	0.598131	0.654206	0.673077	0.788462	0.788462	0.775701	0.803738	0.728972	0.585859	0.766355	0.766355	0.775701	0.8	0.765625	0.788235	1
		0.3529	2008	0.577778	0.680851	0.617021	0.617021	0.78022	0.813187	0.813187	0.861702	0.787234	0.882979	0.593023	1	1	0.989362	0.884615	0.816667	0.839506	0.797872	1
		0.3636	2009	0.837607	0.661157	0.719008	0.752066	0.550847	0.635593	0.635593	0.595041	0.553719	0.553719	0.787037	0.578512	0.578512	0.594828	0.646154	0.640625	0.6125	0.72549	0.617978	1
		0.4091	2010	0.697479	0.837398	0.658537	0.699187	0.658537	0.780488	0.780488	0.764228	0.756098	0.747967	0.645455	0.747967	0.747967	0.762712	0.791045	0.757576	0.788235	0.884615	0.791209	0.737288	1
		0.625	2011	0.58427	0.688172	0.634409	0.623656	0.817204	0.774194	0.774194	0.860215	0.817204	0.827957	0.611765	0.903226	0.903226	0.892473	0.87931	0.9	0.851351	0.763441	0.892857	0.602273	0.731183	1
		0.25	2015	0.581395	0.677778	0.622222	0.588889	0.788889	0.755556	0.755556	0.733333	0.722222	0.777778	0.695122	0.7	0.7	0.688889	0.689655	0.649123	0.703704	0.577778	0.691358	0.564706	0.622222	0.746988	1
		0.3043	2016	0.516393	0.65873	0.539683	0.52381	0.715447	0.626016	0.626016	0.698413	0.690476	0.793651	0.566372	0.746032	0.746032	0.743802	0.742857	0.73913	0.717647	0.626168	0.734043	0.512397	0.634146	0.72043	0.733333	1
		0.5909	2017	0.560345	0.7	0.583333	0.583333	0.726496	0.74359	0.74359	0.825	0.808333	0.85	0.598131	0.833333	0.833333	0.834783	0.814286	0.782609	0.764706	0.719626	0.851064	0.53913	0.683761	0.88172	0.766667	0.808333	1
		0.3043	2018	0.614754	0.626984	0.619048	0.619048	0.731707	0.707317	0.707317	0.68254	0.706349	0.68254	0.610619	0.650794	0.650794	0.644628	0.8	0.710145	0.729412	0.71028	0.680851	0.644628	0.666667	0.774194	0.744444	0.650794	0.675	1
		0.2609	2019	0.688525	0.666667	0.65873	0.65873	0.609756	0.666667	0.666667	0.595238	0.619048	0.626984	0.637168	0.611111	0.611111	0.603306	0.657143	0.594203	0.611765	0.691589	0.617021	0.710744	0.658537	0.645161	0.7	0.674603	0.625	0.769841	1
		0.1818	2020	0.672269	0.747967	0.650407	0.642276	0.666667	0.739837	0.739837	0.739837	0.731707	0.723577	0.618182	0.756098	0.756098	0.771186	0.820896	0.727273	0.705882	0.865385	0.791209	0.694915	0.845528	0.763441	0.588889	0.642276	0.726496	0.691057	0.715447	1
		0.1818	2021	0.713115	0.778689	0.598361	0.647541	0.689076	0.773109	0.773109	0.754098	0.762295	0.737705	0.637168	0.721311	0.721311	0.735043	0.69697	0.707692	0.679012	0.776699	0.733333	0.709402	0.781513	0.696629	0.686047	0.655738	0.706897	0.655738	0.713115	0.823529	1
		0.4783	2022	0.696721	0.642857	0.793651	0.777778	0.617886	0.707317	0.707317	0.619048	0.579365	0.587302	0.725664	0.650794	0.650794	0.661157	0.685714	0.637681	0.635294	0.682243	0.691489	0.785124	0.715447	0.677419	0.633333	0.571429	0.583333	0.68254	0.722222	0.658537	0.655738	1
		0.3333	2023	0.786325	0.700855	0.803419	0.735043	0.596491	0.675439	0.675439	0.615385	0.57265	0.538462	0.805556	0.564103	0.564103	0.589286	0.639344	0.6	0.592105	0.734694	0.623529	0.863248	0.745614	0.607143	0.62963	0.512821	0.558559	0.683761	0.752137	0.754386	0.726496	0.846154	1
		0.5238	2024	0.735043	0.632479	0.837607	0.717949	0.614035	0.675439	0.675439	0.615385	0.57265	0.555556	0.824074	0.581197	0.581197	0.589286	0.639344	0.566667	0.565789	0.642857	0.611765	0.777778	0.675439	0.607143	0.654321	0.547009	0.567568	0.666667	0.700855	0.666667	0.675214	0.880342	0.880342	1
		0.3636	2025	0.594828	0.783333	0.566667	0.575	0.769231	0.803419	0.803419	0.85	0.816667	0.9	0.616822	0.833333	0.833333	0.817391	0.765625	0.650794	0.708861	0.742574	0.818182	0.573913	0.760684	0.781609	0.72619	0.708333	0.807018	0.675	0.633333	0.717949	0.698276	0.591667	0.558559	0.558559	1
		0.5	2026	0.603448	0.758333	0.608333	0.65	0.74359	0.863248	0.863248	0.775	0.808333	0.825	0.607477	0.825	0.825	0.826087	0.8125	0.746032	0.78481	0.792079	0.852273	0.626087	0.837607	0.83908	0.678571	0.666667	0.763158	0.716667	0.658333	0.760684	0.689655	0.7	0.648649	0.648649	0.858333	1
		0.381	2027	0.579832	0.764706	0.605042	0.613445	0.756303	0.806723	0.806723	0.840336	0.831933	0.806723	0.663636	0.789916	0.789916	0.77193	0.761905	0.709677	0.716049	0.74	0.804598	0.596491	0.764706	0.808989	0.744186	0.689076	0.761062	0.689076	0.596639	0.739496	0.731092	0.672269	0.614035	0.649123	0.823009	0.761062	1
		0.5	2028	0.613445	0.723577	0.609756	0.601626	0.772358	0.780488	0.780488	0.796748	0.772358	0.878049	0.627273	0.861789	0.861789	0.847458	0.850746	0.757576	0.788235	0.740385	0.879121	0.59322	0.788618	0.83871	0.744444	0.747967	0.803419	0.764228	0.642276	0.747967	0.680672	0.650407	0.596491	0.596491	0.905983	0.846154	0.815126	1
		0.5	2029	0.613445	0.739837	0.609756	0.601626	0.788618	0.780488	0.780488	0.813008	0.788618	0.894309	0.627273	0.861789	0.861789	0.847458	0.850746	0.757576	0.788235	0.740385	0.879121	0.59322	0.788618	0.83871	0.744444	0.764228	0.820513	0.764228	0.642276	0.747967	0.680672	0.650407	0.596491	0.596491	0.923077	0.846154	0.815126	0.98374	1
		0.5217	2030	0.680328	0.920635	0.642857	0.642857	0.723577	0.780488	0.780488	0.801587	0.809524	0.769841	0.699115	0.722222	0.722222	0.735537	0.771429	0.710145	0.741176	0.82243	0.734043	0.661157	0.821138	0.774194	0.722222	0.690476	0.75	0.690476	0.666667	0.747967	0.770492	0.65873	0.709402	0.675214	0.825	0.8	0.789916	0.772358	0.788618	1
		0.2727	2033	0.680328	0.762295	0.663934	0.647541	0.680672	0.747899	0.747899	0.737705	0.729508	0.754098	0.707965	0.721311	0.721311	0.717949	0.757576	0.661538	0.691358	0.747573	0.744444	0.65812	0.789916	0.685393	0.651163	0.672131	0.689655	0.672131	0.631148	0.697479	0.688525	0.704918	0.726496	0.726496	0.75	0.741379	0.722689	0.773109	0.773109	0.786885	1
		0.2727	2034	0.680328	0.762295	0.663934	0.647541	0.680672	0.747899	0.747899	0.737705	0.729508	0.754098	0.707965	0.721311	0.721311	0.717949	0.757576	0.661538	0.691358	0.747573	0.744444	0.65812	0.789916	0.685393	0.651163	0.672131	0.689655	0.672131	0.631148	0.697479	0.688525	0.704918	0.726496	0.726496	0.75	0.741379	0.722689	0.773109	0.773109	0.786885	1	1
		0.6471	2035	0.597701	0.791209	0.571429	0.615385	0.727273	0.693182	0.693182	0.791209	0.813187	0.857143	0.590361	0.769231	0.769231	0.758242	0.714286	0.719298	0.705128	0.736264	0.770115	0.55814	0.738636	0.77381	0.702703	0.78022	0.846154	0.659341	0.593407	0.659091	0.701149	0.604396	0.536585	0.560976	0.835294	0.729412	0.821429	0.795455	0.818182	0.802198	0.770115	0.770115	1
		0.3913	2036	0.639344	0.801587	0.619048	0.68254	0.699187	0.756098	0.756098	0.793651	0.785714	0.809524	0.681416	0.761905	0.761905	0.760331	0.7	0.681159	0.705882	0.719626	0.776596	0.628099	0.780488	0.741935	0.7	0.698413	0.791667	0.619048	0.642857	0.691057	0.778689	0.714286	0.675214	0.675214	0.758333	0.75	0.798319	0.731707	0.747967	0.801587	0.811475	0.811475	0.868132	1
		0.6	2037	0.589286	0.758929	0.607143	0.625	0.798165	0.807339	0.807339	0.875	0.857143	0.910714	0.669903	0.875	0.875	0.859813	0.818182	0.781818	0.788732	0.752688	0.875	0.598131	0.770642	0.872093	0.776316	0.75	0.849057	0.714286	0.580357	0.743119	0.758929	0.633929	0.579439	0.598131	0.877358	0.792453	0.899083	0.880734	0.880734	0.803571	0.785714	0.785714	0.833333	0.821429	1
		0.3333	2038	0.681034	0.758621	0.663793	0.655172	0.681416	0.743363	0.743363	0.724138	0.724138	0.758621	0.719626	0.724138	0.724138	0.720721	0.766667	0.661017	0.693333	0.762887	0.75	0.666667	0.80531	0.686747	0.65	0.681034	0.690909	0.663793	0.637931	0.707965	0.681034	0.698276	0.720721	0.720721	0.758621	0.75	0.734513	0.778761	0.778761	0.793103	0.991379	0.991379	0.790123	0.810345	0.792453	1
		0.4783	2039	0.598361	0.722222	0.587302	0.603175	0.731707	0.788618	0.788618	0.793651	0.785714	0.761905	0.672566	0.793651	0.793651	0.793388	0.671429	0.637681	0.682353	0.747664	0.808511	0.603306	0.747967	0.752688	0.677778	0.666667	0.758333	0.619048	0.579365	0.691057	0.754098	0.698413	0.675214	0.709402	0.741667	0.766667	0.823529	0.731707	0.731707	0.753968	0.819672	0.819672	0.769231	0.873016	0.848214	0.818966	1
		0.4762	2040	0.566372	0.666667	0.57265	0.623932	0.794872	0.82906	0.82906	0.786325	0.803419	0.837607	0.634615	0.888889	0.888889	0.875	0.737705	0.65	0.746835	0.734694	0.882353	0.598214	0.717949	0.816092	0.690476	0.726496	0.774775	0.641026	0.615385	0.709402	0.699115	0.675214	0.574074	0.611111	0.803419	0.777778	0.858407	0.794872	0.794872	0.709402	0.725664	0.725664	0.768293	0.777778	0.883495	0.734513	0.811966	1
		0.5652	2041	0.598361	0.690476	0.603175	0.619048	0.731707	0.772358	0.772358	0.84127	0.81746	0.793651	0.637168	0.793651	0.793651	0.77686	0.757143	0.768116	0.764706	0.766355	0.808511	0.628099	0.764228	0.806452	0.644444	0.730159	0.791667	0.698413	0.611111	0.707317	0.721311	0.68254	0.632479	0.649573	0.775	0.733333	0.823529	0.796748	0.796748	0.722222	0.836066	0.836066	0.802198	0.825397	0.875	0.836207	0.873016	0.794872
		0.5217	2042	0.622951	0.68254	0.626984	0.642857	0.756098	0.780488	0.780488	0.833333	0.777778	0.785714	0.663717	0.753968	0.753968	0.735537	0.771429	0.710145	0.741176	0.757009	0.755319	0.644628	0.739837	0.774194	0.666667	0.706349	0.75	0.738095	0.634921	0.715447	0.729508	0.690476	0.666667	0.683761	0.8	0.741667	0.798319	0.788618	0.788618	0.730159	0.811475	0.811475	0.725275	0.753968	0.848214	0.810345	0.81746	0.769231
		0.4348	2043	0.614754	0.730159	0.611111	0.642857	0.723577	0.764228	0.764228	0.801587	0.809524	0.801587	0.654867	0.722222	0.722222	0.702479	0.757143	0.73913	0.729412	0.728972	0.723404	0.628099	0.739837	0.698925	0.677778	0.722222	0.75	0.674603	0.634921	0.682927	0.786885	0.674603	0.641026	0.65812	0.75	0.691667	0.806723	0.739837	0.756098	0.746032	0.803279	0.803279	0.824176	0.880952	0.839286	0.801724	0.849206	0.752137
		0.3043	2044	0.647541	0.674603	0.650794	0.619048	0.699187	0.723577	0.723577	0.761905	0.690476	0.809524	0.654867	0.777778	0.777778	0.77686	0.742857	0.710145	0.741176	0.719626	0.797872	0.61157	0.764228	0.784946	0.711111	0.730159	0.783333	0.650794	0.626984	0.723577	0.672131	0.68254	0.666667	0.666667	0.783333	0.775	0.705882	0.829268	0.829268	0.722222	0.803279	0.803279	0.758242	0.761905	0.767857	0.810345	0.761905	0.700855
		0.3478	2045	0.639344	0.825397	0.595238	0.595238	0.739837	0.764228	0.764228	0.753968	0.777778	0.81746	0.672566	0.753968	0.753968	0.743802	0.714286	0.652174	0.694118	0.757009	0.755319	0.61157	0.756098	0.763441	0.755556	0.738095	0.791667	0.642857	0.619048	0.715447	0.729508	0.626984	0.649573	0.649573	0.816667	0.775	0.781513	0.772358	0.788618	0.84127	0.844262	0.844262	0.868132	0.801587	0.830357	0.862069	0.801587	0.735043
		0.3333	2046	0.575221	0.760684	0.581197	0.649573	0.769231	0.854701	0.854701	0.846154	0.863248	0.794872	0.615385	0.811966	0.811966	0.794643	0.754098	0.633333	0.670886	0.734694	0.811765	0.607143	0.74359	0.827586	0.690476	0.649573	0.801802	0.735043	0.641026	0.752137	0.690265	0.666667	0.62037	0.62037	0.846154	0.837607	0.867257	0.820513	0.820513	0.769231	0.752212	0.752212	0.756098	0.786325	0.883495	0.743363	0.803419	0.837607
		0.4091	2047	0.647059	0.804878	0.723577	0.634146	0.642276	0.699187	0.699187	0.715447	0.691057	0.715447	0.745455	0.666667	0.666667	0.661017	0.641791	0.590909	0.564706	0.673077	0.681319	0.652542	0.707317	0.709677	0.677778	0.634146	0.717949	0.601626	0.674797	0.731707	0.731092	0.682927	0.780702	0.72807	0.717949	0.692308	0.764706	0.691057	0.691057	0.788618	0.722689	0.722689	0.715909	0.796748	0.761468	0.725664	0.731707	0.675214
		0.25	2048	0.676768	0.757282	0.563107	0.669903	0.65	0.76	0.76	0.708738	0.718447	0.718447	0.611111	0.660194	0.660194	0.673469	0.703125	0.660714	0.652778	0.75	0.676056	0.693878	0.77	0.662338	0.675325	0.669903	0.680412	0.650485	0.679612	0.76	0.848485	0.640777	0.702128	0.638298	0.699029	0.699029	0.708333	0.71	0.71	0.728155	0.707071	0.707071	0.733333	0.757282	0.729167	0.717172	0.728155	0.65
		0.3636	2032	0.907563	0.666667	0.682927	0.707317	0.585366	0.609756	0.609756	0.609756	0.552846	0.593496	0.709091	0.560976	0.560976	0.584746	0.686567	0.681818	0.541176	0.644231	0.604396	0.771186	0.682927	0.623656	0.633333	0.544715	0.606838	0.626016	0.666667	0.674797	0.705882	0.658537	0.798246	0.710526	0.606838	0.615385	0.571429	0.634146	0.634146	0.666667	0.697479	0.697479	0.625	0.642276	0.623853	0.699115	0.593496	0.529915
[truncated: 9 more columns]
