# Supplementary material for: First Genomic Insights Into The <em>Mandevilla</em> Genus
Source: Preprints.org preprint supplement (doi:10.20944/preprints202204.0255.v1), 2022-04-27
Supplement: Supplementary file 1 [file supplementary › Table S6.xlsx]

## Sheet: Table S6
Table S6. Cytometric analysis results for 55 Mandevilla accessions analyzed using 2001 sample as reference
Sample (colors indicate the DNA barcoding cluster at which each sample belongs)	% of Vis	Mean	GeoMean	Median fluorescence Intensity (MFI)	CV	MFIs/MFI2001	UPGMA-based SSR							SSR-based cluster	mean MFI
2016	58.6619	4736.6	4726.33	4749	6.55873	0.853216	Brown							brown	0.694754
2015	73.0144	2976.55	2967.12	2985	7.88708	0.536292	Brown							blue	0.961373
2047	55.9053	5337.57	5330.96	5351	4.94496	0.961373	blue							ocher	0.770898
2009	76.2255	2733.69	2722.04	2749	9.13703	0.493891	ocher			Barcoding cluster 1				grey	0.949335
2012	74.53	3375.68	3364.69	3421	8.32	0.614625	ocher			Barcoding cluster 2				green	0.94248
2022	66.4296	3949.02	3940.94	3987	6.26097	0.716313	ocher							violet	0.990353
2032	70.2473	4039.63	4028.23	4061	7.44869	0.729608	ocher
2018	61.3556	4194.19	4180.98	4193	7.8585	0.753324	ocher
2019	63.6644	4514.01	4503.96	4544	6.60071	0.816385	ocher
2024	59.8958	4672.25	4665.63	4694	5.28746	0.843335	ocher
2013	50.5015	4801.15	4795.43	4818	4.85486	0.865613	ocher
2023	41.6189	4813.79	4808.3	4832	4.74284	0.868128	ocher
2049	56.0587	4906.62	4901.21	4937	4.6213	0.886992	ocher
2031	50.9025	4940.8	4934.34	4963	5.08243	0.891664	ocher
2020	59.2319	4964.09	4957.23	4982	5.21917	0.895077	grey
2048	60.3025	5058.96	5050.49	5091	5.729	0.91466	grey
2007	62.1132	5562.65	5557.09	5575	4.43277	1.00162	grey
2021	62.5858	5010.75	5003.91	5038	5.16316	0.905138	grey
2010	51.6888	5727.61	5722.9	5734	4.04744	1.03018	grey
2043	57.0273	6039.76	6035.63	6064	3.66195	1.08947	green
2030	44.962	5771.72	5764.74	5821	4.84	1.04581	green
2055	55.329	5808.41	5802.69	5825	4.40911	1.04653	green
2045	58.0975	5833.18	5828.47	5850	3.9889	1.05102	green
2038	71.1587	3870.3	3857.94	3889	7.88566	0.698706	green
2042	68.8686	4358.55	4345.72	4395	7.58881	0.789616	green
2044	64.2795	5118.95	5112.75	5122	4.91423	0.92023	green
2034	68.0318	3831.41	3820.22	3871	7.52846	0.695473	green
2036	68.9909	4217.79	4208.71	4239	6.4887	0.761588	green
2033	30.5671	5645.48	5638.81	5683	4.80519	1.02102	green
2041	56.5565	5655.52	5650.09	5668	4.36182	1.01833	green
2039	53.0557	5794.66	5789.67	5816	4.11387	1.04492	green
2035	45.2623	5941.63	5937.39	5953	3.76066	1.06953	green
2040	74.0767	4234.38	4224.05	4254	6.87557	0.764283	violet
2004	61.2421	5530.91	5525.25	5528	4.52967	0.993173	violet
2002	61.7949	5849.89	5845.23	5864	3.96203	1.05354	violet
2003	67.8117	6362.1	6358.6	6381	3.28966	1.14642	violet
2011	60.63	4829.55	4823.25	4852	5.05656	0.871721	violet
2037	44.4777	6161.78	6155.18	6188	4.5723	1.11175	violet
2050	62.6995	4954.08	4938.32	4963	7.93746	0.891664	violet
2025	57.1832	5717.87	5707	5776	6.07258	1.03773	violet
2053	46.3333	6069.26	6061.21	6126	5.05929	1.10061	violet
2046	56.4154	5329.31	5321.98	5349	5.19025	0.961013	violet
2028	61.7577	5409.94	5403.89	5400	4.72095	0.970176	violet
2051	46.7036	5943.85	5936.67	5951	4.90285	1.06917	violet
2006	53.5398	5523.38	5517.38	5537	4.62566	0.99479	violet
2008	59.9582	5892.06	5886.66	5909	4.24424	1.06162	violet
2005	63.2348	5243.37	5237.56	5257	4.67419	0.944484	violet
2027	60.1171	5554.11	5548.38	5565	4.51208	0.99982	violet
2052	51.7778	5760.21	5754.92	5790	4.24432	1.04024	violet
2014	49.0223	5459.06	5453.54	5464	4.48087	0.981674	violet
2026	49.0914	5410.17	5401.94	5424	5.47988	0.974488	violet
2017	64.969	4292.27	4283.18	4315	6.44163	0.775243	violet
2029	52.6947	5512.04	5505.54	5519	4.83257	0.991556	violet
2001	62.0066	5558.98	5552.5	5566	4.80241	1	violet
2054	48.1579	5797.85	5791.82	5805	4.54338	1.04294	violet
