# Supplementary material for: First Genomic Insights Into The <em>Mandevilla</em> Genus
Source: Preprints.org preprint supplement (doi:10.20944/preprints202204.0255.v1), 2022-04-27
Supplement: Supplementary file 1 [file supplementary › Table S7.xlsx]

## Sheet: Table S7
Table S7. ITS1-based haplotypes reconstructed for the 55 Mandevilla accessions. Samples are organized in two subgroups based on the rbcL sequence alingment: pink samples shared a "C" in position 575, blue samples shared a "A" in the same position. Predicted parental genotypes for each polymorphic positions are reported. Parental genotypes discriminating the two samples groups are highlighted in r…
	ITS1															rbcL		Best hit (blastN) for ITS sequence	Similarity (%)	Query coverage
Polymorphic positions	31	35	78	88	100	114	115	117	130	163	200	203	207	210	223	575
Parental genotypes	CT x CC	AT x TT	CT x TT	CT x CT	TT x CT	AG x GG	TT x TG	GC x GC	AC x AC	CT x CC	CT x CC	CT x TT	AA x AG	AG x AA	TC x TT
2032	C	T	T	T	T	G	T	C	C	C	C	T	A	A	T	C		KY483907.1 (Mandevilla atroviolacea)	96,753	1
2031	C	T	T	T	T	G	T	C	C	C	C	T	A	A	T			KY483907.1 (Mandevilla atroviolacea)	96,753	1
2022	C	T	T	Y	Y	G	K	G	M	C	C	T	R	A	T			KY483907.1 (Mandevilla atroviolacea)	97,78	1
2013	C	T	Y	T	T	G	T	G	C	C	C	T	A	R	Y			KY483907.1 (Mandevilla atroviolacea)	96,104	1
2009	C	T	Y	T	T	G	T	S	C	C	C	T	A	R	Y			KY483907.1 (Mandevilla atroviolacea)	95,779	1
2055	C	T	Y	T	T	G	T	S	C	C	C	T	A	R	Y			KY483907.1 (Mandevilla atroviolacea)	95,779	1
2020	C	T	Y	Y	Y	R	K	G	M	Y	C	T	R	R	Y			KY483907.1 (Mandevilla atroviolacea)	95,455	1
2018	C	W	T	C	Y	R	K	G	A	Y	C	T	R	A	T			KY483907.1 (Mandevilla atroviolacea)	96,753	1
2028	C	W	T	C	Y	R	K	G	A	Y	Y	T	R	A	T			KY483907.1 (Mandevilla atroviolacea)	96,429	1
2012	Y	T	T	T	T	G	T	C	C	C	C	T	A	R	T			KY483907.1 (Mandevilla atroviolacea)	96,104	1
2024	Y	T	T	T	T	G	T	S	C	C	C	T	A	R	T			KY483907.1 (Mandevilla atroviolacea)	96,104	1
2033	Y	T	T	Y	Y	G	K	S	M	C	C	Y	R	R	T			KY483907.1 (Mandevilla atroviolacea)	95,779	1
2049	Y	T	T	Y	Y	R	K	S	M	C	C	T	R	R	T			KY483907.1 (Mandevilla atroviolacea)	95,779	1
2010	Y	T	T	Y	Y	R	K	S	M	Y	C	T	R	R	T			KY483907.1 (Mandevilla atroviolacea)	95,455	1
2021	Y	T	T	Y	Y	R	K	S	M	Y	C	T	R	R	T			KY483907.1 (Mandevilla atroviolacea)	95,455	1
2026	Y	T	T	Y	Y	R	K	S	M	Y	C	T	R	R	T			KY483907.1 (Mandevilla atroviolacea)	95,455	1
2047	Y	T	T	Y	Y	R	K	S	M	Y	C	T	R	R	T			KY483907.1 (Mandevilla atroviolacea)	95,455	1
2053	Y	T	T	Y	Y	R	K	S	M	Y	C	T	R	R	T			KY483907.1 (Mandevilla atroviolacea)	95,455	1
2052	Y	T	T	Y	Y	R	K	S	M	Y	C	T	R	R	T			KY483907.1 (Mandevilla atroviolacea)	95,455	1
2050	Y	T	T	Y	Y	R	K	S	M	Y	C	T	R	R	T			KY483907.1 (Mandevilla atroviolacea)	95,455	1
2023	Y	T	Y	T	T	G	T	S	C	C	C	T	A	G	Y			KY483907.1 (Mandevilla atroviolacea)	95,455	1
2019	Y	W	T	Y	T	G	T	S	M	C	C	T	A	R	T			KY483907.1 (Mandevilla atroviolacea)	95,779	1
2007	Y	W	T	Y	Y	G	K	S	M	C	Y	T	R	R	T			KY483907.1 (Mandevilla atroviolacea)	95,455	1
2046	Y	W	T	Y	Y	G	K	S	M	C	Y	T	R	R	T			KY483907.1 (Mandevilla atroviolacea)	95,455	1
2051	Y	W	T	Y	Y	G	K	S	M	C	Y	T	R	R	T			KY483907.1 (Mandevilla atroviolacea)	95,455	1
Parental genotypes	CT x CC	AT x TT	TT x TT	CC x CT	CC x CT	AG x GG	GG x TG	GG x GC	AA x AC	CT x CC	CT x CC	CT x TT	GG x AG	AG x AA	TT x TT
2040	C	T	T	C	C	R	G	G	A	Y	C	Y	G	A	T	A		KY483907.1 (Mandevilla atroviolacea)	97,727	1
2044	C	T	T	C	C	R	G	G	A	Y	C	Y	G	A	T			KY483907.1 (Mandevilla atroviolacea)	97,727	1
2017	C	T	T	C	C	R	K	G	A	Y	C	T	G	A	T			KY483907.1 (Mandevilla atroviolacea)	97,727	1
2054	C	T	T	C	Y	G	G	G	A	C	C	Y	G	A	T			KY483907.1 (Mandevilla atroviolacea)	98,52	1
2005	C	T	T	C	Y	R	K	G	A	Y	C	T	G	A	T			KY483907.1 (Mandevilla atroviolacea)	97,403	1
2011	C	T	T	C	Y	R	K	G	A	Y	C	T	G	A	T			KY483907.1 (Mandevilla atroviolacea)	97,403	1
2035	C	T	T	C	Y	R	K	G	A	Y	C	T	G	A	T			KY483907.1 (Mandevilla atroviolacea)	97,403	1
2015	C	W	T	C	Y	G	K	G	A	C	C	T	R	A	T			KY483907.1 (Mandevilla atroviolacea)	97,403	1
2016	C	W	T	C	Y	G	K	G	A	C	C	Y	R	A	T			KY483907.1 (Mandevilla atroviolacea)	97,78	1
2006	C	W	T	C	Y	R	K	G	A	Y	Y	T	G	A	T			KY483907.1 (Mandevilla atroviolacea)	96,753	1
2002	C	W	T	C	Y	R	K	G	A	Y	Y	T	R	A	T			KY483907.1 (Mandevilla atroviolacea)	96,429	1
2003	C	W	T	C	Y	R	K	G	A	Y	Y	T	R	A	T			KY483907.1 (Mandevilla atroviolacea)	96,429	1
2004	C	W	T	C	Y	R	K	G	A	Y	Y	T	R	A	T			KY483907.1 (Mandevilla atroviolacea)	96,429	1
2008	C	W	T	C	Y	R	K	G	A	Y	Y	T	R	A	T			KY483907.1 (Mandevilla atroviolacea)	96,429	1
2025	C	W	T	C	Y	R	K	G	A	Y	Y	T	R	A	T			KY483907.1 (Mandevilla atroviolacea)	96,429	1
2029	C	W	T	C	Y	R	K	G	A	Y	Y	T	R	A	T			KY483907.1 (Mandevilla atroviolacea)	96,429	1
2037	C	W	T	C	Y	R	K	G	A	Y	Y	T	R	A	T			KY483907.1 (Mandevilla atroviolacea)	96,429	1
2014	C	W	T	C	Y	R	K	G	A	Y	Y	T	R	A	T			KY483907.1 (Mandevilla atroviolacea)	96,429	1
2001	C	W	T	Y	Y	R	K	G	M	Y	Y	T	R	A	T			KY483907.1 (Mandevilla atroviolacea)	95,779	1
2034	Y	T	T	Y	Y	G	K	S	M	C	C	Y	R	R	T			KY483907.1 (Mandevilla atroviolacea)	95,779	1
2038	Y	T	T	Y	Y	G	K	S	M	C	C	Y	R	R	T			KY483907.1 (Mandevilla atroviolacea)	95,779	1
2043	Y	T	T	Y	Y	G	K	S	M	C	C	Y	R	R	T			KY483907.1 (Mandevilla atroviolacea)	95,779	1
2039	Y	T	T	Y	Y	R	K	S	M	Y	C	T	G	R	T			KY483907.1 (Mandevilla atroviolacea)	95,779	1
2027	Y	T	T	Y	Y	R	K	S	M	Y	C	T	R	R	T			KY483907.1 (Mandevilla atroviolacea)	95,455	1
2036	Y	T	T	Y	Y	R	K	S	M	Y	C	T	R	R	T			KY483907.1 (Mandevilla atroviolacea)	95,455	1
2042	Y	T	T	Y	Y	R	K	S	M	Y	C	T	R	R	T			KY483907.1 (Mandevilla atroviolacea)	95,455	1
2045	Y	T	T	Y	Y	R	K	S	M	Y	C	T	R	R	T			KY483907.1 (Mandevilla atroviolacea)	95,455	1
2048	Y	T	T	Y	Y	R	K	S	M	Y	C	T	R	R	T			KY483907.1 (Mandevilla atroviolacea)	95,455	1
2030	Y	W	T	Y	Y	G	K	S	M	C	Y	T	R	R	T			KY483907.1 (Mandevilla atroviolacea)	95,455	1
2041	Y	W	T	Y	Y	G	K	S	M	C	Y	T	R	R	T			KY483907.1 (Mandevilla atroviolacea)	95,455	1
W = A o T
Y = C o T
K = T o G
S = G o C
M = A o C
R = A o G
