# Supplementary material for: First Genomic Insights Into The <em>Mandevilla</em> Genus
Source: Preprints.org preprint supplement (doi:10.20944/preprints202204.0255.v1), 2022-04-27
Supplement: Supplementary file 1 [file supplementary › Table S8.xlsx]

## Sheet: Table S8
Table S8. Plastomes used for phylogenetic analysis within the Apocynaceae family. Latin name, taxonomic family, BioProject, size (in Mb) of each plastome, GC % content and GenBank IDs are indicated for each species included in the analysis
Organism Name	Family	BioProject	Size(Mb)	GC%	GenBank ID
Periploca forrestii	Apocynaceae	PRJNA737873	0.153826	38.186	NC_056319.1/MW246153.1
Alstonia scholaris	Apocynaceae	PRJNA755117	0.154699	37.9311	NC_057091.1/MN176280.1
Asclepias nivea	Apocynaceae	PRJNA221312	0.161592	37.9202	KF539844.1
Asclepias syriaca	Apocynaceae	PRJNA221190	0.158719	37.8291	NC_022432.1/KF386166.1
Calotropis procera	Apocynaceae	PRJNA532054	0.16601	37.4899	NC_041440.1/MH939982.1
Carissa macrocarpa	Apocynaceae	PRJNA362449	0.155297	38.0381	NC_033354.1/KX364402.1
Cerbera manghas	Apocynaceae	PRJNA680095	0.154428	38.0035	NC_051546.1/MT527963.1
Chonemorpha megacalyx	Apocynaceae	PRJNA737897	0.155694	38.3329	NC_056322.1/MW246159.1
Gymnema sylvestre	Apocynaceae	PRJNA628326	0.16117	37.9978	NC_047175.1/MN711723.1
Hemidesmus indicus	Apocynaceae	PRJNA628274	0.155913	37.4427	NC_047471.1/MN736959.1
Hoya carnosa	Apocynaceae	PRJNA608396	0.17634	37.1266	NC_045868.1/MN781974.1
Hoya liangii	Apocynaceae	PRJNA541696	0.162989	37.6578	NC_042245.1/MH678666.1
Hoya pottsii	Apocynaceae	PRJNA541599	0.161565	37.6282	NC_042246.1/MH678667.1
Oncinotis tenuiloba	Apocynaceae	PRJNA267307	0.155011	37.956	NC_025657.1/KJ953908.1
Pentasachme caudatum	Apocynaceae	PRJNA717512	0.158487	37.8429	NC_054347.1/MW136321.1
Pergularia tomentosa	Apocynaceae	PRJNA661872	0.164213	37.723	NC_050396.1/MN548766.1
Rhazya stricta	Apocynaceae	PRJNA252472	0.154841	37.6231	NC_024292.1/KJ485849.1
Wrightia laevis	Apocynaceae	PRJNA717599	0.155274	38.0514	NC_054286.1/MT505711.1
Apocynum venetum	Apocynaceae	PRJNA707778	0.156596	38.1472	NC_053902.1/MT365042.1
Calotropis gigantea	Apocynaceae	PRJNA532149	0.165928	37.4898	NC_041431.1/MH939981.1
Echites umbellatus	Apocynaceae	PRJNA267428	0.15397	38.0191	NC_025655.1/KJ953904.1
Pentalinon luteum	Apocynaceae	PRJNA267433	0.154053	38.3056	NC_025658.1/KJ953909.1
Plumeria rubra	Apocynaceae	PRJNA609464	0.153912	37.9386	NC_046018.1/MN812495.1
Rauvolfia serpentina	Apocynaceae	PRJNA628328	0.155102	37.9679	NC_047244.1/MN746301.1
Rauvolfia verticillata	Apocynaceae	PRJNA624534	0.155856	37.9273	NC_046841.1/MN480804.1
Vincetoxicum hainanense	Apocynaceae	PRJNA684242	0.16128	37.6749	NC_051946.1/MN395661.1
Vincetoxicum insigne	Apocynaceae	PRJNA550717	0.160381	37.8299	NC_042760.1/MH748558.1
Vincetoxicum shaanxiense	Apocynaceae	PRJNA624402	0.160308	37.8315	NC_046785.1/MH210646.1
Vincetoxicum versicolor	Apocynaceae	PRJNA700368	0.159907	37.7757	NC_052877.1/MT558564.1
Catharanthus roseus	Apocynaceae	PRJNA207570	0.15495	38.091	NC_021423.1/KC561139.1
Cynanchum auriculatum	Apocynaceae	PRJNA313650	0.16084	37.7555	NC_029460.1/KT220734.1
Cynanchum wilfordii	Apocynaceae	PRJNA313707	0.161241	37.7677	NC_029459.1/KT220733.1
Nerium oleander	Apocynaceae	PRJNA267360	0.154903	38.0574	NC_025656.1/KJ953907.1
Gentiana officinalis	Gentianaceae	PRJNA496192	0.148879	37.77	NC_039574.1/MH261261.1
