# Supplementary material for: First Genomic Insights Into The <em>Mandevilla</em> Genus
Source: Preprints.org preprint supplement (doi:10.20944/preprints202204.0255.v1), 2022-04-27
Supplement: Supplementary file 1 [file Table S1.xlsx]

## Sheet: Table S1
Table S1. Genes of Mandevilla chloroplast genome. 1 indicates introns-containing genes
Gene group	Gene name
Photosynthesis gene
Rubisco	rbcL
Photosystem I	psaA, psaB, psaC, psaI, psaJ
Assembly/Stability of Photosystem I	ycf31, ycf4
Photosystem II	psbA, psbC, psbD, psbE, psbF, psbI, psbJ, psbK, psbL, psbM, psbZ
ATP synthase	atpA, atpB, atpE, atpF1, atpH, atpI
Cytochrome complex	petA, petB, petD1, petG, petL, petN
Cytochrome synthesis	ccsA
NADP dehydrogenase	ndhA1, ndhB1, ndhC, ndhD, ndhE, ndhF, ndhG, ndhH, ndhI
Transcription and translation gene
Transcription	rpoA, rpoB, rpoC11, rpoC2
Ribosomal proteins
small subunit	rps2, rps3, rps4, rps7, rps8, rps11, rps121, rps14, rps15, rps161, rps18, rps19
large subunit	rpl21, rpl14, rpl161, rpl20, rpl22, rpl23, rpl32, rpl33, rpl36
Translation initiationfactor	infA
RNA genes
Ribosomal RNA	rrn5, rrn4.5, rrn16, rrn23
tRNA	trnA-UGC1, trnC-GCA, trnD-GUC, trnE-UUC, trnF-GAA, trnfM-CAU, trnG-GCC, trnG-UCC, trnH-GUG, trnI-CAU, trnI-GAU1, trnK-UUU1, trnL-CAA, trnL-UAA1, trnL-UAG, trnM-CAU, trnN-GUU, trnP-UGG, trnQ-UUG, trnR-ACG, trnR-UCU, trnS-GCU, trnS-GGA, trnS-UGA, trnT-GGU, trnT-UGU, trnV-GAC, trnV-UAC1, trnW-CCA, trnY-GUA
Other genes
RNA processing	matK
Carbon metabolism	cemA
Fatty acid biosynthesis	accD
Proteolysis	clpP11
Genes of unknown function
Conserved reading frames	ycf1, ycf2
